# Supplementary material for: Integration of transcriptomics and long-read genomics prioritizes structural variants in rare disease
Source: HighWire-hosted journal article supplement (doi:10.1101/gr.279323.124), 2025-03-20
Supplement: Supplemental_Table_S2.xlsx [file Supplemental_Table_S2.xlsx]

## Sheet: Supplementary_Table_2
ID	RS	Technology	bin	median_RL	mean_RL	var_RL
chr10:100011685:AAAT	4	Long Reads (vamos)	4-6bp	7	7.48039	0.648127
chr10:100021719:TTTTTTTTTTTTTTGAGATGAAGTTTCGCTTTTGTCACCCAGGCTGGAGTGCAGTGGTGCAATCTCAGCTCACTGCAACCTCTACCTCCCGGGTTCAAGCGATTCTCCTGCCTCAGCCTCCTGAGTAGCTGGGATTACAGGTGCCTGCCACCACACCCAGC	161	Long Reads (vamos)	16bp+	2	2	0
chr10:100025364:AAGAAGA	7	Long Reads (vamos)	7-15bp	8	8	0.308943
chr10:100029613:AAAAAAATTAGCCAGGCATGGTGGTGCACACCTGTAATCCCAGCTACTCAGGAGTCTGAGGCAGGAGAATCATTGAACCCGGGAGGCAGAGCTTGCAGTAAGCCGAGATAACACTACTGCACTCCAGCCTGGGTGACAAAAAGTGAGATTCTGTCTCAAAAAAAAAAAAAAA	172	Long Reads (vamos)	16bp+	2	2	0
chr10:100032094:AAAG	4	Long Reads (vamos)	4-6bp	11	10.7704	1.11852
chr10:100035236:AAT	3	Long Reads (vamos)	2-3bp	17	16.4032	4.68162
chr10:100036277:TTGTTTTTTTTT	12	Long Reads (vamos)	7-15bp	2	1.95495	0.207043
chr10:100037714:TCTTTTCTGTTCTTTCTTTTCTTTTCC	27	Long Reads (vamos)	16bp+	3	3.14545	0.143786
chr10:100040971:CTAAATCTAAACATATCTAA	20	Long Reads (vamos)	16bp+	2	2	0
chr10:100042830:TGGCTGTAATCCCAGCACTTTGGGAGGCTGAGGTGGTGGATCACCTGAGGTCAGGAGTTCAAGACCACACCGGGCAATATGGTGAAACCCTGTCTCTACTAAAAATACAAAGAAATTAGCCAGGTGTGGTGGTGCACACCTATAGTCCCAGCTACTCAGGAGGCTGAGGCGGTAGAATTGCTTGAACCCAGGAGGTGGAGGCTGCAGTGAGCTGAGATCTTGCCACTGCACTCCAGCCTGGGTGACAGCGAGACTCCATCTCAAAAAAAAAAAAAAAAAAGAAAAAAATTAGGTTGGGCATGG	303	Long Reads (vamos)	16bp+	2	1.9901	0.00990099
chr10:10004877:CTGCATGAGCTT	12	Long Reads (vamos)	7-15bp	2	2	0
chr10:100050359:AACA	4	Long Reads (vamos)	4-6bp	6	5.81818	0.572143
chr10:100052703:AAAAAATAAAAA	12	Long Reads (vamos)	7-15bp	2	1.98148	0.0183454
chr10:10005506:ATATATATAAAATGT	15	Long Reads (vamos)	7-15bp	2	2.07317	0.068654
chr10:10005590:ATATTACATATATAACATGTT	21	Long Reads (vamos)	16bp+	3	3.48819	0.267717
chr10:100058735:AGAAAAACAAAGCT	14	Long Reads (vamos)	7-15bp	2	2	0
chr10:100063883:GTGTGTATGTGT	12	Long Reads (vamos)	7-15bp	2	1.98649	0.068308
chr10:100064349:TATATAGATATATTA	15	Long Reads (vamos)	7-15bp	3	2.79832	0.196268
chr10:100072164:TTTTTGTTGTTTG	13	Long Reads (vamos)	7-15bp	2	2.04464	0.0430341
chr10:100078029:CTTTTTCTTTTTT	13	Long Reads (vamos)	7-15bp	2	1.90667	0.0857658
chr10:100081090:GGGGAAAAGAAAGGAAATG	19	Long Reads (vamos)	16bp+	2	2	0
chr10:100085493:TCACAGAGAGGTGGCCCAGATAG	23	Long Reads (vamos)	16bp+	2	2	0
chr10:100087949:AGAGCAAGCAAGAGAGAGAGAGAGACAG	28	Long Reads (vamos)	16bp+	2	2.14286	0.162088
chr10:100090272:AAATGACTTAATTTATGTA	19	Long Reads (vamos)	16bp+	2	1.98795	0.0120482
chr10:100092110:CCTCTC	6	Long Reads (vamos)	4-6bp	18	17.5852	2.49829
chr10:100092582:GCCCGGCCAGCTGCCCCGTCCGCGAGGGAGGTGGGGGGGTCAGCCCCCCGCCCGGCCAGCCGCCCCGTCCGGGAGGGAGGTGGGGGGGGTCAGCCCCCCTGCCCGGCCAGCCGCCCCGTCCGGGAGGTGAGGGGCGCCTCTGCCCGGCCGCCCCTACTGGGAAGTGAGGAGCCCCTCT	178	Long Reads (vamos)	16bp+	8	7.85047	0.845354
chr10:100095034:TTCA	4	Long Reads (vamos)	4-6bp	7	7.08861	0.133074
chr10:100095553:TTTTTCTTTTT	11	Long Reads (vamos)	7-15bp	2	2.22807	0.21301
chr10:100110581:AGATCCTGCCACTGCAATCCAGCCTGGGCAACA	33	Long Reads (vamos)	16bp+	2	2	0
chr10:100110704:TCCCTTTCCTATACAGTATACTTGACA	27	Long Reads (vamos)	16bp+	2	2	0
chr10:100113659:TTTTTGTTTTGTTTTG	16	Long Reads (vamos)	16bp+	2	1.97959	0.0201978
chr10:100115099:CTCGCGCCCCCCG	13	Long Reads (vamos)	7-15bp	3	2.88983	0.115964
chr10:100115553:TTAT	4	Long Reads (vamos)	4-6bp	14	13.0376	2.44555
chr10:100116096:AAATTGTATTTGTACAATTTTGCAT	25	Long Reads (vamos)	16bp+	3	2.73034	0.199183
chr10:100122107:AGGA	4	Long Reads (vamos)	4-6bp	17	16.1008	9.66771
chr10:100122909:AAAAC	5	Long Reads (vamos)	4-6bp	7	6.62121	0.52718
chr10:100126845:TTAT	4	Long Reads (vamos)	4-6bp	10	9.04505	2.57068
chr10:100127172:ATA	3	Long Reads (vamos)	2-3bp	16	15.2598	4.8129
chr10:100132602:TAAA	4	Long Reads (vamos)	4-6bp	11	10.024	2.53974
chr10:100134226:AAAC	4	Long Reads (vamos)	4-6bp	6	6.45	0.532828
chr10:100138730:ACACACACACACACACACACACTATATATACATATATATAT	41	Long Reads (vamos)	16bp+	5	4.81651	0.280836
chr10:100144314:TTTTTAT	7	Long Reads (vamos)	7-15bp	5	5.15833	0.218417
chr10:100148652:TGACTCCTGTAGACAA	16	Long Reads (vamos)	16bp+	2	2	0
chr10:100158534:AAAAAAAAAATCACCAG	17	Long Reads (vamos)	16bp+	2	1.97297	0.0266568
chr10:100192995:AGCTAATAATAAGCAACATTTG	22	Long Reads (vamos)	16bp+	2	2	0
chr10:100197601:CCTATATTTACGTTTTCTCTCTCT	24	Long Reads (vamos)	16bp+	2	2.0082	0.00819672
chr10:100203401:TCAATAATATACAAATAGAAATAAAATA	28	Long Reads (vamos)	16bp+	2	2	0
chr10:100205927:CAAAAA	6	Long Reads (vamos)	4-6bp	5	4.98261	0.104958
chr10:100206754:CAATTTTGTGCTTTACTTTA	20	Long Reads (vamos)	16bp+	2	1.97222	0.0273865
chr10:100210009:TTTCAAAATTAAGAAA	16	Long Reads (vamos)	16bp+	2	2.01282	0.0128205
chr10:100210064:TTAT	4	Long Reads (vamos)	4-6bp	8	7.78571	1.93565
chr10:100213000:AAAAAGAAAAAAAAAGAAAAAAG	23	Long Reads (vamos)	16bp+	5	5.36842	2.44657
chr10:100214241:GTACATACTATTGGTA	16	Long Reads (vamos)	16bp+	3	2.65049	0.229583
chr10:100220346:GAAAAAGAAAAAAAA	15	Long Reads (vamos)	7-15bp	2	1.87912	0.107448
chr10:100229370:CGCTCAAACCCACCGC	16	Long Reads (vamos)	16bp+	2	2	0
chr10:100232373:GGAGCTGGATAACAGACATA	20	Long Reads (vamos)	16bp+	2	2	0
chr10:100255382:GCCTGTAATCCCAGCACTTTGGGAGGCCGAGGCAGGCAGATTGTCTGAGCTCAGGAGTTCATGACTAGCCTGGGCAACATGCTGAAACCCCATCTCTAATAAAATACAAAAAA	113	Long Reads (vamos)	16bp+	2	2	0
chr10:100255932:AAAAAAC	7	Long Reads (vamos)	7-15bp	4	3.84746	0.164566
chr10:100260167:AAAAACA	7	Long Reads (vamos)	7-15bp	5	4.71318	0.596778
chr10:100262436:GACTCCTCCTATCTTAGTAC	20	Long Reads (vamos)	16bp+	2	2	0
chr10:100265506:TTTTCTTTTTTTCT	14	Long Reads (vamos)	7-15bp	2	2.16393	0.204308
chr10:100266823:TTTGT	5	Long Reads (vamos)	4-6bp	9	8.90625	0.400591
chr10:100267910:CTAAC	5	Long Reads (vamos)	4-6bp	7	7.5	1.68095
chr10:100270633:TTTGT	5	Long Reads (vamos)	4-6bp	8	7.95522	0.403995
chr10:100276288:TCTCCC	6	Long Reads (vamos)	4-6bp	39	38.7153	7.39631
chr10:100276905:CCGCCCGGCCAGCCGCCCCGTCCGGGAGGGAGGTGGGGGGCTCAGCCCCCCGCCCGGCCAGCCGCCCCGTCCGGGAGGTGAGGGGCGCCTCTGCCTGGCCGCCCCTACTGGGAAGTGAGGAGCCCCTCTGCCCGGCCAGCCGCCCCGTCCGGGAGGGAGGTGGGGGAGTCAGCCCC	176	Long Reads (vamos)	16bp+	8	8.25688	0.266735
chr10:10027913:AAAAAC	6	Long Reads (vamos)	4-6bp	6	6.24194	0.298715
chr10:100289539:AAATAAAATAAAA	13	Long Reads (vamos)	7-15bp	3	2.98261	0.0347826
chr10:100296034:AAAAAAAAAAAAAG	14	Long Reads (vamos)	7-15bp	3	3.14844	0.332124
chr10:10029878:AATAAAAAAAATAA	14	Long Reads (vamos)	7-15bp	4	4.36567	0.534452
chr10:100298931:ATT	3	Long Reads (vamos)	2-3bp	10	9.18919	1.57297
chr10:100302232:GCATACACACACACACACAC	20	Long Reads (vamos)	16bp+	3	2.816	0.167484
chr10:100303945:TCGGAGAAATAACATTGC	18	Long Reads (vamos)	16bp+	2	1.96471	0.0344538
chr10:100309215:TGTATCCATAAAATGA	16	Long Reads (vamos)	16bp+	2	2	0
chr10:100310337:CAAA	4	Long Reads (vamos)	4-6bp	8	7.95495	0.316134
chr10:100310910:TTTCACGTTGCCCAGG	16	Long Reads (vamos)	16bp+	2	2	0
chr10:100314965:GGAAG	5	Long Reads (vamos)	4-6bp	35	39.7481	420.775
chr10:100315234:CAGGTTTGTCACATAGGTATACATGTGCCATGGTGGTTTGCTGCACCTATCGACTCATCATCTAGGTTTTAAG	73	Long Reads (vamos)	16bp+	2	2	0
chr10:100318523:TTTTTTTTTTTTTTAGATGGAATCTCACTCTGTCGCCCAGGCTGAGTACAGTGGCGTGATCTCGGCTCACTGCAACCTCCACCTCTGGGGTTCAAGTGATTCTCCTGCCTCAGCTTCCCGAGTAGCTGGGATTACAGGCACACACCGCTGTGCCCATCTGATTCTTGTATTTTTAGTAGAGATGGGGTTTCACCATGTTGCCCAGGCTGGTCTTGAATTCCCCACCTCAGGTGATCCACCTGCCTCAGCCTCCCAAAGTTTTGGGATTACAGGCGTGAGCCAC	283	Long Reads (vamos)	16bp+	2	2	0
chr10:10033373:TGTGTGTGTGTGTATATATGTATA	24	Long Reads (vamos)	16bp+	6	6.32576	1.48849
chr10:100333987:GTGCAGATGCATGTGTGTGGGATGGGGTCCTGACAGCCAT	40	Long Reads (vamos)	16bp+	2	1.98851	0.0114943
chr10:100348783:GGAGAGAGCTCATTGGAAAGAGA	23	Long Reads (vamos)	16bp+	2	2	0
chr10:100357624:TCTTT	5	Long Reads (vamos)	4-6bp	10	10.1591	0.638619
chr10:10036860:CATATACACACA	12	Long Reads (vamos)	7-15bp	3	2.88421	0.146025
chr10:10037235:TTTTTAAATAT	11	Long Reads (vamos)	7-15bp	5	4.96396	0.0350532
chr10:100375969:TATATGTGTA	10	Long Reads (vamos)	7-15bp	27	26.9265	2.51307
chr10:100378673:TGTTT	5	Long Reads (vamos)	4-6bp	5	5.01235	0.162346
chr10:100380220:AAAAAAAAAAA	11	Long Reads (vamos)	7-15bp	3	3.03937	0.307962
chr10:100381085:ATATTCTCCCTGCCCTTGAGAATGTACTTTGT	32	Long Reads (vamos)	16bp+	2	2	0
chr10:100384729:ATCCCACAGCACACTTTAAAAGG	23	Long Reads (vamos)	16bp+	2	1.97183	0.0277666
chr10:100390287:AATAAA	6	Long Reads (vamos)	4-6bp	4	4.12048	0.156039
chr10:100390736:ATATATAATATATATATAT	19	Long Reads (vamos)	16bp+	3	2.58491	0.492722
chr10:100399212:CAAA	4	Long Reads (vamos)	4-6bp	7	6.96429	0.180519
chr10:100399396:TTTA	4	Long Reads (vamos)	4-6bp	8	7.96341	0.331978
chr10:100406457:GGACAGTGGGTGCA	14	Long Reads (vamos)	7-15bp	2	1.96739	0.031892
chr10:100411084:ACCAAAACAGCATGGTACTGGT	22	Long Reads (vamos)	16bp+	2	2.05479	0.0525114
chr10:100418342:GAAA	4	Long Reads (vamos)	4-6bp	46	45.9416	22.5113
chr10:100419465:AAGA	4	Long Reads (vamos)	4-6bp	39	38.3037	14.5713
chr10:100421091:AAAAGAAAAGAAAGAAAG	18	Long Reads (vamos)	16bp+	3	3.26772	0.324584
chr10:100422033:TTTATT	6	Long Reads (vamos)	4-6bp	8	7.92537	0.595893
chr10:100428242:AAATAAAAAATAAAAAT	17	Long Reads (vamos)	16bp+	2	2.16	0.135758
chr10:100431567:TATTT	5	Long Reads (vamos)	4-6bp	9	9.14844	0.253383
chr10:100435082:TTTA	4	Long Reads (vamos)	4-6bp	8	8.632	1.36348
chr10:100442024:TCATGCCTGTAATCCCAGCACTTTGGGAGGCTGAGGTGGGCAGATCATGAGGTCAGGAGATCGAGACCATCCTGGCCAACATGGTGAAACCCCATCTCTACTAAAA	106	Long Reads (vamos)	16bp+	2	2.01205	0.0120482
chr10:100442596:AAAC	4	Long Reads (vamos)	4-6bp	6	6.06579	0.115614
chr10:100448939:GAA	3	Long Reads (vamos)	2-3bp	15	15.5833	3.05407
chr10:100450171:TACCCACTTAGT	12	Long Reads (vamos)	7-15bp	2	1.98571	0.0142857
chr10:100460967:ATAG	4	Long Reads (vamos)	4-6bp	20	20.315	1.39208
chr10:100475163:CGGGAGGCGGAGGCTGCAGTGAGCCGAGATCATGCCACTGCACTCCAATCTGGGCAAGACAGAGCAAGACTCCGTCTCAAAAAACAAACAAACAGAAAAACACAAGTCC	109	Long Reads (vamos)	16bp+	2	2	0
chr10:100476127:AAAAATACAAAAAAAA	16	Long Reads (vamos)	16bp+	2	1.94872	0.0835544
chr10:100491950:TGGAACCATACCTGC	15	Long Reads (vamos)	7-15bp	2	1.98901	0.010989
chr10:100493994:AAGGGAGGGAA	11	Long Reads (vamos)	7-15bp	3	2.97	0.211212
chr10:100501277:CTGTCCTATAGGTACCA	17	Long Reads (vamos)	16bp+	2	2	0
chr10:100501872:TTTTTCCTTTCTCCTC	16	Long Reads (vamos)	16bp+	2	2.38938	0.239886
chr10:100511123:AGAGGGCAGTTACTTC	16	Long Reads (vamos)	16bp+	2	2	0
chr10:100513806:ACAAATATTTATTAAAT	17	Long Reads (vamos)	16bp+	2	2	0
chr10:100525614:GTGTGTGTGTGTGTGTGTGTGTGTGTGTGTGTGTGTGTGTGTTAGCATCTAGGTAGCCCTTCTCCTTGACAGTAACTCATACCACTAAGCACATACGT	98	Long Reads (vamos)	16bp+	2	1.98936	0.0106383
chr10:100531367:CAAAAA	6	Long Reads (vamos)	4-6bp	6	6.01587	0.239746
chr10:100549043:GTGTGTGTGTGTGTGTCCGTGT	22	Long Reads (vamos)	16bp+	3	2.79508	0.21386
chr10:100571256:GTGTGGCTGT	10	Long Reads (vamos)	7-15bp	4	4.01923	0.154966
chr10:100572146:GGTGCAGTGGCTCACGCCTGTAGTCCCAGCACTTTGGGAGGCCGAGGTGGGTGGATCACAAGGTCAAGAGTTTGAGACCAGCCTGGCCGACATGGTGAAACCCCGTCTCTACTAAAAATACAACAATTAGCTGGGCATGGTGGCATGTGCTTGTAGTTCCAGCTACTCGGGAGGCTGAGGCAGGAGGATCACTTGAACCTGGGAGGCAGAGGTTGCAGTGAGCAGAGATCGTGCCACTGCACTCCAGCCTGGGTGACA	258	Long Reads (vamos)	16bp+	2	2	0
chr10:100593101:AAAC	4	Long Reads (vamos)	4-6bp	13	12.5484	0.753737
chr10:100593432:AAATTTTTAAAAATA	15	Long Reads (vamos)	7-15bp	3	2.99138	0.00862069
chr10:100596597:CTCTCTTTCTCCCTCCCTCCCTTCC	25	Long Reads (vamos)	16bp+	4	4.09009	0.137265
chr10:100601854:GGAGGCCTCTTTATTGAA	18	Long Reads (vamos)	16bp+	2	1.96809	0.0312286
chr10:100603421:CTGTAATCCCAGCACATTGGGAGGCTGAGGCAGGTGGATCACTTGAGGCCAGGAGTTCGAGACCAGCCTGGCCAACATGGTGAAACCCTGTCTCTACTAAAAATACAAAAAAAAGTTAGCAGGGCATGGTGGCGTGTGCCTGTACTCCCAGCTACTTAGGAGGCTGAAGTATGAGAATTACTTGAACTCAGAAGGCAGAGGTTGCAGTGAGTTGAGATCACTCCACTGTACTCCAGCCTGGGCAATAGAGCAAGACTCTGTCTCAAAAACGAATAGAGGCCGGGTGCGGTGGCTCACGC	299	Long Reads (vamos)	16bp+	2	2	0
chr10:100605470:AAGG	4	Long Reads (vamos)	4-6bp	29	28.6538	1.54592
chr10:100616808:TGTCTCTTGCCCTTCCATAGCCTAA	25	Long Reads (vamos)	16bp+	1	1.03704	0.0361111
chr10:100622020:TGTGTGTGTGTGTGCGTG	18	Long Reads (vamos)	16bp+	2	2.45045	0.267977
chr10:100627426:AAAT	4	Long Reads (vamos)	4-6bp	7	7.18681	1.24249
chr10:100629130:TTCTCCCTGGGCCCCACTC	19	Long Reads (vamos)	16bp+	2	2.03704	0.0361111
chr10:100629710:GAGAGAGCGGGAGA	14	Long Reads (vamos)	7-15bp	5	4.93496	0.356391
chr10:100630158:AATA	4	Long Reads (vamos)	4-6bp	8	7.89899	0.234591
chr10:100636025:GGATGGACAAATGGA	15	Long Reads (vamos)	7-15bp	3	3	0
chr10:100636572:AGCTGTGCCATTTGCC	16	Long Reads (vamos)	16bp+	2	2	0
chr10:100643986:ACCCTGTCTCAAA	13	Long Reads (vamos)	7-15bp	2	2.26437	0.452553
chr10:100649356:TTGTTGAGTTGTATTGACATGT	22	Long Reads (vamos)	16bp+	2	2	0
chr10:100650881:ACCTTCCCCACTCCCACC	18	Long Reads (vamos)	16bp+	61	60.7737	298.029
chr10:100655284:CTCCCCCCTCCCCCTCT	17	Long Reads (vamos)	16bp+	2	1.90909	0.0834028
chr10:100657377:AAAC	4	Long Reads (vamos)	4-6bp	7	7.6746	1.40527
chr10:1006642:AAAAAGATGGCACTCCTGATGCCATGGTCGCACTCAGGA	39	Long Reads (vamos)	16bp+	2	2	0
chr10:100670467:CTGTCCCTGTCTCTCCCTCCGTCTTTGTCTCTGCCTCTGTCC	42	Long Reads (vamos)	16bp+	6	5.8871	0.393653
chr10:100672313:TTTC	4	Long Reads (vamos)	4-6bp	59	59.0677	15.0333
chr10:100673367:CTGTGGCAGGCA	12	Long Reads (vamos)	7-15bp	2	1.98571	0.0142857
chr10:100676324:ACACATATATATACACAC	18	Long Reads (vamos)	16bp+	5	4.93023	0.065407
chr10:100685536:CATGCCTGCCA	11	Long Reads (vamos)	7-15bp	4	3.99074	0.00925926
chr10:100693510:GTTT	4	Long Reads (vamos)	4-6bp	8	7.91667	0.182456
chr10:100696490:AGAGAA	6	Long Reads (vamos)	4-6bp	21	20.1955	4.84028
chr10:100705579:CATCCTGGCTAACACAGTGAAAC	23	Long Reads (vamos)	16bp+	2	2	0
chr10:100731826:CTGTCTCT	8	Long Reads (vamos)	7-15bp	6	6	0.216667
chr10:100765916:ATC	3	Long Reads (vamos)	2-3bp	10	10.3529	0.654038
chr10:100769626:AATAA	5	Long Reads (vamos)	4-6bp	14	13.845	2.16328
chr10:100788874:CCGACACACACACATGCACA	20	Long Reads (vamos)	16bp+	2	1.97753	0.0222165
chr10:100790911:AGCCTCAGAGCCAAGTTGC	19	Long Reads (vamos)	16bp+	2	2.01176	0.0117647
chr10:100791342:TGTGTGTACATGTGTA	16	Long Reads (vamos)	16bp+	3	2.92453	0.0894879
chr10:100800233:TTTCT	5	Long Reads (vamos)	4-6bp	13	13.0221	2.91062
chr10:100804941:TCTCTCTCTCTCTCTCCTTCTC	22	Long Reads (vamos)	16bp+	6	6.35878	0.570288
chr10:100807261:TGTGCTCACACACCACCGCCCACCTGCTCCCTCACCCACAGCCCACGGTAC	51	Long Reads (vamos)	16bp+	6	5.96	0.0387879
chr10:100819570:AATAAA	6	Long Reads (vamos)	4-6bp	4	4.06667	0.144144
chr10:100827839:CCCGCCTGCCGCCCCTC	17	Long Reads (vamos)	16bp+	3	2.61261	0.257658
chr10:100829210:CTCCCTCTGCCCCTCT	16	Long Reads (vamos)	16bp+	2	2.22857	0.178022
chr10:100829892:ATAAGAAATAAATAATA	17	Long Reads (vamos)	16bp+	2	1.98718	0.0128205
chr10:100839799:AAGG	4	Long Reads (vamos)	4-6bp	26	27.4062	19.8022
chr10:100841683:TAAA	4	Long Reads (vamos)	4-6bp	11	11.4019	0.997355
chr10:100845543:TTTATTTATT	10	Long Reads (vamos)	7-15bp	3	2.98958	0.0104167
chr10:100846827:GGCCAAGGTGAGTGGATCACTTGAGGTCAGGAGTTTGAGACCAGCCTGGCCAACATGGCAAAACCCCATCTCTACTAAAAATACAAAAATTAGCCAGGTTTGAT	104	Long Reads (vamos)	16bp+	2	2	0
chr10:100847166:AAAAC	5	Long Reads (vamos)	4-6bp	8	7.65873	0.722603
chr10:100850240:TTTCTTTC	8	Long Reads (vamos)	7-15bp	12	12.4812	7.31214
chr10:100856296:ATTACAATAATCTATCTTCAACCTCTCCCTCTCCA	35	Long Reads (vamos)	16bp+	2	1.97297	0.0266568
chr10:100857922:TTG	3	Long Reads (vamos)	2-3bp	9	8.81053	1.21904
chr10:10086209:TATATATATATATATATA	18	Long Reads (vamos)	16bp+	6	6.54455	0.550495
chr10:1008739:TGAACCCACTCCTCTCCCCTAAAATAATCTGTTGGTTGTTAATTGGTCTCGGTA	54	Long Reads (vamos)	16bp+	2	2	0
chr10:100875329:CGCAGGTGCACAGGGGAAGGTCCACACATGGGAA	34	Long Reads (vamos)	16bp+	2	2	0
chr10:100895858:CTCTCTCC	8	Long Reads (vamos)	7-15bp	5	4.58209	0.440579
chr10:100897674:AAATATAATATAA	13	Long Reads (vamos)	7-15bp	3	3.1375	0.120095
chr10:100903416:TTGATTATGTTTTTGTT	17	Long Reads (vamos)	16bp+	2	1.97368	0.0259649
chr10:10090379:TAATATGTAGGATTACA	17	Long Reads (vamos)	16bp+	2	1.98701	0.012987
chr10:100906410:TTTTTTGTTTTG	12	Long Reads (vamos)	7-15bp	2	2.11607	0.121541
chr10:100907453:TCTAACTCAGACTT	14	Long Reads (vamos)	7-15bp	2	2.08889	0.0818976
chr10:10091048:CACTGGCAGGTG	12	Long Reads (vamos)	7-15bp	3	3	0
chr10:100920511:TAATAAATATACATTTATACT	21	Long Reads (vamos)	16bp+	2	2.01408	0.0140845
chr10:1009270:AGAAACAGCCTCTTCCTACCAGAACCTAAAGGCCGGCCCCACAGACAGGGAGATA	55	Long Reads (vamos)	16bp+	2	2	0
chr10:100934587:TTTTA	5	Long Reads (vamos)	4-6bp	9	9.20161	0.341136
chr10:100935845:TTTTTTTTTTTT	12	Long Reads (vamos)	7-15bp	2	2.31579	0.359571
chr10:100936317:TTTTG	5	Long Reads (vamos)	4-6bp	6	6.28889	0.297628
chr10:100949336:GAATAATTA	9	Long Reads (vamos)	7-15bp	3	3	0.0240964
chr10:100951982:CCTGTAATCCCAGCACTTTGGGAGGCCAAGGCGGGCGGATCACTTGAGGTCAGAAGTTCGAGACCAGCCTGGCCAACATGATGAAACCCTGTCTCTACTAAAAATACAAAAAAAAAATTAGCTGGGCATGGTGGCAGACACCTGTAATCCCAGCTACTCTGGAGGCTGAAGCAGGAGAACTGCCTGAACCCAGGAGGTGGAGGTTGCAGTGAGCTGAGATCACACCACTATACTCCAGCCTGGGCAACAGAGGGAGACTCCACCTCAAAAAAAAAAA	277	Long Reads (vamos)	16bp+	2	2	0
chr10:100962829:TGTGTATGTG	10	Long Reads (vamos)	7-15bp	4	3.80952	0.348824
chr10:100970535:CCCCCTCACCACCCCCACACACAAACACA	29	Long Reads (vamos)	16bp+	2	1.96939	0.0299811
chr10:100992020:AATATATATATAT	13	Long Reads (vamos)	7-15bp	2	1.97183	0.0277666
chr10:100999842:GGGCCG	6	Long Reads (vamos)	4-6bp	8	7.74016	0.4002
chr10:101003657:CCTCCTCCTCCT	12	Long Reads (vamos)	7-15bp	3	2.66981	0.22327
chr10:1010037:TTGTTTCCTGTTGTTTTGGGATGGTGGGGTGATTTCTGTAGCTTTCTCCACGTGTGGGTGTTGAATGAGGCTGATGTG	78	Long Reads (vamos)	16bp+	2	2.41739	1.64882
chr10:101006199:CCCAGTC	7	Long Reads (vamos)	7-15bp	4	3.95062	0.0725309
chr10:101010536:GCTGCG	6	Long Reads (vamos)	4-6bp	6	6.42623	0.742447
chr10:101017795:AAAG	4	Long Reads (vamos)	4-6bp	31	31.7956	25.9285
chr10:101019542:TCC	3	Long Reads (vamos)	2-3bp	32	31.7279	12.0662
chr10:101024770:AAAAAGAAAGAAA	13	Long Reads (vamos)	7-15bp	3	3.41732	0.499063
chr10:101025522:TTTA	4	Long Reads (vamos)	4-6bp	11	10.4667	0.808974
chr10:101027233:CCTCCACCCTCC	12	Long Reads (vamos)	7-15bp	3	3.03371	0.0556691
chr10:101034395:TGGGGCAAAG	10	Long Reads (vamos)	7-15bp	3	2.96667	0.0325843
chr10:10103970:TCTTCAAATAATGACTGG	18	Long Reads (vamos)	16bp+	2	2	0
chr10:101046461:AAAGAAAAG	9	Long Reads (vamos)	7-15bp	9	8.91971	0.442035
chr10:10105148:AGAACACAAATGTACTT	17	Long Reads (vamos)	16bp+	2	2.17778	0.147815
chr10:101056490:AAGG	4	Long Reads (vamos)	4-6bp	33	32.8394	6.70932
chr10:101057032:AAAC	4	Long Reads (vamos)	4-6bp	11	10.7926	0.553676
chr10:101067124:GGGAGGGGGA	10	Long Reads (vamos)	7-15bp	4	3.82353	0.679739
chr10:101074672:GTTTTTTTG	9	Long Reads (vamos)	7-15bp	3	2.93814	0.0794674
chr10:1010748:CCCACCCCGGACACTCTGGTGGAGATGCTGGGCCCCTTCGTTATCCTGCACCCCTCCATCCTGACTCTGCCTCCTGCACCTCTTC	85	Long Reads (vamos)	16bp+	6	6.68657	6.30704
chr10:101074980:TTTAA	5	Long Reads (vamos)	4-6bp	9	8.96063	0.530184
chr10:101083811:TTTTTTTATTTTATTTTA	18	Long Reads (vamos)	16bp+	2	2	0
chr10:101092244:TTTC	4	Long Reads (vamos)	4-6bp	13	13.1533	2.70427
chr10:101100978:AAAAAAGA	8	Long Reads (vamos)	7-15bp	5	5.21324	0.776416
chr10:101101282:TTCAAGTATTGAAGTGTA	18	Long Reads (vamos)	16bp+	2	1.98701	0.012987
chr10:10110511:TTTGTTTG	8	Long Reads (vamos)	7-15bp	5	4.5678	0.367159
chr10:101106370:AAAAT	5	Long Reads (vamos)	4-6bp	12	11.9339	1.74559
chr10:101110387:AAAATAAA	8	Long Reads (vamos)	7-15bp	4	3.94355	0.118739
chr10:101110668:TAA	3	Long Reads (vamos)	2-3bp	12	12	7.25862
chr10:101113889:AGAAGGAAAGAAGGAAGGGGAGGGAG	26	Long Reads (vamos)	16bp+	10	9.61832	0.468585
chr10:101115489:TTA	3	Long Reads (vamos)	2-3bp	16	15.881	0.969714
chr10:101117350:TTTTGTT	7	Long Reads (vamos)	7-15bp	5	5.16529	0.189118
chr10:101127879:TTTAT	5	Long Reads (vamos)	4-6bp	7	7.33871	1.2502
chr10:101132869:CCGCTCCCGCCTTCCTCTGCTG	22	Long Reads (vamos)	16bp+	2	1.98649	0.0135135
chr10:101135156:GCTGCACCCTCTGGCAC	17	Long Reads (vamos)	16bp+	2	2.20408	0.432148
chr10:101138423:TGTAATTATGTGTGAG	16	Long Reads (vamos)	16bp+	2	1.98765	0.0123457
chr10:1011385:TTGCTGTCCTGCCTTCTTCTCTCAGCTGAGCTCTCTGGAACATTCTTTTTATACAATAC	59	Long Reads (vamos)	16bp+	4	3.64815	0.230183
chr10:101143894:AGAA	4	Long Reads (vamos)	4-6bp	26	25.8456	3.73154
chr10:10114926:ATTTGTTTGATTTCCTTGTAG	21	Long Reads (vamos)	16bp+	2	2	0
chr10:101152055:CTGGGCTCAGACTC	14	Long Reads (vamos)	7-15bp	2	1.98667	0.0133333
chr10:101153438:ACTTGGGAGGCTGAGGCAGGAGAATC	26	Long Reads (vamos)	16bp+	2	2.01429	0.0142857
chr10:101163479:AGGG	4	Long Reads (vamos)	4-6bp	34	34.4148	8.88635
chr10:101165137:TATATATATG	10	Long Reads (vamos)	7-15bp	4	4.18966	0.189805
chr10:101165208:GTTGTACAATTTAGTGGCATTAAGTATATTCACAAT	36	Long Reads (vamos)	16bp+	2	1.6055	0.241081
chr10:1011670:ATAGCAGATTCTGGG	15	Long Reads (vamos)	7-15bp	2	2	0
chr10:101171424:AAAAC	5	Long Reads (vamos)	4-6bp	8	7.96923	0.789744
chr10:101177791:TTTGT	5	Long Reads (vamos)	4-6bp	7	7.36207	0.337331
chr10:101179907:TTTTG	5	Long Reads (vamos)	4-6bp	6	5.72477	0.442066
chr10:101183946:TACAAAGTACATTCTCAAGGGCGGGGAGAATATTACAAAGTACCTTCTTAAGGGTGGGGAGGGTGTATCC	70	Long Reads (vamos)	16bp+	2	1.98592	0.0140845
chr10:101198135:GGCCACAGAGATGTC	15	Long Reads (vamos)	7-15bp	2	2	0
chr10:101204115:AAAAAAAAAAATTAAATAAAAAGGT	25	Long Reads (vamos)	16bp+	2	2	0
chr10:101206371:GCAGTGGCTCACGCCTGTAATCCCAGCACTTTGGGAGGCCAAGGCAGGTGGATCACGAGGTCAGGAGATCGAGACCATCCTGACTAACACGGTGAAACCCCGTCTCTACTAAAAATACAAAAAATTAGCCAGGCATGGTGGTGGGCACCTGTAGTCCCAGCTACTCGGGAGGCTGAGGCAAGAGAATGGCGTGAACCCAGAAGGCGGAGCTTGCAGTGAGCCGAGATCGCGCCACTGCACCCCAGCCTGGGTGACAGAGCGAGACTCCGTCTCAAGAAAAAAAAAA	286	Long Reads (vamos)	16bp+	2	1.99074	0.00925926
chr10:101212833:ATTT	4	Long Reads (vamos)	4-6bp	6	5.92135	0.255107
chr10:101213884:GTTCTGATCTTTGCCCGCAGT	21	Long Reads (vamos)	16bp+	2	1.97647	0.0232493
chr10:101223601:CGGGTGCTAGTCCAGGCAGAGT	22	Long Reads (vamos)	16bp+	2.5	2.51	0.272626
chr10:101226251:AGGGAGGAGAGGGGA	15	Long Reads (vamos)	7-15bp	2	2	0.0373832
chr10:101228404:GAAGCGCGCAGAGGCACAGGGCGC	24	Long Reads (vamos)	16bp+	2	2	0
chr10:101229367:CTTCTCTCTCCTTCTCTCCC	20	Long Reads (vamos)	16bp+	3	2.67593	0.221097
chr10:101235509:AAAG	4	Long Reads (vamos)	4-6bp	15	15.7246	6.97472
chr10:101244067:TCTCTTTCTTCATTA	15	Long Reads (vamos)	7-15bp	2	1.96341	0.035682
chr10:101245190:ATAGCATGAGTGGGAC	16	Long Reads (vamos)	16bp+	2	1.97183	0.0277666
chr10:101245439:TTTG	4	Long Reads (vamos)	4-6bp	10	9.57025	0.497107
chr10:101247873:TCTT	4	Long Reads (vamos)	4-6bp	8	8.11215	0.855228
chr10:10124822:TATT	4	Long Reads (vamos)	4-6bp	12	12.0965	0.583527
chr10:101251551:TTG	3	Long Reads (vamos)	2-3bp	14	14.2619	1.44286
chr10:101252631:GCTTCTTTTTTTTTTTTTTTTTGAGACAGGGTCTGACTCTGTCGCCCAGGCTTGAGTGTAGTGGCGCAATCTCAGCTCACTGCAGCCTCTGCCTCTCGGGTTCAAGCAATTCTCCAGCCTTACCCTCCCAAGTAGCTGGCCTGCACCACCATGCTAGGCTAATTTTT	167	Long Reads (vamos)	16bp+	2	1.98571	0.0142857
chr10:101257474:TTTTTGTT	8	Long Reads (vamos)	7-15bp	5	4.57692	0.494037
chr10:101258660:TTTA	4	Long Reads (vamos)	4-6bp	11	11.1034	1.53703
chr10:101258898:TGGCTCACACCTGTAATCCCAGCAATTTGGGAGGCCAAGGCGGGTGGATCACCTGAGGTCAGGGGTTGAAGACCAGCCTGGGCAACATGGAGAAACCCTATCTCTACTAAAAATACAAAAATTAGTCAGGTGTGGTGGTGGCTTGAGCCCGTAGTCCCAGCTAGTGGGAGGCTAAAGCAGGAGAATCGCTTGAATCTGGGAGGCGGATGTGTCAGTGAGCCAAAATCACACCGCTGCACTCCAGCCTGGGCAACAGAGTGAGGCTCTCTCAAAAAAAGTAAATAAATAGGCCAGGTGCGG	300	Long Reads (vamos)	16bp+	3	2.98958	0.0104167
chr10:10126482:TCTCACCCAGGCTGGAG	17	Long Reads (vamos)	16bp+	2	1.98571	0.0142857
chr10:101265712:TGTGTGTGTATATATA	16	Long Reads (vamos)	16bp+	3	3.03509	0.104953
chr10:101265907:TTTTATTATTTTTATTT	17	Long Reads (vamos)	16bp+	2	2.02381	0.0235227
chr10:101273025:CTTTTCTTTTTTTTT	15	Long Reads (vamos)	7-15bp	2	2.33594	0.319328
chr10:10127418:ATTAGTTAGTTGTATAAATAA	21	Long Reads (vamos)	16bp+	2	2	0
chr10:101275008:AAT	3	Long Reads (vamos)	2-3bp	11	10.7031	1.32849
chr10:101279816:TTTTTATTATTTA	13	Long Reads (vamos)	7-15bp	2	2	0
chr10:101281054:GGAA	4	Long Reads (vamos)	4-6bp	27	27.0154	2.01527
chr10:101285646:GGGGAGCTCCTGGGCTCAGTGG	22	Long Reads (vamos)	16bp+	2	1.84404	0.540265
chr10:101285772:GCTGCAAGGCTGGA	14	Long Reads (vamos)	7-15bp	2	1.97872	0.0210478
chr10:101286933:TGTTTTCTTGTTTGTT	16	Long Reads (vamos)	16bp+	2	2.10714	0.120912
chr10:101287252:GAGTACAATGTTAATGACCCTGCG	24	Long Reads (vamos)	16bp+	2	2	0
chr10:101288488:GATTATCCTGTAGTGGTGGGCACCTACCCATGCAGCCTCCCCGGACATCTATGGGCTAGCAGCTCCAGCAGGGGGTGTCCCTCCAGGGA	89	Long Reads (vamos)	16bp+	2	2	0
chr10:101293743:TTTTC	5	Long Reads (vamos)	4-6bp	12	11.6934	1.44944
chr10:101296194:TAT	3	Long Reads (vamos)	2-3bp	11	10.7434	1.31748
chr10:101310652:GCTCCATCGC	10	Long Reads (vamos)	7-15bp	3	3.01163	0.0116279
chr10:101313942:CCCAGGCTGGAGTGCAATGGTACAATCTCAGCTCACTGCAACCTCCACCTCCTGGGTTTAAGATATTCTCCTCCCTCAGCCTCCCGAGTAGCTGGAATTACAGGCGTCCACCACCACACCTGGCTAATTTTTTGTATTTTTAGTAGAAACAGGGTTTCACCATGTTGGCCAGGCTGCTCTCGAACTCCTGACCTCAGGTGGTCTACCTGCCTCAGCCTCCCAGAGTGCTGGGATTACAGGCATAAGCCACCATGCCTGGCCTTTTTTTTTTTTTGAGACAGAGTCTCGCTCTTTGG	296	Long Reads (vamos)	16bp+	2	2	0
chr10:101316297:AAAAAT	6	Long Reads (vamos)	4-6bp	5	5	0.244275
chr10:101316479:AAAAG	5	Long Reads (vamos)	4-6bp	8	7.67407	2.05716
chr10:101316953:TCCT	4	Long Reads (vamos)	4-6bp	41	43.1791	20.6895
chr10:10131830:TGTGTATATATATA	14	Long Reads (vamos)	7-15bp	5	4.41026	0.485411
chr10:101324579:TAAA	4	Long Reads (vamos)	4-6bp	6	6.26042	0.489364
chr10:101324700:CCTT	4	Long Reads (vamos)	4-6bp	20	19.2336	4.95975
chr10:101337085:TTTTTTGTTGTT	12	Long Reads (vamos)	7-15bp	2	1.98131	0.0373832
chr10:101338865:TCGCCCAGGCTGGAGTGCAGTGGTGCGATCTTGGCTCACTGCAACCACCATCTCCTAGATTCAAGTGATTCTCCTGCCTCAGCCTCCCA	89	Long Reads (vamos)	16bp+	2	1.81522	0.152293
chr10:101347214:TATACATAAACACATATATACA	22	Long Reads (vamos)	16bp+	3	2.74	0.194343
chr10:101347579:TTTTTTTTTTTTTTTTTTTTTTTGAGACTGAGTCTCGCTCTGTCACCCAGGCTGGAGTGCAGTGGCATGATCTCGGCTCACTGCAACCTCCGCCTCCTGGGTTCAAGCGATTCTCCTGCCTCAGCCTCCCAAGAGGCTGGGACTACAGGCGCACACCACCATGCCCGACTAAT	173	Long Reads (vamos)	16bp+	2	2	0
chr10:101349885:GGTGGCTCACGCCTGTAATCCCAGCACTTTGGGAGGCTGAGGCGGGTGGATCATGAGGTCAGGAGATAGAGATCATCCTGGCTAACACAGAGAAACCCCGTCTCTACTAAATATACAAAAAATTAGCCAGGCGA	134	Long Reads (vamos)	16bp+	2	2	0
chr10:101366766:TATTTATATA	10	Long Reads (vamos)	7-15bp	31	34.5693	113.423
chr10:101372233:TTTTCT	6	Long Reads (vamos)	4-6bp	8	7.51111	2.01294
chr10:101375257:CCTCTCTTCCCC	12	Long Reads (vamos)	7-15bp	3	2.82569	0.14526
chr10:101380488:GGGCAGAGGCACTCCCCACTTCCCAGACAGGGCAGCGGCT	40	Long Reads (vamos)	16bp+	2	2	0
chr10:101383497:TTCCTTTCTTTCC	13	Long Reads (vamos)	7-15bp	4	3.77049	0.194825
chr10:101388026:GCAAAAATATACTAAA	16	Long Reads (vamos)	16bp+	2	2	0
chr10:101388330:TTTTA	5	Long Reads (vamos)	4-6bp	8	8.53488	0.547602
chr10:101390264:GGGAATAAATCAAACAATGTTTAT	24	Long Reads (vamos)	16bp+	2	2	0
chr10:101392680:TAGTAGAGACAGGGTTTCACCA	22	Long Reads (vamos)	16bp+	2	2	0
chr10:101398291:TTTCTTTT	8	Long Reads (vamos)	7-15bp	4	4.05505	0.27472
chr10:101399640:TTTGCAAACAGAAG	14	Long Reads (vamos)	7-15bp	2	2	0
chr10:10140060:TAGTATGTTC	10	Long Reads (vamos)	7-15bp	3	2.98876	0.011236
chr10:101406934:ATCATCTGTCCTG	13	Long Reads (vamos)	7-15bp	3	2.98795	0.0120482
chr10:101413195:CTCACTGCAACCTCTGCCT	19	Long Reads (vamos)	16bp+	2	2	0
chr10:101415461:TTTAT	5	Long Reads (vamos)	4-6bp	11	11.2521	5.69862
chr10:101416546:GTT	3	Long Reads (vamos)	2-3bp	10	9.44248	0.766751
chr10:101417670:TATTTTATTTCATTT	15	Long Reads (vamos)	7-15bp	2	2	0
chr10:101427502:TTCTTCTCTTTCTTCTCTTACT	22	Long Reads (vamos)	16bp+	2	2.09	0.0827273
chr10:101429536:TTCTCTCTCCTTT	13	Long Reads (vamos)	7-15bp	8	7.79389	0.38027
chr10:101435159:TTATTTACCTAGATTTTTATTTAGGTAAA	29	Long Reads (vamos)	16bp+	2	2	0
chr10:101436625:ATAG	4	Long Reads (vamos)	4-6bp	12	11.3814	3.46871
chr10:101449522:AAATATGGCAGCAAAGA	17	Long Reads (vamos)	16bp+	2	1.9878	0.0368865
chr10:101456807:GCACTGAGCTAAGAAATAAATATTTGAGTTAATATAAAAGGTAACAAGTTGT	52	Long Reads (vamos)	16bp+	2	2	0
chr10:101462874:TTTTTTTTTTTGAGACACAGTCTTGCTCTATCGCCCAGGCTGGAGTGCAGTGGTGTGATCTTGGCTCACCACAACCTCCACCTCCAGGGTTCAAGCGACTCTTCTGCCTCAGCCTCCTGCGTAACTGGGACTACAGGTGCCCACTACCACACCGGGCTAATTTTTGTATTTT	172	Long Reads (vamos)	16bp+	3	3	0
chr10:101469222:GGAAAATATTGAAT	14	Long Reads (vamos)	7-15bp	2	2.01429	0.0142857
chr10:101472275:TCTCT	5	Long Reads (vamos)	4-6bp	15	15.4351	7.04768
chr10:1014751:TTGAGATTCGCTGGCCCTGGGACTGACTTGAAGTGATGGG	40	Long Reads (vamos)	16bp+	2	2	0
chr10:10147912:ACACACACACACTCCTCTCTC	21	Long Reads (vamos)	16bp+	2	1.97183	0.0277666
chr10:10148498:AAAC	4	Long Reads (vamos)	4-6bp	9	9.04065	0.318006
chr10:1014970:GTTTCCGTCTGATG	14	Long Reads (vamos)	7-15bp	2	2	0
chr10:101505619:AAAAAAA	7	Long Reads (vamos)	7-15bp	3	2.75373	0.608069
chr10:101511168:CCTTAATTCCCACCATTTT	19	Long Reads (vamos)	16bp+	2	2	0
chr10:101511545:TTTTG	5	Long Reads (vamos)	4-6bp	6	5.93333	0.175281
chr10:101517427:AAATAAAAGAAAAT	14	Long Reads (vamos)	7-15bp	2	1.96386	0.035263
chr10:101522352:AAAACAAAAAA	11	Long Reads (vamos)	7-15bp	3	2.69697	0.701365
chr10:101523206:AAAT	4	Long Reads (vamos)	4-6bp	8	8.04211	0.274804
chr10:10152408:TTCTT	5	Long Reads (vamos)	4-6bp	11	10.2331	3.77102
chr10:1015346:CTGAGCCTGGGAGCGGGGCTGGGGTCCTGAGCG	33	Long Reads (vamos)	16bp+	14	14.4737	6.52392
chr10:101550265:TATTTTTATTTTATT	15	Long Reads (vamos)	7-15bp	2	2.21212	0.189239
chr10:101552154:TTTTA	5	Long Reads (vamos)	4-6bp	9	9.22222	0.256236
chr10:10155576:TTCTTTT	7	Long Reads (vamos)	7-15bp	4	4.22047	0.76053
chr10:101567752:AGACCCATGAGGCCTGGGCTAGCCTA	26	Long Reads (vamos)	16bp+	2	2	0
chr10:101570423:GCCCCGCACCCG	12	Long Reads (vamos)	7-15bp	3	2.92473	0.07036
chr10:101575576:TGCCCACGTCTGCCTTGTGAGCAGCTGGAACCCAGGAGGAAAGGCCGGGGCCTGTCTTGCTCCCCTTT	68	Long Reads (vamos)	16bp+	2	1.98592	0.0140845
chr10:101579255:GGGCAGACACTGGGAGCC	18	Long Reads (vamos)	16bp+	2	2	0
chr10:101581974:TTTTTGTATGTTTTATAGAGACAGGGTTTCACCACGTTGGCCAGGCTGG	49	Long Reads (vamos)	16bp+	2	2	0
chr10:101586464:TTTGTTTTGTTTTCT	15	Long Reads (vamos)	7-15bp	3	3.02778	0.0272586
chr10:101600688:TCTCATCCCGATGCTTGCT	19	Long Reads (vamos)	16bp+	2	2	0
chr10:101601781:TTTAAAGCAGACTGGGCAGCAG	22	Long Reads (vamos)	16bp+	2	2	0
chr10:101610256:CAAAA	5	Long Reads (vamos)	4-6bp	10	9.87879	0.779089
chr10:10161363:ACCAATCAGCACCCTGTGTCTAGCTCGGGGTTCATGAATGCACCAATCAGCACTCTGTATCTAGCTAATCTGGTGGGGACTTGGAGAACTTTTATGTCTAGCTAAAGGATTGTAAATACACCAATCAGCACTCTCTGTCTAGCTCAAGGTTTGTAAACCC	160	Long Reads (vamos)	16bp+	3	2.96581	0.0505452
chr10:101616037:CTCCAGAGACCTATG	15	Long Reads (vamos)	7-15bp	3	2.95918	0.0601725
chr10:10162063:GGGAGGAACGAACAATTCCAGA	22	Long Reads (vamos)	16bp+	2	2	0
chr10:101624069:CACA	4	Long Reads (vamos)	4-6bp	8	8.2623	6.60832
chr10:101633668:TTATTATATACCAGCAATAACCAAGTG	27	Long Reads (vamos)	16bp+	5	5	0
chr10:101634123:AAATAAAATAA	11	Long Reads (vamos)	7-15bp	2	2.09211	0.0847368
chr10:101640710:TGGTCTCAAACTCCTGGC	18	Long Reads (vamos)	16bp+	2	2	0
chr10:1016757:GATAACTGTGCTGGGCTTAAGAGAAAAGAGATGTAACAGG	40	Long Reads (vamos)	16bp+	5	4.95575	0.0962389
chr10:101679106:GCCCAGGCTGGTCTCCAACACCTGGCCTCAAGCAATCCTCCTGC	44	Long Reads (vamos)	16bp+	2	1.98837	0.0116279
chr10:101681092:ACTAACAGGTCTAGGCTGGGCGCGGTGGCTCACGCCTGTAATCCCAGCACTTTGGGAGGCCGAGGCAGGCGGATCACGAGGTCAGGAGACAGAGACCATCCTGGCTAACGCAGTGAAACCCCGTCTCTACTAAAAATACAAAAAATTAGCCAGGCGTGGTGGCGGGCGCCTGTAGTCCCAGCTACTCGGAAGGCTGAGGTAGGAGAATGGCATGAACCCGGGAGGCAGCGCTTGCAGTGAGCTGAGATCGCGCCACTGCACTCCAGCCTGGGCGACAGAGCGAGACTCCGTCTCAAAATAATAATAATAATAATAATAATAATAATAATAAT	332	Long Reads (vamos)	16bp+	2	2	0
chr10:101687773:CCCTTGCCCAATAT	14	Long Reads (vamos)	7-15bp	2	1.95833	0.040493
chr10:101697116:TTTTTTTTTGAGACAGAGTCTGGCTCTGTCGCCCAGGCTGGAGTGCAGTGGCGCAATCTCGGCTCACTGCAAGCTCCACCACCCGGGTTCACGCCATTCTCCTGCCTCAGCCTCCCGAGTAGCTGGGACTACAGGCGCCCGCCACTATGCCCGGCTAATTGTTTTGTATTTTTAGTAAAGACGGGGTTTCACAGTGTTAGCCAGGATGGCCTCGATCTCCTGACCTCGTGATCCGCCTGTCTCGGCCTCCCAAAGTGCTGGGATTACAGGCATGAGCCACCTTGCCCGGCCTTTTTCTTTTTTTT	305	Long Reads (vamos)	16bp+	2	1.98592	0.0140845
chr10:101697746:CATCATTAAAGCGGCCGGGCG	21	Long Reads (vamos)	16bp+	2	1.83544	0.139241
chr10:101700105:CCAGGAGTTCAAGACCAGCCT	21	Long Reads (vamos)	16bp+	2	2	0
chr10:101700497:CTTCATTTT	9	Long Reads (vamos)	7-15bp	4	4	0.103093
chr10:101705007:CCTGTAGTCCCAGCTACTTGGGAGGCTGAGACAGGAGAATTGCTTAAACCCGGAAGGCGGAGGTTGCAGTGAGTCTACATCACACCACTGTACTCCAGCCTGGGCAATGGAACGAGACTAAATCTCAAAAAACAAACAAA	140	Long Reads (vamos)	16bp+	4	3.82474	0.146048
chr10:101714890:TGTTT	5	Long Reads (vamos)	4-6bp	7	7.02609	0.218612
chr10:101715074:TTTTA	5	Long Reads (vamos)	4-6bp	13	14.2308	4.34943
chr10:101718117:AAAT	4	Long Reads (vamos)	4-6bp	7	7.1215	0.353024
chr10:101730675:CCTTTGCCCATTTTTTTTTTTTTTTTTTGAGACAGAGTGTCACTCTGTCACCCAGGCTGGAGTGCAATGGCACAATCTTGGCTCTCTGAAATCTCCGCCTCCTGGGTTAAAGTAATTCTTCTGTCTCAGCCTCCCGAGTAGCTGGGACTACAGGCGCGTGCCACCACACCCACTAATTTTTGTATTTTTAGTACAGATGGGGTTTCACCATATTGGCCAGGCTGGTCTCGAACTAATGACCTAGTGATCCACCCACCTCAGCCTCCCAAAGTGCTGGGATTACAGGTGTGAGCCACCATGCCCAGCC	307	Long Reads (vamos)	16bp+	2	2	0
chr10:101731342:ATCACCTCAGGTGATCCACCCGCCTCAGCCTCCCA	35	Long Reads (vamos)	16bp+	2	2.02703	0.0540541
chr10:101738497:AAAAAG	6	Long Reads (vamos)	4-6bp	6	6.43704	2.36727
chr10:101739836:AGAAGGGAGAGG	12	Long Reads (vamos)	7-15bp	3	2.92661	0.087156
chr10:10174108:TTTTGCCCAAATAT	14	Long Reads (vamos)	7-15bp	3	2.97753	0.0222165
chr10:101751973:AAAT	4	Long Reads (vamos)	4-6bp	10	10.5794	1.32146
chr10:101752663:TTCC	4	Long Reads (vamos)	4-6bp	8	8.09259	0.439945
chr10:101755590:TCTCTAACTTCTTTCTCTGTG	21	Long Reads (vamos)	16bp+	2	1.98571	0.0142857
chr10:101756056:TTTG	4	Long Reads (vamos)	4-6bp	7	7.05714	0.477473
chr10:101764188:GCCTGTAGTCCCAGCACTTTGGGAGGCTGAGGCGGGCGGATCATTTGCGATCTGGAATTCGAGACCAGCCTGACCAACATGGTGAGATTCTGTCTCTAATAAAAGTACAAAAAAAACCCAAAAAATTAGCCGGGTATGGTGGCGCCT	147	Long Reads (vamos)	16bp+	3	3	0
chr10:101777476:CTGTGCCCCATCTTTCC	17	Long Reads (vamos)	16bp+	2	1.98718	0.0128205
chr10:10177778:CCTTCCCTCCCTTCTCATTCCTTCT	25	Long Reads (vamos)	16bp+	7	7.29457	0.334423
chr10:101791673:ATTTATTTTTTTTTTTGAGACGGAGTCTCGCTCTGTCGCCCCAGGCTGGAGTGCAGTGGCATGATCTCGGCTTACTGCAAGCTCTGCCTCCCGGGTTCAAGCCATTGTCCGGCCTCAGCCTCCCGAGTAGCTGGGACTATAGGCACCCACCACCGCACCCAGCTAATTT	169	Long Reads (vamos)	16bp+	3	2.98667	0.0133333
chr10:101793189:AAAAAC	6	Long Reads (vamos)	4-6bp	4	4.05063	0.125609
chr10:101803449:AAAAAAAAAAAAAC	14	Long Reads (vamos)	7-15bp	2	2.02308	0.115742
chr10:101805270:CTCAGGCTCCCCA	13	Long Reads (vamos)	7-15bp	2	1.94521	0.0525114
chr10:101805395:TGTAATCCCAGCACTTTGGGAGGCCAAGGCGGGTGGATCACGAGGTCAGGAGATCGAGACCATCCTGGCTAACATGGTGAAACCCTGTCTCTACTAAAAATACAAAAAATTAGCCAGGCGTGGTGGCGGGTGCCTGTAGTCCCAGCTACTCGGGAGGCTGAGGCAGGAGAATGGTGTGAACCTGGGAGGCGGAGCGTGCAGTGAGCCGAGATCATGCCACTGGACTCCATCCTGGGCGACAGAGTGAGACTCCGTCTCAAAAAAAAAA	268	Long Reads (vamos)	16bp+	2	2	0
chr10:101811388:AAAAAAATGA	10	Long Reads (vamos)	7-15bp	5	4.76744	0.726744
chr10:101812409:AAAAC	5	Long Reads (vamos)	4-6bp	5	5.01282	0.116717
chr10:10181333:TATATATACATATATACATATATATATAATATATATAT	38	Long Reads (vamos)	16bp+	2	2	0
chr10:1018158:GCTCAAGCCTGTAGTTCCAGCACTTTGGGAGGCCGAGGTGGGCAGATCAGGAGGTCAGGAGTTCGAGACCAGCCTGGCCAACATGGTGAAACCCCATCTCTACTAAAAATACAAAAATTAGCCATGCGTGGTGGTGGGCATCTGTAATCCTAGCTGCTCGGGAGGCTAAGGCAGGAGAATTGCTTGAGCCCAGAGGCGGAGGTTGCAGTGAGCCGAGATCGTGCCACTGCACTCCAGCCTGAGTGACAGAGAGAGACTCCGTGTGAAAAAAAAAAAAAAAATACCAGGTCTGGTTTTTGAAATTCTTTCTCCGTATTAAACACCAAAACTTAACATATAGTTTACTTTGTGTTAAACAACAACAGTATGGCCGGGCGCGGCA	382	Long Reads (vamos)	16bp+	2	2	0
chr10:101829613:CCCTCCCCTCGCCCCGCCCAGC	22	Long Reads (vamos)	16bp+	2	1.975	0.0246835
chr10:101830681:CACACACACACACACGCACGCAGGCCTGGGGCACGCCCCTCCCCCACACGCAGGCGTGCGGCACGCCTCCC	71	Long Reads (vamos)	16bp+	2	1.98889	0.0111111
chr10:101830887:ACACACGCACAGGCCTGGGGCAGGCCCCACCCCC	34	Long Reads (vamos)	16bp+	2	2.02609	0.060717
chr10:10183546:AATACTATGCAATAT	15	Long Reads (vamos)	7-15bp	3	3	0
chr10:101837669:ATAATAATAATG	12	Long Reads (vamos)	7-15bp	2	2	0.0285714
chr10:101849690:CTGCAGATAAA	11	Long Reads (vamos)	7-15bp	3	2.76667	0.180899
chr10:101850080:TCTCTCTCTCTTTTTTTTTTTTTTTTTTTTTTTTTGAGACTGAGTCTTGCTCTGTCGCTCAGGCTGGAGTACAGTGACGTGATCTCAGTTCACTGCAACCTCTGCCTCCCAGGTTCAAGCGATTCTCCTGCCTCAGCCTCCCGAGTAGCTGGGACGACAGGGGCACATCACCACACCTGGCTGTTTTTTATATGTTTTAGTAGAGATGGTGTTTCGCCATGTTGGCCAGGCTGGTCTCGAACTCCTGACCTCAGGTGATCCACCTGCCTTGGCCTCCCAAAGTGCTGGGAGTACGGGTGTGAGCCATTGAGCCTGGCCAACTTTCTAA	328	Long Reads (vamos)	16bp+	2	2	0
chr10:101852753:AAAGAAAAAGAAAAGA	16	Long Reads (vamos)	16bp+	3	2.55372	0.31584
chr10:101854151:CTCTTGTTATGGGACTTCAGACAATTCACCTAGC	34	Long Reads (vamos)	16bp+	2	2	0
chr10:101855953:GTGCTCAACCCAGTGCAGGCT	21	Long Reads (vamos)	16bp+	2	2	0
chr10:101860241:ATATAG	6	Long Reads (vamos)	4-6bp	5	4.96078	0.0776548
chr10:101866897:AAAC	4	Long Reads (vamos)	4-6bp	11	11.0242	0.96689
chr10:101872222:GTGTGTGTGTGTGTGTGTGTGTAACAAC	28	Long Reads (vamos)	16bp+	2	1.9798	0.040404
chr10:10187270:TTATAAATTTTTTTATTTTTTAC	23	Long Reads (vamos)	16bp+	2	2	0
chr10:101873409:AAAAAAACAA	10	Long Reads (vamos)	7-15bp	3	3.14634	0.191523
chr10:101878638:AAGAAAAAAAAACAAAAA	18	Long Reads (vamos)	16bp+	2	2.02222	0.0669164
chr10:101884757:AACAA	5	Long Reads (vamos)	4-6bp	9	8.77419	1.05429
chr10:101896231:AAAC	4	Long Reads (vamos)	4-6bp	8	7.84404	0.540265
chr10:10191319:GATG	4	Long Reads (vamos)	4-6bp	9	9	0.627451
chr10:101918036:GTTTGTTTGTTT	12	Long Reads (vamos)	7-15bp	3	2.54054	0.250614
chr10:101919188:CCTTTCTTCTCTCCTTCTCTC	21	Long Reads (vamos)	16bp+	2	2	0
chr10:10191998:GTAT	4	Long Reads (vamos)	4-6bp	14	13.6794	0.773341
chr10:101928712:TTTGTTGTTGTTGTTG	16	Long Reads (vamos)	16bp+	2	2	0.0421053
chr10:10193015:TTATATATAAATTATAAATCATATATA	27	Long Reads (vamos)	16bp+	4	3.6789	0.220014
chr10:10193116:ATGTAAAATTATATGT	16	Long Reads (vamos)	16bp+	2	2	0
chr10:10193178:CATATATATATGTATATAGGTATAATATACATATATACATATATACATATATG	53	Long Reads (vamos)	16bp+	11	11.0963	1.65484
chr10:101947796:AAAT	4	Long Reads (vamos)	4-6bp	10	10.0851	0.616335
chr10:101950261:AGATAACAGGACACAAGATTAAAAATCAGCA	31	Long Reads (vamos)	16bp+	2	2	0
chr10:101961541:GGTTTAGGCCAAAGAAGA	18	Long Reads (vamos)	16bp+	2	2	0
chr10:101962970:TTTTTTTTTTTTTTTTTGAGACAGAGCTCAACTCTGTCACCCAGACTGAAGTGCAGTGGCATGATCTTGTCCCACTGCAACCTCCACCTCCCGGGTTCAAGAGATTCTCCTGCCTTAGCCTCCCAAGTAGCTGGGATTACAGGAACCCATCACCATGCCCGGATAATTTTGCA	173	Long Reads (vamos)	16bp+	2	2	0
chr10:101963572:TTTACTTATTTGTTTTTATTT	21	Long Reads (vamos)	16bp+	2	1.98649	0.0135135
chr10:101966285:GTTTTTTTTT	10	Long Reads (vamos)	7-15bp	3	2.7395	0.618003
chr10:101971553:AAAAT	5	Long Reads (vamos)	4-6bp	5	5.0274	0.0547945
chr10:101975469:CCTGTAATCCCAGCACTTTGGGAGGCCGAGGCAGGCAGATCACAAGGTCAGGAGTTTGAGACAAGCTTGGCCAATATGGTGAAACCCCATCTCTACTAAAAATACAAAAA	110	Long Reads (vamos)	16bp+	2	2	0
chr10:101976962:TTTCTTTTC	9	Long Reads (vamos)	7-15bp	4	3.86719	0.179072
chr10:101981177:AAGAAAAAGAAAAAAA	16	Long Reads (vamos)	16bp+	2	2.0241	0.0481928
chr10:101985078:ACACACACGTGTACATATATAT	22	Long Reads (vamos)	16bp+	3	2.92473	0.244273
chr10:101989720:AAAACA	6	Long Reads (vamos)	4-6bp	5	5.256	0.417806
chr10:102002960:AAAT	4	Long Reads (vamos)	4-6bp	11	10.8125	1.03543
chr10:102004810:TGTAATCCCAGCACTTTGGGAGCCCGAGGCAGGCGGATCACCTGAGGTCAGGAGTTCGGGACCAGCCTGGCCAATACAGTGAAACCCCATCTCTACTAAAAATACAAAAATTGGCCAGGCGTGGTGGCTCACGCC	135	Long Reads (vamos)	16bp+	2	2	0
chr10:102007159:AAAAAAAAAG	10	Long Reads (vamos)	7-15bp	3	3.14504	0.817264
chr10:102008508:TTTTGTTATGTTTTGTTTTTATTTTA	26	Long Reads (vamos)	16bp+	3	2.9	0.225843
chr10:102008716:TAATTTTTTTTT	12	Long Reads (vamos)	7-15bp	2	2.32231	0.236915
chr10:102010228:CCTACTAAATCA	12	Long Reads (vamos)	7-15bp	3	3	0
chr10:102011048:TTCTAGAATCTCCTAGA	17	Long Reads (vamos)	16bp+	2	1.98765	0.0123457
chr10:102011899:AAGCATCATGACAATC	16	Long Reads (vamos)	16bp+	2	2	0
chr10:102021383:ATTTTTTTTTTTTTTTAAAGACAGGGTCTCACTATGTCACCCAGACTGGAGTGCAGTGGTGTAATCATGGCTCACTGTAGCCTCAAACTCCTGGGCTCAAGCAATCCTCCTGCTTCAGCCTCTCAAGTAGCTGAGACTACAGATGCATATCACCACAACCAGCTA	165	Long Reads (vamos)	16bp+	2	2	0
chr10:102024551:GGTGGATCACCTAAGGTCAAGAGTTCAAGCG	31	Long Reads (vamos)	16bp+	2	2	0
chr10:102025630:TTTCT	5	Long Reads (vamos)	4-6bp	6	6.19417	0.863887
chr10:102034908:AAAAACAAAAATAAATAAATA	21	Long Reads (vamos)	16bp+	2	2.01282	0.0128205
chr10:102035387:TCTCCCTCTCCCTCTCTTTCCACAG	25	Long Reads (vamos)	16bp+	2	1.98734	0.0126582
chr10:102041075:ATATATATATATATATA	17	Long Reads (vamos)	16bp+	2	2.07407	0.218761
chr10:102050453:AAAT	4	Long Reads (vamos)	4-6bp	10	9.53782	0.759151
chr10:102051473:GAAAAA	6	Long Reads (vamos)	4-6bp	5	5.3609	1.21725
chr10:102054995:CAAA	4	Long Reads (vamos)	4-6bp	11	11.0593	1.62333
chr10:102055298:AAAT	4	Long Reads (vamos)	4-6bp	10	10.0079	0.839937
chr10:1020566:GCCCCATCCACA	12	Long Reads (vamos)	7-15bp	7	6.89474	0.0950163
chr10:102060371:TTTTTTTCTTT	11	Long Reads (vamos)	7-15bp	3	2.91667	0.345938
chr10:102064025:AAAAATAAAAATAAA	15	Long Reads (vamos)	7-15bp	2	2	0.0285714
chr10:102068014:AATATATACACAGTT	15	Long Reads (vamos)	7-15bp	2	1.98701	0.012987
chr10:102069689:CAGGACTTTGGAAACAGCACAGGGAT	26	Long Reads (vamos)	16bp+	2	2	0
chr10:102071594:TCCAGTCTTCTCT	13	Long Reads (vamos)	7-15bp	2	1.94521	0.0525114
chr10:102072784:TAAA	4	Long Reads (vamos)	4-6bp	7	6.90722	0.272552
chr10:102077967:AAAT	4	Long Reads (vamos)	4-6bp	6	6.25581	0.333789
chr10:102086467:TTTTTTTTTTTTTGAGACGGAGTCTCGCTGTGTCGTCCAGGCTGGAGTGCAGTGGTGTGATCTCGGCTCACTGCAAGCTCCACCTTTCCGGTTCACTCCATTCTCCTGCCTCAGCCTCCCAAGTAGCTGGGACTACAGGCGCCGCCACCATGCCCAGCTAATTTTTTTTTGTATTTTTAGTAGAGACGGGGTTTCACCATGTTGGCCAGGATGGTCTCGATCTCCTGACCTCGTGATCAGCCCGCCTAGGCCTCCCAAAGTGCTGGGATTACAGGCGTGAGCCACCGCACCCGGCCAGTGCTC	303	Long Reads (vamos)	16bp+	2	2	0
chr10:102087302:TTAT	4	Long Reads (vamos)	4-6bp	7	6.89796	0.443089
chr10:102092506:CCAATCTTCTTGTTACCA	18	Long Reads (vamos)	16bp+	2	2	0
chr10:102093285:AAAAAAAGAAAA	12	Long Reads (vamos)	7-15bp	3	3.25	0.494275
chr10:102096059:TTGAACTCCTGACCTCAGGTT	21	Long Reads (vamos)	16bp+	2	2	0
chr10:102097169:AAAT	4	Long Reads (vamos)	4-6bp	16	15.9421	0.588292
chr10:102098426:TTTTTTTTTTCTTTGAGATGGAGTCTCGCTCTTTCACCATGCAGTGGCATGATCTCAGCTCACTGCAACTTCCACCTCCTGGGTTCAAGCGATTCTCCTGCCTCAGCCTCCCGAGTAGCTGGGACTACAGGCGGCTGCCACCACGCACAGCTAATTTTTGTATTTTTTAGTAGAGATGGGGTTTCACCATGTTGGCTAGGCTGGTCTTGAACTCCTGACCTCAGGTGATCTGCCCGCCTCGGCCTCCCAAAGTGCTGGGATTACAGGCATGAGCCACCTCGCCCAGGCTC	290	Long Reads (vamos)	16bp+	3	3	0
chr10:102103325:TGT	3	Long Reads (vamos)	2-3bp	10	10.2773	1.06651
chr10:10210372:TTTTTGT	7	Long Reads (vamos)	7-15bp	4	4.38095	0.349714
chr10:102120364:GTGTGTGC	8	Long Reads (vamos)	7-15bp	5	4.64228	0.346395
chr10:102125105:TTTTTGAGACAGAGTCTTGCTCTGTCACCAGGCTGGAGTGCAGTGGCACTATCTCAACTCACTGCAACCTCCGCCTCCTGGGTTGAAGCAATTCCCCTGCCTCAGCCTCCTGAGTAGCTGGGATTATAGGCATGAGCCACCACACC	146	Long Reads (vamos)	16bp+	2	2	0
chr10:102128536:AAGAGAGAC	9	Long Reads (vamos)	7-15bp	4	3.95968	0.104052
chr10:102128598:CAGCGGCAGTCTTTTTTTTTTTTTTTTTTTTTTTTTGAGACGGAGTCTCGCTCTGTCACCCAGGCTGGAGTGCAGTGGCGCGATCTCGGCTCACTGCAAGCTCCGCCTCCCGGGTTCACGCCATTCTCCTGCCTCAGCCTCCCGCGTAGCTGGGACTACAGGCGCCCGCCACCACGCCCGGCTAATTTTTTTGTGTTTTTTAGTAGAGACGGGGTTTCACTGTGTTAGCCAGGATGGTCTCGATCTCCTGACCTCGTGATCCGCCCGCCTCGGCCTCCCAAAGTGCTGGGATTACAGG	298	Long Reads (vamos)	16bp+	2	2	0
chr10:102130134:GGCTGGGCGCAGTGGCTCACGCCCGTAATCCCAGAACTTTGGGAGGCTGAGGCAGGCAGATCACCTGAGGTCAGGAGTTTGAGACCAGCCAGACCAACATGGAGAAACCCCCTCTCTACTAAAAATACAAAATTAGCTGGGCGTGGTGGCACATGCCTGTAACCCCAGCTACTCAGGAGGCTGAGGCACAAGAATCACTTGAACCTGGGAGGCGGAGGTTGCGGTGAGCCGAGATTGCGCCATTGCACTCCAGCCTGGGTGACA	264	Long Reads (vamos)	16bp+	2	2	0
chr10:10214047:TATCTCCTAAATCATTACTTT	21	Long Reads (vamos)	16bp+	2	2	0
chr10:102142112:TTTTTTTTTTTTTTTTTTGAGATGGAGTCTTCCTCTGTCGCCCAGGCTGGAGTGCAGTGGCGTGATCTCGGCTCACCGCAACCTCCGCCTCCCGGGTTCAAGCGATTCTCCTGCCTCAGCCTCCCCAGTAGCTGGGATTACAGGCACTCACACCCACGCCCGGCTTTTTGTATTTTTAGCAGAGATGAGGTTTCACCATGTTGGCCAGGTTGGTCTCAATCTCCTGACCTCGTGATCCGCCTGCCTCAGCCTCCCAAAGTGCTGGGATTA	270	Long Reads (vamos)	16bp+	2	2	0
chr10:102148408:TCTTCCTCTTCGTCTTCCTCA	21	Long Reads (vamos)	16bp+	2	1.97561	0.0240891
chr10:102151586:GCATTGATACTGGAGTTACTCATGACAAAG	30	Long Reads (vamos)	16bp+	2	2	0
chr10:102154626:TGCCTCAGCCTC	12	Long Reads (vamos)	7-15bp	2	2	0
chr10:102156496:CTAGGTTCAAGCAATTCTCCTGCTTCAGCCT	31	Long Reads (vamos)	16bp+	2	1.97333	0.0263063
chr10:102159223:AGCAGCAGT	9	Long Reads (vamos)	7-15bp	4	4.06481	0.0611803
chr10:102160618:AGCAGCTCCAGTGAGGAAGAG	21	Long Reads (vamos)	16bp+	2	1.9899	0.010101
chr10:102167564:TTGTTT	6	Long Reads (vamos)	4-6bp	6	6.53175	1.08298
chr10:10216776:TGTGTGCGTGTG	12	Long Reads (vamos)	7-15bp	3	3.0098	0.0692099
chr10:102170087:GTTT	4	Long Reads (vamos)	4-6bp	8	7.8785	0.29642
chr10:102170792:AAATTCATCCATTCAGAA	18	Long Reads (vamos)	16bp+	2	2	0
chr10:102173130:AAAAC	5	Long Reads (vamos)	4-6bp	8	8.0916	0.730006
chr10:102173440:TTTTTATTTTTTTGAGACGGAGTCTCGCTGTGTCACCCAGGCTGGAGTGCAGTGGCGCCATCTCGGCTCACGGCAAGCTCCACCTCCTCGGGTTCACGCCATTCTCCTGCCTCAGCCTCCCGAGTAGCTGGGACTACAGGTGCCTGCCACCACGCCCAGCTAATGTTTGTATTTTTAGTAGAGACGGGATTTCACTGTGTTAGCCAGGAAGGTCTCGATCACCTGACCTCGTGATCTGCCCGCCTCAGCCTCCCAAAGTGCTGGGATTACAGGCGTGAGCCACTGCGCCTGGCC	294	Long Reads (vamos)	16bp+	2	2	0
chr10:102174202:TTTTC	5	Long Reads (vamos)	4-6bp	7	7.16912	1.48971
chr10:102185662:ATTTT	5	Long Reads (vamos)	4-6bp	7	6.97087	0.16581
chr10:102187259:TGTTTGGAATCTGGAGTTTGC	21	Long Reads (vamos)	16bp+	2	2	0
chr10:102188155:ACGTATGCTGCCCTCAGCAGAGAGGAGGCCCTGGAGAGGATGGCTCCTCTCTGAAGCTGGTC	62	Long Reads (vamos)	16bp+	2	2	0
chr10:102188872:GAGCAGGGAAAGGCCAAGCAGCAA	24	Long Reads (vamos)	16bp+	2	2	0
chr10:102190038:TTTTTTTGAGATGGAGTCTCGCTCTGTTGCCCAGGCTGGAGTGCAATGGTGTGATCTTGACTCACTGCAACCTCCACCTCCTGGGTTCAAGCAATTATCCTGCCTCAGCCTACTGAGTAGCTGGGATTACAGGTGTGCACCACCACTCCCAGCTAATTTTTGTATTTTCAGTATAGATGGGATTTTGCCATGTTGGCCAGGCTGGTCTTGAACTCCTGACCTCAGCTGATCTGCTTGCCTTAGCCTCCCAAAGTGCTAGCCACTGCACCCAGCAAAAGTGCAGTGTACTTTTTAA	295	Long Reads (vamos)	16bp+	2	1.98571	0.0142857
chr10:102191112:TTA	3	Long Reads (vamos)	2-3bp	12	11.9182	1.37857
chr10:102195877:CCTT	4	Long Reads (vamos)	4-6bp	18	17.6866	1.67546
chr10:102198560:TTTA	4	Long Reads (vamos)	4-6bp	7	7.664	0.870065
chr10:102200237:AGCTAGACACAGGGTGCTGACTGGTGTGTTTACAAACCTTGAGCTAGACACAGAGTGCTATTGGTGTATTTACAATCCCTTAGCTAGACATAAAGATTCTCCAAGTCCCCACCAGATT	118	Long Reads (vamos)	16bp+	5	4.98	0.019798
chr10:102207944:TTTGTGTGTTTTCC	14	Long Reads (vamos)	7-15bp	2	1.95833	0.040493
chr10:102221327:TGGGGGGAGAGGGAAAGATGCGTAGAGAGGTAAAGGGGTAAAAGTATGTAGAGTTGTCCATTATGGCTACAATGCGGAATGC	82	Long Reads (vamos)	16bp+	2	2	0
chr10:102227189:CCCCAACCAGGGAGAAGCTATTGCCACACTTCTTACACCACAGCCCTGGGCTGCTTCTAGG	61	Long Reads (vamos)	16bp+	2	2	0
chr10:102233092:TTTTATTTTTC	11	Long Reads (vamos)	7-15bp	3	2.97561	0.0487805
chr10:102233279:CTTCTTTCTTTTTTTTTTTC	20	Long Reads (vamos)	16bp+	2	2.06349	0.139937
chr10:102234630:CCCCTTACTTCATA	14	Long Reads (vamos)	7-15bp	2	1.95833	0.040493
chr10:102244126:CAAA	4	Long Reads (vamos)	4-6bp	11	10.5952	0.962857
chr10:10224700:TTCTTCTGAGCACTCCTGGGTGTC	24	Long Reads (vamos)	16bp+	2	1.98571	0.0142857
chr10:102247671:TTTCTAGATAGGAATAAT	18	Long Reads (vamos)	16bp+	2	2	0
chr10:102251963:CAGGAGTTTGAGAC	14	Long Reads (vamos)	7-15bp	2	2.01429	0.0142857
chr10:102265683:AATG	4	Long Reads (vamos)	4-6bp	7	7.14607	0.239785
chr10:102267502:CAA	3	Long Reads (vamos)	2-3bp	9	8.85841	1.06906
chr10:102271014:TTTTA	5	Long Reads (vamos)	4-6bp	6	5.9899	0.275407
chr10:102273330:AAAAAAAA	8	Long Reads (vamos)	7-15bp	4	3.95833	0.359594
chr10:102274521:CATCACAGACGGACCA	16	Long Reads (vamos)	16bp+	2	2	0
chr10:102275959:GGCGTGGTGGCTCACGCCTGTAATCCCAGCACTTTGGGAGGCCGAGGCAGGTGGATCACCTGAGGTTAGGAGTTCTAGACCAGCCTGGCCAACATGGTGAAACCTCGTCTCTATTAAAAATATGAAAATTAGCCGGGCATGGGTGTGAGCGCCTGTAATCCCAGCTACTGGGGAGGCTGAGGCAGGAGAATCGCTTGAACCTGGGAGGCAGAGATTGCTGTGAGCTGAGATCGCGCCACTGCACTCCAGCCTGGGCAACAGAGGGAGACTCCATCTCCAAAAAAAGGCCT	290	Long Reads (vamos)	16bp+	2	1.98649	0.0135135
chr10:102281518:ATCTATAAATTATATTTATATAAATT	26	Long Reads (vamos)	16bp+	2	2.03797	0.037001
chr10:102281900:TTCTTTTCTTT	11	Long Reads (vamos)	7-15bp	4	4.33913	0.471701
chr10:102285680:GTGAAAATTAGTTTCTTCTTGTGAAAG	27	Long Reads (vamos)	16bp+	2	1.98824	0.0117647
chr10:102287329:TTTTCTTTTT	10	Long Reads (vamos)	7-15bp	4	3.83962	0.783558
chr10:102288723:AAAAAAAAAAAAC	13	Long Reads (vamos)	7-15bp	2	1.94262	0.285937
chr10:102291171:TTTG	4	Long Reads (vamos)	4-6bp	8	7.98958	0.326206
chr10:102294366:TTTTCTTTTTTTTCT	15	Long Reads (vamos)	7-15bp	2	2.21429	0.169884
chr10:102295575:GGGAATAGAA	10	Long Reads (vamos)	7-15bp	2	2.12658	0.111977
chr10:102296451:AAAGAATTGTAGGCCAGGCACAGTGGCTCACACCTGTAATTCCAGCACTTTGGGCAGCCAAGGTGGGCGGATCACTTGAGGCTAGAAGTTCAAGATCAAGCTGGCCAATTTAGTGAAATCCCGTCTCTACTAAAAATACAAAAATTAGCTGGACCTGGTGGCGCGTGCCTATAATTCCAGCTACTTGGGAGGCTGAGGCACAAGGATCGTTTGAACCCGGGAGGCAGAGGTTGCAGTGAGCCTACGTCGCACTACTGTACTCCAGCCTGAGCAACAGAGCGAGACTGTCTCAAAAAAAAAA	301	Long Reads (vamos)	16bp+	2	2	0
chr10:102297920:TTTTGTTTTTGGT	13	Long Reads (vamos)	7-15bp	2	2.05769	0.0548917
chr10:102299884:TTTTATCATTGTTA	14	Long Reads (vamos)	7-15bp	2	2	0
chr10:102301500:TCCCAGACGATGGGCGGCCAGGCAGAGACGCTCCTCACT	39	Long Reads (vamos)	16bp+	10	9.97872	0.0640586
chr10:102305234:GTGAAATAATATTAAGAG	18	Long Reads (vamos)	16bp+	2	1.95833	0.040493
chr10:102307792:CAAAAAAAA	9	Long Reads (vamos)	7-15bp	3	2.92188	0.293061
chr10:102312609:GTTAAAAGATCTTA	14	Long Reads (vamos)	7-15bp	2	2	0.0285714
chr10:102317885:TTAT	4	Long Reads (vamos)	4-6bp	10	10.5484	0.688697
chr10:102319697:TTTCTTTCTTTTTTCTTTTTCTT	23	Long Reads (vamos)	16bp+	2	2.21008	0.184304
chr10:102329986:GTAGTCTTAGCCACTCAGGAGT	22	Long Reads (vamos)	16bp+	2	2	0
chr10:102336299:AAAAAAAAAAAAG	13	Long Reads (vamos)	7-15bp	3	2.70248	0.310744
chr10:102339791:TTTTTTTTTTTTTGAGACAGGATCTCACTTTGTCACCCAGGCTGGAGTGCAGTGGCACGATCTCAGCTCACTGCAGCCTCTACCTCCTGGGTTCAAGATATTCTTTCACCTCAGCCTCCCCAGTAGCTGGGACTACAGGTGCGCGCCACCATGCCCCACTAATTTTTG	168	Long Reads (vamos)	16bp+	2	1.98571	0.0142857
chr10:102344465:GTTT	4	Long Reads (vamos)	4-6bp	7	7.30435	0.477783
chr10:102356361:CCAATCCAAGAATGGT	16	Long Reads (vamos)	16bp+	2	2	0
chr10:102361628:TCCTGTCTAATTTTT	15	Long Reads (vamos)	7-15bp	2	2.01235	0.0123457
chr10:102362035:CTTTTCTTTTTTTT	14	Long Reads (vamos)	7-15bp	3	3.17213	0.457729
chr10:102364166:TAGTAAGGTTCAAA	14	Long Reads (vamos)	7-15bp	2	2	0
chr10:102365875:GATAGAGTGA	10	Long Reads (vamos)	7-15bp	3	2.98684	0.0931579
chr10:102377318:ATTT	4	Long Reads (vamos)	4-6bp	13	10.4435	12.863
chr10:102378217:AAAAGAAAAATAACGAAAGT	20	Long Reads (vamos)	16bp+	2	2.10753	0.118747
chr10:102386469:TTTTTTG	7	Long Reads (vamos)	7-15bp	4	3.88281	0.198757
chr10:102387975:AAAT	4	Long Reads (vamos)	4-6bp	12	12.2295	0.740279
chr10:102388858:AAATAAAAATAAGTAAAAGG	20	Long Reads (vamos)	16bp+	2	2	0
chr10:102397405:CGGGTATGGGTGCAGGGGGTGGGT	24	Long Reads (vamos)	16bp+	2	2	0
chr10:102400850:GGGGCCAAAGATGGTGAA	18	Long Reads (vamos)	16bp+	2	1.97222	0.0273865
chr10:102411323:CTAGTTGCCCCAACGT	16	Long Reads (vamos)	16bp+	2	2.0119	0.0119048
chr10:102414823:CTTCCCCCTCCCA	13	Long Reads (vamos)	7-15bp	2	2.10204	0.0925731
chr10:102418393:TACACATACAGATG	14	Long Reads (vamos)	7-15bp	2	2.04054	0.0668271
chr10:102425421:CCCCCCTACCTCTCCCCA	18	Long Reads (vamos)	16bp+	2	2.26724	0.197526
chr10:102430147:TTTA	4	Long Reads (vamos)	4-6bp	9	9.192	0.930581
chr10:102431122:TTTATTTTA	9	Long Reads (vamos)	7-15bp	4	3.93137	0.0645506
chr10:102437820:AAAAAGAAAA	10	Long Reads (vamos)	7-15bp	5	4.79562	0.546157
chr10:102438734:AGAGACTTCAAGACCCA	17	Long Reads (vamos)	16bp+	2	1.98571	0.0142857
chr10:102439237:AAAAAAAGTAAAATCAAAGCCAGGTGCGGCCGGGCGCAGTGGCTCATGCCTGTAATCCCTGCACTTTGGGAGGCCGAAGCGGGTGGATCACGAGGTCAGGAGATCAAGACCATCCTGGCTAACATGGTGAAACCCCGTCTCTACTAAAAATACAAAAAATTATCCGGGCACGGTGGCGGGCGCCTGTAGTCCCAGATACTCGGGAGGCTGAGGCAAGAGAATGGCTTGAACCTGGGAGGCGGGGCTTGCAGTGAGCCGAGATCACGCCACAGCACTCCAGCCTGGGCGACAGAGCGAGACTCTGTCTCAAAAAAAAAAAAA	321	Long Reads (vamos)	16bp+	3	3	0
chr10:102444792:ACAAA	5	Long Reads (vamos)	4-6bp	5	5.12069	1.6027
chr10:102446681:AAAAT	5	Long Reads (vamos)	4-6bp	8	8.19531	0.300135
chr10:102447013:ATACATACATACATATATATAT	22	Long Reads (vamos)	16bp+	3	2.99038	0.00961538
chr10:102449134:GCCGGGCCGAGACATTCATCTTAACTTCCAATTAG	35	Long Reads (vamos)	16bp+	2	1.94059	0.0564356
chr10:102449641:TTGTTTTTGTTTTTG	15	Long Reads (vamos)	7-15bp	2	2.01087	0.0108696
chr10:102452043:TTTTTTTTTTTTTTTTTTTTGAGATGGGGTCTTGCTCTGTTGTCTAGGCTGGAGTGCAGCGGCATGATCTCGGCACACTGCAGCCACCGTCTTCCAGGTTCAAGCGATTCTCCCACCTCAGCCTCCCGAGGAGCTGGGATTACAGGTGCACCACCACCTCCTGCTAATTTTTGTAGTTTTAGTAGAGACGGGGTTTTCACTATGTTGGCCAGGCTGGTCCCGAACTCCTGACCTCAGGTGATCCACCCTCCTTGGCTTCCCAAAGTGCTGATTTTACAGGCGTGAGCCATCGCGCCCGGCTGCTTTAAATTCTTTTCTTCCT	322	Long Reads (vamos)	16bp+	2	2	0
chr10:102454314:TTTTTTTTTCTT	12	Long Reads (vamos)	7-15bp	2	2	0.106195
chr10:102458970:TTTTCTT	7	Long Reads (vamos)	7-15bp	6	6.25362	0.760023
chr10:102465098:AAAGAAAAAAAATTAGCCGAGTGTGGTGGCAGGCGCCTGTAATCCCAGCTACTGAGGAGACTGAGGAAGGAGAATTGCTTGAACCCAGGAGGCGGAGGTTGCAGTGAGCTGAGATTGAGCCACTGCACTCCAGCCTGCGTGACAGAGCGAGACTCCATCTTTAAA	165	Long Reads (vamos)	16bp+	2	2	0
chr10:102476234:TTTTTGTATTATTTAGTAGAGACAGGGTTTCACCACATTGGCCAGGCTGGTCTCGAACTCCTGACCTCAAGTGATCTGCCTGCCTTGGTCTCCCAAAGTGCTGGGAATACAGGCATGAGCCAC	123	Long Reads (vamos)	16bp+	2	2	0
chr10:102494800:TTAATT	6	Long Reads (vamos)	4-6bp	4	4.14118	0.289356
chr10:102495413:AAAAAATTAGCCGGGTGTGGTGGCACGTGCCTATAGTCCCAGTACTCGGGAGGCTGAGGCAGGAGAATCTCTTGAACCCACAAGGGGGAGGTTGCAGTGAGCCGAGATTGCGCCACTGCAATTTAGCCTGGGCGACAG	138	Long Reads (vamos)	16bp+	2	2	0
chr10:102500174:TGTAATCCCAGCACTTTGGGAGGCCAAGGCGGGTGGATCATTTGAGGTCAGGAGTTCAGGACAAGTCTGGCCAATATGGTGAAACCCCATCTCTACTAAAAATACAAAAATTAGGCCGGGCGCGGTGGCTGACGCC	136	Long Reads (vamos)	16bp+	2	2	0
chr10:102500568:AAAC	4	Long Reads (vamos)	4-6bp	11	10.8346	1.42698
chr10:102504176:GCCCCCGGCCCCACCGCGCCCCCG	24	Long Reads (vamos)	16bp+	2	2	0
chr10:102510550:GTGGCTCACGCCTATAATCCCAGCACTTTGGGAGGTCGAGGCAGGCGGATCACCTGAGGTTGGGAGTTTGAGACAAGCCTGACCAACATGGAGAAACCCTGTCTCTACTAAAAATAATAAAATTAGCCGGGCGTGGTGGCACATGCCTGTAATCCCAGCTACTAGGGAGGCTGAGGCAGGATAATTGCTTGAACCTGGGAGGAGTAGGTTGCAGTGAGCCAAGATTGTGCCATTGTACTCCAGCCTGGGCAACAAGAGTGAAACT	265	Long Reads (vamos)	16bp+	2	2	0
chr10:10251465:AAAAAAATTAAAGTAGAAA	19	Long Reads (vamos)	16bp+	2	2.02273	0.0454545
chr10:102517285:CAAAAAAACAAAACAAAG	18	Long Reads (vamos)	16bp+	2	2	0
chr10:102518492:CTAT	4	Long Reads (vamos)	4-6bp	16	16.5556	1.68159
chr10:10252251:TTTTA	5	Long Reads (vamos)	4-6bp	7	6.99174	0.458264
chr10:102524307:TCTTTTCTTTT	11	Long Reads (vamos)	7-15bp	4	3.66412	0.486318
chr10:102525092:TTTAT	5	Long Reads (vamos)	4-6bp	5	5.22472	0.1762
chr10:102535485:AAAAAAAAAAAAAG	14	Long Reads (vamos)	7-15bp	3	3.06612	0.278926
chr10:102535930:GAT	3	Long Reads (vamos)	2-3bp	18	17.4419	4.43605
chr10:102539390:TGTTGATGATGTCTAATTAC	20	Long Reads (vamos)	16bp+	2	2	0
chr10:102541702:ATTTTTTTTTTTTTTTTTTTCCTTTTGAGACAGTTTTGCTCTTGGTGCCCAAGCTGGAGTATAATGGTGTGATCTCGGCTCACCGCAACCTCCACCTCCCAGGTTCAAACAATTCTCCTGCCTCAGCTTCCCTAGCAGCTGGGATTGCAGGTGTACACCGCCATGCCCGGCTA	173	Long Reads (vamos)	16bp+	2	2	0
chr10:102547839:AGAGAGAAAGAA	12	Long Reads (vamos)	7-15bp	2	2.2093	0.190971
chr10:102548163:ATAG	4	Long Reads (vamos)	4-6bp	13	12.9618	0.467763
chr10:102554095:AAAAAC	6	Long Reads (vamos)	4-6bp	4	4.17284	0.319753
chr10:102556748:AAGG	4	Long Reads (vamos)	4-6bp	15	15.3111	3.3801
chr10:102557508:CTTGAGCCAGGGAGGTCGAGGCTGC	25	Long Reads (vamos)	16bp+	2	1.98571	0.0142857
chr10:102559949:TGGCTCGATTTCTGAG	16	Long Reads (vamos)	16bp+	2	2	0
chr10:102562525:AAC	3	Long Reads (vamos)	2-3bp	12	12.0847	1.24062
chr10:102563608:CTGCAGTGAGCCAGGATCATGCCA	24	Long Reads (vamos)	16bp+	2	2	0
chr10:102566626:TGGTGGTGGGCACCTGTATAGTCCCAGCTACTCAGGAGGCTGAGGCAGGAGAATCACTTGAACCCGGAAGGCGGAGGTTGCAGTGAGCCGAGATTGTGCCACTGCACTCCAGCCTGGGTGACAGAGCGACTCCATCTCAAAAAAAAAAAAA	151	Long Reads (vamos)	16bp+	2	2	0
chr10:102568897:ATATATATATATATATATATATATATATACACAC	34	Long Reads (vamos)	16bp+	2	1.7	0.21236
chr10:10257034:AAAACC	6	Long Reads (vamos)	4-6bp	4	4.31356	0.678618
chr10:102571504:AAAC	4	Long Reads (vamos)	4-6bp	10	9.5873	0.692317
chr10:102578250:CAAAAA	6	Long Reads (vamos)	4-6bp	6	5.87218	0.24869
chr10:102578316:CCTGTAACCCCAGCACTTTGGGAGGCTGAGGCGGGTGGATCATAAGGTCAAGAGATTGAGAACATCCTGGCCAACATGGTGAAACCCTGTCTGTACTAAAAGTACAAACATTAGCTGG	118	Long Reads (vamos)	16bp+	2	2	0
chr10:102580376:TTTCTGTCCCAGTTCCTAGTGTGGGCCTTGTCTCAAGACTCTGCTGCAAGG	51	Long Reads (vamos)	16bp+	2	2	0
chr10:10258897:AATTATTAACCATAATAG	18	Long Reads (vamos)	16bp+	2	1.98864	0.0113636
chr10:102590135:TTTTTCTTTTTT	12	Long Reads (vamos)	7-15bp	3	3.24031	0.808987
chr10:102610152:GATCACTTGAGGTCAG	16	Long Reads (vamos)	16bp+	2	2	0
chr10:102612935:GGCTCAGGAAACA	13	Long Reads (vamos)	7-15bp	2	2.01266	0.0126582
chr10:102614284:GTGGCTCACGCCTATAATCCCAGCACTTTGGGAGGCCAGGACGGGCAGATCACCTGAGGTCAGGAGTTCGAGACCAGCCTGGCCAACATGGTGAAACCCCGTCTCTACTAAAAAGACAAAAATTAGCTGGGTGTAGTGGTGGATGCCTGTGATCCCAGCTACTCGGGAGGCTAAGGCGGGAGAATTGCTTGAACCCAGGAGGCGGAGGTTGCAGTGAGCTGAAATCGCACCACTGTGCTCCAGCCTGGGTAATAGAGCGAGACACCATCTCAATTAAAAAAAAAA	285	Long Reads (vamos)	16bp+	2	2	0
chr10:102622332:CGGTGGCTCACACCTGTAATCCTAGCACTTTGGGAGGCCGAGGCGGGCGGATCATGAGGTCAGGAGATCGAGACCATCCTGGCTAACACAGTAAAACCCCGTCTCTACTAAAAATACAAAA	121	Long Reads (vamos)	16bp+	2	2	0
chr10:102622682:GTGGCTCACGCCTGTAATCCCAACACTTTGGGAGGCTGAGGCAGGAGAATGGCATGAACCCAGGAGGCGGAGCTTGCAGTGAGCCAAGATCATGCTACTGCACTCCAGCCTGGGTGACAGAGTGAGACTCCGTCTCAGAAGAAAAAAAAAAAAAAAAAATTAGCTGGGCATG	172	Long Reads (vamos)	16bp+	2	2	0
chr10:102625839:TCCTGTGTGCACTCCT	16	Long Reads (vamos)	16bp+	2	2.01205	0.0608287
chr10:102635241:TGGTCTTACTGGGGCCAGAGAAC	23	Long Reads (vamos)	16bp+	2	2	0
chr10:102636157:CCCAGGCTGGAGTGCACTGGCGCGATCTCAGTTCACTGTAACCT	44	Long Reads (vamos)	16bp+	2	2	0
chr10:102637249:ATATATTATATATAATATATATATTATATATTATATAACT	40	Long Reads (vamos)	16bp+	54	51.781	167.246
chr10:102640602:AAAAG	5	Long Reads (vamos)	4-6bp	11	10.8741	1.87208
chr10:102641103:ATATATGGTATATTATAGTATATATATGGTATAGT	35	Long Reads (vamos)	16bp+	4	4.08943	0.0821005
chr10:102641370:TATACTATACTTATATAGCACACTTATAATAAGCGTACTAT	41	Long Reads (vamos)	16bp+	2	2	0
chr10:102643548:GGGCCGGGGGAGGGGAGGGGA	21	Long Reads (vamos)	16bp+	2	2.296	0.210065
chr10:102646645:TGTGTCCTCCACCCCC	16	Long Reads (vamos)	16bp+	2	1.9875	0.0125
chr10:10266132:TGGTGTTCATGTCCC	15	Long Reads (vamos)	7-15bp	48	59.9638	6823.22
chr10:102663295:AAATA	5	Long Reads (vamos)	4-6bp	31	30.8309	75.9193
chr10:102663717:AAAAT	5	Long Reads (vamos)	4-6bp	26	27.0797	4.04469
chr10:102664183:GCCCGGCTAATTTT	14	Long Reads (vamos)	7-15bp	2	1.95833	0.040493
chr10:102666654:GGTGGCTAATGCCTGTAATCCTAGCACTTTGAGAGGCCAAGGCAGGCAGATTGCCTGAGCTCAGGAGTTCGAGACCAGCCTGGGCAACATGGTGAAACCCTGTCTCTACTAAAAATACAAAAAAATTAGCTAGGCATGGTGGCACATGCCTGTAATCCCAGCTACTCGGGATGCTGAGGCAGGAGAATTGCTTGAACCTGGGAGGCGCAGGTTGCAGTGAGCCGAGATCACACCACTGCACTCCAGCCTGGGCGACAGAGTGAGACTCCGTCTCCAAAAAAAAAAAAAAAAGTCACTGTGAGGCTGGGC	309	Long Reads (vamos)	16bp+	3	3	0
chr10:102687927:TGTGTGTGTGTGTA	14	Long Reads (vamos)	7-15bp	2	2.06383	0.0819035
chr10:102695875:TTATCTTACCTCACC	15	Long Reads (vamos)	7-15bp	2	2.17978	0.171859
chr10:102696008:GCTGGAGAGCAGTGGCGCAATCTTGGCTCACTGCAACCTGCACCTCCCTGATTCAAGCAATTCTCTGCCTCAGCCTCCCAAATAGCTGGGATTACAGGCGCCCACCACCACGCCTGGCTAATTTTTTGTATTTTTAGTAGAGATGGGGTTTCACCATCTTGGCCAGGCTGGTCTTGAACTCCTGACCTTGTGATCCACCCGCCTCAGCCTCCCAAAGTGCTGGGATTACAGGCGTGAGCCACCGCACCCGGCCAACAGTTTTTT	264	Long Reads (vamos)	16bp+	2	2	0
chr10:102700533:GGCTCACCGCAACCTCCACCTCCCGGATTCAAGCGATTATCCTGCCTCAGCCTCCCGAGTAGCTGGGATTACAGGCATGCGCCACCATGCCTGGCTAATTTTGTATTTTTAGTAGAGATGGGGTTTCTCCATGTTGGTCAGGCTGGTCTTGAACTCCCGACCTCAGGTGATCCGCCCGCCTCAGCCTCCCAAAGTGCTGGGATTACAGGTGTGAGCCACTG	221	Long Reads (vamos)	16bp+	2	2	0
chr10:102703118:TTTTTTTTTTTTTTTTTTGAGACGGAGTCTCACTCTGTCGCCAGGCTGGAGTGCAATGGCACAATCTCAGCTCACTGTAATCTCCGCCTCCCAAGTTCAAGCCATTCTCCTGCCTCAGTCTCCTGAGTAGCTGGGATAACAGGTGCACACCACCACATCCAGCTAATTTTTGTATTTTTAGTAGAGACAGGATTTCACCATGTTGTCCAGGATGGTCTCCATATCCTGACCTCATGATCCACCCACCTCGGCCTCCCAAAGTGCTGGGATTACAGGCATGAGCCATGGTGCCCAGGACTTGTC	303	Long Reads (vamos)	16bp+	2	2	0
chr10:102704641:AAAATAAAAATAAAAAGAA	19	Long Reads (vamos)	16bp+	2	2	0
chr10:102706628:CAAAA	5	Long Reads (vamos)	4-6bp	5	4.87952	0.156039
chr10:102707297:AAAAAG	6	Long Reads (vamos)	4-6bp	7	7.125	2.33241
chr10:102711336:TATA	4	Long Reads (vamos)	4-6bp	14	12.6641	4.08311
chr10:102730682:GCTCACGCCTGTAATCCCAGCACTTTGGGAGGCTGAGGTGGGCGGATCACGAGGTCAGGAGATCGAGACCATCCTGGCTAACACGGTGAAACCCCGTCTCTACTAAAAAATACAAAAAATTAGCCAGGTATGGTG	135	Long Reads (vamos)	16bp+	4	3.98718	0.0128205
chr10:102736256:TTTTTTTTTTTCTTTTTTTTGAGATGGAGTTTCACTCTTGTTGTCTAGGCTGGAGTGCAGTGGCACGATCTCGGCTCACCACAGCCTCCGCCTCCCAGTTCAAGTGATTCTCCTGCCTCAGCCTCCAGAGTAGCTGGGATTACAGGTGCCTGCCACCATGCCCAGCTCA	169	Long Reads (vamos)	16bp+	4	3.61607	0.238658
chr10:102737154:AATA	4	Long Reads (vamos)	4-6bp	8	8.08333	0.28271
chr10:102746829:ACAATCTTTTTTTTACATAC	20	Long Reads (vamos)	16bp+	2	1.95294	0.0453782
chr10:102749216:AATTTTGAAACATATTT	17	Long Reads (vamos)	16bp+	2	2	0
chr10:102749766:TATT	4	Long Reads (vamos)	4-6bp	6	6.05682	0.307079
chr10:102754877:TTTA	4	Long Reads (vamos)	4-6bp	8	7.30894	1.11689
chr10:102760352:TTTC	4	Long Reads (vamos)	4-6bp	7	7.41481	4.39381
chr10:102761121:TTTT	4	Long Reads (vamos)	4-6bp	6	5.98551	1.76621
chr10:102768364:TTTTTTTTTTTTTTTGAGACGGAGTCTCGCTCTGTCGCCCAGGCTGGACTGCGGACTGCAGTGGCGCAATCTCGGCTCACTGCAAGCTCCGCTTCCCGGGTTCAACGCCATTCTCCTGCCTCAGCCTCCCCAGTAGCTGTGACTACAGGCGCCCGCCACCGCGCCCGGCTAATTTTTTTTTGTATTTTTAGTAGAGACGGGGTTTCACCTTGTTAGCCAGGATGGTCTCGATCTCCTGACCTCATGATCCACCCGCCTCGGCCTCCCAAAGTGCTGGGATTACAGGCGTGAGCCACCGCGCCCGGCCAG	309	Long Reads (vamos)	16bp+	1	1.32653	0.222175
chr10:102769337:TTCTTTGTTTTCTTTT	16	Long Reads (vamos)	16bp+	2	1.97414	0.164543
chr10:102771962:TTTTTTTTTTTTTTTTTGAGACAGAGTCTCGTTCTGTCGCTCAGGCTGGAGTGCAGTGGTGTGATCTTGGCTCACTGCAACCTCTCCCTCCTGGGCTCAAGTGTCCCTCCCACCTCAGCTTCCCGAGTAGCTGAGACAACAGGCATGTGCCACCATGCCCAGCTAATTTTTGTATTTTCTGTAGAGATGGGGTTTTGCCATGTTGCCCAAGCTGGTTTTGAACTCCTGGGCTCAAGCAATCTGCCCACCTCAGCCTCCCAAAGTACTAGGATTACAGGCGTGAGCCATG	289	Long Reads (vamos)	16bp+	3	3	0
chr10:102788427:GTAAAAATATAG	12	Long Reads (vamos)	7-15bp	2	1.98571	0.0142857
chr10:102792576:CTTTTTTTTTTCTTTT	16	Long Reads (vamos)	16bp+	2	2.13333	0.274157
chr10:102801819:TTTTTTATTCTCTCTCT	17	Long Reads (vamos)	16bp+	2	1.96396	0.0532351
chr10:102802083:TCCT	4	Long Reads (vamos)	4-6bp	11	10.7803	2.43228
chr10:102803363:GTTTGTAGTGAACTCTTGGG	20	Long Reads (vamos)	16bp+	2	1.98649	0.0135135
chr10:102804960:AAAAC	5	Long Reads (vamos)	4-6bp	6	6	0.322581
chr10:10280631:TATATATGTGTGTGCA	16	Long Reads (vamos)	16bp+	2	2.12245	0.108563
chr10:102810350:CCTC	4	Long Reads (vamos)	4-6bp	15	14.8955	2.69577
chr10:102810458:TTCC	4	Long Reads (vamos)	4-6bp	15	14.8931	3.57311
chr10:102810859:CCCCTCCCCTCCCCTTCCTCTTTCTTTTCCTTTC	34	Long Reads (vamos)	16bp+	3	2.9186	0.0991792
chr10:102811485:CTTTACAATTGTTT	14	Long Reads (vamos)	7-15bp	2	1.98795	0.0120482
chr10:102817312:ATAGAGTCTAACTATGTTGCCCAGGCTGGGCTCAAGTGATC	41	Long Reads (vamos)	16bp+	2	2	0
chr10:1028175:GGTGCGGTGGCTTATGCCTGTAGTCCCAGCACTTTGGGAGGCCAAGGCAGGTGGATCACGAGGTGAGGAGATCGAGACCATCCTGGCTAACACGGTGAAACCCCGTCTCTACTAAAAATACAAAAAAATTAGCCG	135	Long Reads (vamos)	16bp+	2	2.01429	0.0142857
chr10:102820178:TTTTA	5	Long Reads (vamos)	4-6bp	17	16.5448	2.85136
chr10:102833623:TTTTGTATTTTTAGTACAGACGGGGTTTCACCATATTGGCCAGGCTCATCTCGAACTCCTGACCTCAATTGATCTGCCCACCTCGGCCTCCCAAAGTGTTGGGATTACAGGCGTGAGCCA	120	Long Reads (vamos)	16bp+	2	2	0
chr10:102838409:AAGGCAAAGGGCAAAAGCAGAACCACTGATAAGGGTCCAACAAAGATCAC	50	Long Reads (vamos)	16bp+	3	2.98667	0.0133333
chr10:102847899:TTTTG	5	Long Reads (vamos)	4-6bp	6	5.69291	0.309711
chr10:102850174:AGAGAGAGGCTCCAGCA	17	Long Reads (vamos)	16bp+	2	1.98718	0.0128205
chr10:102853327:AAAAT	5	Long Reads (vamos)	4-6bp	7	7.152	0.662194
chr10:102853625:TATATATATG	10	Long Reads (vamos)	7-15bp	11	10.7	0.335659
chr10:102861716:AAAAAAAAAAACA	13	Long Reads (vamos)	7-15bp	3	2.96694	0.0822314
chr10:102863338:AAAAAAAAAAG	11	Long Reads (vamos)	7-15bp	2	2.10084	0.159237
chr10:102869497:CCTGAGTCGCAGGCCGAGGAGACAGTGAGTGCGCGC	36	Long Reads (vamos)	16bp+	2	2.49485	0.252577
chr10:102871727:AAACA	5	Long Reads (vamos)	4-6bp	8	8.05	2.51849
chr10:102880509:TTTCAACATTAGAA	14	Long Reads (vamos)	7-15bp	2	2	0
chr10:102883946:TTTTCTTTCTTTATTTC	17	Long Reads (vamos)	16bp+	3	3.08475	0.300449
chr10:102885319:CCCGCCTCGGCCTCCCAAAGTGCTGGGATTACAGGCGTGAGCCACCGCGCCCGGCCCACTAATTTTTGTATTTTTAGTAGAGATGGGGTTTCACATGTTGGCAAGGCTGGTCTCGAACTCCTGACCTCAGGTGATCCG	138	Long Reads (vamos)	16bp+	2	2.92982	0.986182
chr10:102886261:TTCC	4	Long Reads (vamos)	4-6bp	16	15.9545	1.5857
chr10:102886894:TTGAAATCTTTCAACTTTTTTGATATAGGCATTAC	35	Long Reads (vamos)	16bp+	2	1.98701	0.012987
chr10:102889614:CCTT	4	Long Reads (vamos)	4-6bp	15	14.9855	8.67132
chr10:102892985:AAAT	4	Long Reads (vamos)	4-6bp	11	10.9364	1.47298
chr10:102893341:GGAGTCTTGCTCTGTTGCCCAGGCTGGAGTGCAGTGGTGCGACCTCGGCTCACTGCAACCTCTGCCTCCCAAGTTCAAGCGATTCTTCTGCCTCAGCCTCCAGAGTAGATGGGACTACAGGTGCGTGCCACCATGCCTGGCTAATTTTTATTTTATTTTTTT	162	Long Reads (vamos)	16bp+	2	1.9901	0.00990099
chr10:102894422:AAAAAAAT	8	Long Reads (vamos)	7-15bp	5	4.66912	0.282298
chr10:102903800:TGAGCCTGGGAAGTGGAGGTTGCAG	25	Long Reads (vamos)	16bp+	2	2	0
chr10:102904084:ATTTTATATTTTTTT	15	Long Reads (vamos)	7-15bp	2	1.9901	0.00990099
chr10:102904395:TAAAAAAAAAAAA	13	Long Reads (vamos)	7-15bp	2	1.97222	0.214174
chr10:102910328:CAATCTCCGCTCACTG	16	Long Reads (vamos)	16bp+	3	2.83696	0.13796
chr10:102910964:CTATATATATATAAAGG	17	Long Reads (vamos)	16bp+	16	15.6692	0.662452
chr10:10291428:ACAGAGCACTGATTGGTGCATTTTTACAGAGTGCTGATTGGTGCATTTACAATCCTTTAGCTAGGC	66	Long Reads (vamos)	16bp+	5	4.92308	0.0716953
chr10:102916045:ATATATATATATAAA	15	Long Reads (vamos)	7-15bp	4	4.35897	0.301061
chr10:102916735:TCATACCAGAAATTA	15	Long Reads (vamos)	7-15bp	2	1.98718	0.0128205
chr10:102935980:TGGTGTTTTTTTT	13	Long Reads (vamos)	7-15bp	3	2.93333	0.214006
chr10:10294185:GTGTCTGTGTGTAAGTGT	18	Long Reads (vamos)	16bp+	2	2.21782	0.192079
chr10:102943223:CAAAAAAACAAACAAAAA	18	Long Reads (vamos)	16bp+	2	2.09677	0.0881196
chr10:10294365:TGTCTGTGTGTG	12	Long Reads (vamos)	7-15bp	10	10.1037	0.332449
chr10:102947481:AGTGGCTCATGCCTGTAATCCTAGCACTTTGGGAGGCCAAGGCGGGCAAATCACGAGGTCAGGAGATCGAGACCATCTGGCTAACACGGTGAAACCCTGTCTTTACTAAAAATACAAAAAAAAAATTAGCCGGGCGTGGTGGCAGGCACCTGTAGTCCCAGCTACTCAGGAGGCTGGGGCAGGAGAATGGCGTGAACCTGGGAGGTGGAGCTTGCAGTGAGCCGAGATTGCACCACTACACTCCA	245	Long Reads (vamos)	16bp+	2	2	0
chr10:102949791:AATAATAATAATAAC	15	Long Reads (vamos)	7-15bp	2	1.95775	0.0410463
chr10:102950997:TTTTTTTTGAGATGGAGTCTCATTCTGTCACCCAGGCTTGAGTGCAGTGGTGTGATCTCAGCTCACTGCAACCTCTGCCTCTTGGATTCAAGCAATTCTCCTGCCTCAACCTCCCAAGTAGCTGGGACTACAGGCGCCTGCCACCATAGCTGGCTAATTTTTGTATTTTTTTAGTAGAGACAGAGTTTTACTATATTGGCCAGGCTGGG	209	Long Reads (vamos)	16bp+	2	2	0
chr10:102954106:TTTTC	5	Long Reads (vamos)	4-6bp	7	7.97727	3.09108
chr10:102956855:AAATACCTAATGT	13	Long Reads (vamos)	7-15bp	2	2	0
chr10:102958216:TGAGCCACTGCACCTGGCC	19	Long Reads (vamos)	16bp+	2	1.9878	0.0121951
chr10:102958459:GTTTTTTTTTTTT	13	Long Reads (vamos)	7-15bp	2	2.1	0.434343
chr10:102960055:AAAT	4	Long Reads (vamos)	4-6bp	9	9.08264	0.293113
chr10:102966182:CTGGAATAAATAAA	14	Long Reads (vamos)	7-15bp	2	1.98551	0.0144928
chr10:102968224:TTG	3	Long Reads (vamos)	2-3bp	14	14.2126	1.32746
chr10:102971249:AAAAAAAAAAAAG	13	Long Reads (vamos)	7-15bp	2	1.91071	0.208172
chr10:102980111:CGCCATGTTGGCAGGCTGGTCTCAGA	26	Long Reads (vamos)	16bp+	2	1.97647	0.0232493
chr10:102983329:TATATATTTATA	12	Long Reads (vamos)	7-15bp	3	3.12605	0.111095
chr10:102990248:AGCCACCGCGCCCGGTTTA	19	Long Reads (vamos)	16bp+	2	2.0137	0.0136986
chr10:102995143:TCCTCCTCCCCCTCTTCC	18	Long Reads (vamos)	16bp+	39	40.8667	173.833
chr10:102997606:TTTGTAAAATA	11	Long Reads (vamos)	7-15bp	3	2.98718	0.0128205
chr10:103000242:AAAT	4	Long Reads (vamos)	4-6bp	11	10.1172	1.4901
chr10:103024466:TTTATT	6	Long Reads (vamos)	4-6bp	4	4.31868	0.352869
chr10:103028785:TTTTCT	6	Long Reads (vamos)	4-6bp	10	9.78358	1.84003
chr10:10303586:AAATATAATATATAATA	17	Long Reads (vamos)	16bp+	3	2.97619	0.0235227
chr10:1030469:CTTTTTCTGAATGGGCTCTCAGATTCTGCTTTCCTAAGAAAGTGTGTTGAGCTGTAGTT	59	Long Reads (vamos)	16bp+	3	3	0
chr10:103054585:TGTTT	5	Long Reads (vamos)	4-6bp	11	9.64179	5.85568
chr10:103056087:AAAAAAAAAGAAAACTAAAACT	22	Long Reads (vamos)	16bp+	2	1.98649	0.0409108
chr10:103057628:TTTTTCCATCCT	12	Long Reads (vamos)	7-15bp	2	1.9726	0.0547945
chr10:103058950:GTTT	4	Long Reads (vamos)	4-6bp	10	9.62992	0.774653
chr10:103072398:CCAGGCAGGCGACCCCGCTTCTCCCCGCCA	30	Long Reads (vamos)	16bp+	5	5.0098	0.00980392
chr10:103077192:GCACCCGCCCAGGCCC	16	Long Reads (vamos)	16bp+	2	2	0
chr10:103098673:AAATGAAATACTGAGTCTTCTTGCCTATCAAGAAACAGGAA	41	Long Reads (vamos)	16bp+	2	2	0
chr10:103108842:CTTTTT	6	Long Reads (vamos)	4-6bp	5	4.86822	0.599685
chr10:103110170:ACACCTGTAATCCCAGCACTT	21	Long Reads (vamos)	16bp+	2	2	0
chr10:103111811:AAAAAC	6	Long Reads (vamos)	4-6bp	7	7.31008	0.543726
chr10:103112313:TCATTATCAAGATGACTAGAA	21	Long Reads (vamos)	16bp+	2	2	0
chr10:103114408:AAAAATAAAAATAAAAATA	19	Long Reads (vamos)	16bp+	2	2	0
chr10:103116566:TTTTTTTTCTTTT	13	Long Reads (vamos)	7-15bp	2	2.44643	0.303411
chr10:103117673:CAGAAGCAATATGTATTTAT	20	Long Reads (vamos)	16bp+	2	2	0
chr10:103124848:TATATAATTTAATAATAA	18	Long Reads (vamos)	16bp+	5	4.95833	0.0403509
chr10:103127548:AAATGATTACC	11	Long Reads (vamos)	7-15bp	2	2	0
chr10:103128044:CTCTCC	6	Long Reads (vamos)	4-6bp	12	12.1232	2.1672
chr10:103128468:GCCCGGCCAGCCACCCCGTCCGGGAGGGAGATGGGGGGGTCAGCCCCCCCACCCGGCCAGCCGCCCCGTCCGGGAGGGAGGTGGGGGGGTCAGCCCCCCGCCCGGCCAGCCGCCCCGTCCGGGAGGGAGGTGGGGGTGTCGGCCCCCCGCCCGGCCAGCCGCCCCGTCCGGGAGGGAGGTGGGGGGGGTCAGCCCCCCTGCCCGGCCAGCCGCCCCGTCCGGGAGGTGAGGGGCGCCTCT	240	Long Reads (vamos)	16bp+	6	6.37795	0.23697
chr10:103130551:AAAAAAATAAAAATTAAA	18	Long Reads (vamos)	16bp+	3	3.0087	0.219222
chr10:103143602:TTTTTTTTTTTG	12	Long Reads (vamos)	7-15bp	2	2.27103	0.576794
chr10:103149580:TTTTTCACTTTTTCTCTACAATT	23	Long Reads (vamos)	16bp+	2	2.01429	0.0142857
chr10:103152219:AAGAAAATATACCAACCTAAAAAGGCAGTCCTTT	34	Long Reads (vamos)	16bp+	2	2	0
chr10:1031579:ATAACTAATAT	11	Long Reads (vamos)	7-15bp	8	8.26271	0.263726
chr10:103173620:AAAAAATACAAGAATTTCATTCCTGGGCTGGGTGCGGTGGCTCACGCCTGTAATCCTAGCACTCTAGGATGCCGAGGCAGGTGGATCACCTGAGGTCAGGAGTTCAAGACCAGCCTGGCTAACACGGTGAAACCCTGTCTCTACTAAAAATACAAAAAT	159	Long Reads (vamos)	16bp+	2	2	0
chr10:103178897:CTCTGTATTCCTCTACGTTTT	21	Long Reads (vamos)	16bp+	6	6	1.05185
chr10:103183262:ATATATTATATATATAT	17	Long Reads (vamos)	16bp+	2	2.31304	0.497635
chr10:103185649:AAAAAAAAAAAAAAG	15	Long Reads (vamos)	7-15bp	2	2.03759	0.263728
chr10:103186640:GCGGTGGTTCACGCCTATAATCCCAGCACTCTGGGAGGCTGAGGTGGGCGGATCACCTGAGGTCAGGAGTTCAAGACCAGCCTGGCCAACAGGGCAAAACCTGTCTCTACTAAAAATACAAAAATTAGCTAGGCATGGTGGCGCATACCTGTAATCCCAGCTACTAGGGAGGCTGAGGCAGGAGAATCGCTTAAACCCAGCAGGCGGAAGTTGCAGTACGCTGAGAGCGCACCTCTACACTCCAGCTTGGGCAACACAGAGAGACTCCACCTTAAAAAAATAAAAAA	287	Long Reads (vamos)	16bp+	2	2	0
chr10:103195368:TGTAATCTCAGCACTTTGGGAGGCCAAGGCTGGCATATCATGAGGTCAGGAGTTCAAGACCAGTCTGACCAATATGGTGAAACCTTGTCTCTACTAAAAATACAAAAATTAGCCAGGTGTGGTGGCGCACACCTGTAATCTCAGCTACTCAGGAGGCTGAGGCAGGAGAATCGCCTGAACCCAGGAGGCAGAGGTTGCAGTGAGCCGAGATTGCACCACTGCATTCCAGCCTGGGTGACAGAGTGAAACTTTGTCTTTAAAAAAAAAAAAA	271	Long Reads (vamos)	16bp+	2	2	0
chr10:103196650:AACTGGAATAAGGTCTG	17	Long Reads (vamos)	16bp+	2	2	0
chr10:103201646:CAAAA	5	Long Reads (vamos)	4-6bp	10	9.71324	0.843083
chr10:103204445:AAAAAACCAAAAAAAAC	17	Long Reads (vamos)	16bp+	2	2	0.020202
chr10:103204637:AAAAAAAG	8	Long Reads (vamos)	7-15bp	4	3.92063	0.489651
chr10:10321429:GAGAACAACTATAT	14	Long Reads (vamos)	7-15bp	2	2	0
chr10:103214469:TTTTTTTTTTTTTTTTTTGAGGTGGAGTCTCACTCTGTTGCCCAGGCTGAAGTGCGGTGGCGCGATCTCGGCTCACTGCAAGCTCTGCCTCCCGGGTTCACACCATTCTCCTGCCTCAGCCTCCCGAGCAGCTGGACTACAGGCGCCAGCCACCACGCCTGGCTTTTTTTTTTTT	175	Long Reads (vamos)	16bp+	2	2	0
chr10:103217317:GGTGGCTCATGCCTATAATCCCAGCACTTTGGGAGGCCAAGGTGGGTGGATCACAAGGCCAGGAGATCGAGACCATCGTGGCTAACACGGTGAAACCCTGTCTCTACTAAAAATATAAAAAATTAGGCGGGCATGGTGATGGGCGCCTGTGGCCCCAGCTACTCGGGAGGCTGAGGCAGGAGAATGGTGTGAACCTGGGAGGCAGAGCTTGCAGTGAGCCAAGATCACGCCACTGCACTCCAGCCTGGGTGACAGAGTGAGACTCTGTCTCAAAAAACAAAAAAAGATTTATTTCAATAAAACTAATTGGGGCTGGGTGT	320	Long Reads (vamos)	16bp+	2	2	0
chr10:103220273:ATATATATTCTATATATATAGAATAT	26	Long Reads (vamos)	16bp+	12	11.6449	3.36935
chr10:103220787:AAAAAAAAAGGAAG	14	Long Reads (vamos)	7-15bp	3	2.97959	0.0614349
chr10:103221635:GGCCAGGCGTGGTGGCTCACGCCTGTAATCCCAGCACTTTGGGAGGCCAAGGCGGATGGATCATGATGTCAGGAGATCAAGACCATCCTGGCCAACATGGTGAAACCCAGTTTCTACTAAAAATACAAAAATTAGC	136	Long Reads (vamos)	16bp+	2	2	0
chr10:103231786:AGTTTTTGT	9	Long Reads (vamos)	7-15bp	5	4.66942	0.239807
chr10:103232824:TAAAT	5	Long Reads (vamos)	4-6bp	8	7.86726	0.169722
chr10:103234724:CAAAAA	6	Long Reads (vamos)	4-6bp	7	6.64394	0.414238
chr10:10323668:CACACACATA	10	Long Reads (vamos)	7-15bp	5	5.2931	10.8873
chr10:103239547:GTCTCGCTCTGTTGCCAGGCTGGAGCACAGTGGCACGATCCCGGCTTACTGCAACCTCCACCACCTGGGTTCAAGCGATTCTCCTGCCTCGGCCTCCTGAGTAGCTGGGATTACAGGCACGCCCCACCATGCCCAGCTAATTTTT	145	Long Reads (vamos)	16bp+	2	2	0
chr10:10323969:TAAATCATCACTCTTCAGAGGAGATTGGGTGCGTTCAGGGTGGTATGGCCCTGGAA	56	Long Reads (vamos)	16bp+	2	2	0
chr10:103240157:CATT	4	Long Reads (vamos)	4-6bp	10	10.101	0.193774
chr10:103242461:ATTACAGGCGTGAG	14	Long Reads (vamos)	7-15bp	2	2	0
chr10:103242931:TTTA	4	Long Reads (vamos)	4-6bp	8	8.47863	0.82066
chr10:103250873:CCACCACCA	9	Long Reads (vamos)	7-15bp	226	208.08	3494.07
chr10:103254253:TTTCTCTTTCTTTCTTTCTCTTTCTTTC	28	Long Reads (vamos)	16bp+	5	4.98246	0.0350877
chr10:103254585:CTGGTCTTGAACTCCTGGG	19	Long Reads (vamos)	16bp+	2	2	0
chr10:103255866:AAGATAAAGGTAAGCACTTGAGAAAGTCCTCCAGGGAGCCACCATACAGGTCAAAACA	58	Long Reads (vamos)	16bp+	2	2	0
chr10:103256225:GTTT	4	Long Reads (vamos)	4-6bp	10	9.73984	0.489138
chr10:103257220:TTTTTTTTGTTTGTTTTTTAAGGACAGAGTCTCACTCTGTCACCCAGGCTGGAGTGCAGTGACGCCATCTCAGCTCACTGCAACCTCTGCCTCCCGGGTTCAAGCAATTCTCCTGGCTCAGCCTCCTGAGTAGCTGGGATTACAGGTG	148	Long Reads (vamos)	16bp+	2	2	0
chr10:103264320:AAAAAAAG	8	Long Reads (vamos)	7-15bp	3	3.21053	0.402016
chr10:103265236:AAGAA	5	Long Reads (vamos)	4-6bp	8	8.10448	3.94389
chr10:103267070:TTTTC	5	Long Reads (vamos)	4-6bp	15	15.1022	2.31301
chr10:103270614:TACAAATTCTGGA	13	Long Reads (vamos)	7-15bp	2	2	0
chr10:103272754:TTA	3	Long Reads (vamos)	2-3bp	19	18.6434	6.87185
chr10:103274391:CTGTAATCCCTGCACTTTGGGAGGCCAAGGCAGGTGGATCACCTGAGGTCAAGTTCAAGACGAGCCTGGAAAACATGATGAAACCCCGTCTCTAGTAAAAATACAAAAAATTGGCCAGGCGTGGTGGCTCATGC	134	Long Reads (vamos)	16bp+	2	2	0
chr10:103284967:TTTTTTGAGACAGAGTTTTGCTCTTGTTGCCCAAGCTGGAGTGCGGTGGTACGATCTCAGCTCACTGCAACCTCTGCCTTCCAGATTCAAGCGATTCTCCTGCCTCAGCCTCCCAAGTAGGTGGGATTACAGGCGCTTGCCACTGCACACAGCTAATTTTTGTACTTTTAGTAGAGACGGGGTTTCTCCTTGTTGGTCTGGCTGGTCTCGAACTCCCGACTCCAGGTGATCCTCCTACCTCAGCCTCCCAAAGTGCTGGGATTACAGGCATGAGCCATCATGCCTGGCAGGAGAGGACATTTGAACTGAATC	312	Long Reads (vamos)	16bp+	3	3	0
chr10:103294761:TTG	3	Long Reads (vamos)	2-3bp	17	16.8203	0.731238
chr10:103295550:ACACACACATACAC	14	Long Reads (vamos)	7-15bp	2	1.98571	0.0142857
chr10:103296669:TTTTTG	6	Long Reads (vamos)	4-6bp	9	8.84328	0.283526
chr10:103298804:AAAAAAAAAAA	11	Long Reads (vamos)	7-15bp	3	2.96094	0.305549
chr10:103300763:CGGGCACGGTGG	12	Long Reads (vamos)	7-15bp	2	2.19767	0.160465
chr10:103301447:GGCCTGTAATCCCAGCTATTCAGGAGGCTGAGGCAGGAGAATCGCTTAAACCCGGGAGGTAGAGGTTGCAGTGAGCCGAGATCATACCACTGCACTCCAGCCTGGGCAACAGTGCGAGACTTGTCTCAAAAAAAAAAAAAAAAATTAGCCGTGTGTGGTGGCACA	165	Long Reads (vamos)	16bp+	2	1.99107	0.00892857
chr10:103307113:AAAAAAT	7	Long Reads (vamos)	7-15bp	4	3.9322	0.14921
chr10:103311815:TGGTGGCTCATGCCTGTAATCCCAGCACTTTGGGAGGCTGAGGTGGGCAGATCACTTGAGGCCAAGAGTTTGAGATTAGCCTCGCCAACACGGTGAAACCTCATCTGTATTAAAAATACAAAAATTAGCTGGTGTGGTGGGACACCTATAGTCCCAGCTACTTGGCAGGCTGAGGTACTAGAATCACTTGACCCCAGGAGGAGGAGGTGCAGTGAGCCGAAATCACGCCACTGCACTCCAGCCTGGTGACAGAGCAAGACTCTGTCTCCAAAAAAAAAAAAAAAAAAAAAAAGTCACGGTTGGGCA	306	Long Reads (vamos)	16bp+	2	2	0
chr10:103312959:CAAAAA	6	Long Reads (vamos)	4-6bp	6	5.9703	0.609109
chr10:103314539:TCATTTTAGACTTTAATTAAGAAAT	25	Long Reads (vamos)	16bp+	2	2	0
chr10:103318164:GGGTGCGGTGGCTCACGCCTGTAATCCCAGCACTTTGGGAGGCCGAGACGGGCAGATCACCTGAGGTCAGGAGTTCGAGACCAGCTTGGCCAACATGGCAAAACCCTGTCTCTACAAAAAATACAAAAATAAGCTGGGTGTGGTGGCAGACACCTGTAATCCCAGCTACTCAGGAGGCTGAGGCAGGAGGATCACTCAAACCTGGGAGTCAGAAGTTGTAGTGAACCGAGATCGCGCCACTGCACTCTAGCCTGGGTAACAGAGGGAGACTCCATCTCAAAAAAAAAAAAAGAAAAAAGTGC	302	Long Reads (vamos)	16bp+	2	2	0
chr10:103322344:GTGTGCAGCTAATTTT	16	Long Reads (vamos)	16bp+	2	1.98876	0.011236
chr10:103322877:AAAACAA	7	Long Reads (vamos)	7-15bp	6	5.25758	1.09345
chr10:103324758:CAAAAAAAAAAAAAAAC	17	Long Reads (vamos)	16bp+	2	2.33835	0.377079
chr10:103325142:AAATA	5	Long Reads (vamos)	4-6bp	9	8.71429	0.879121
chr10:103329542:TCTTGGCTCACTGCAAACTCTGCCTCCTGAGTTCACGCCATTCTCCTGCCTCAGCCTCCCGAGTAGCTGGGACTACAGGCGCCTGCCACCATGCCCTGCTAATTTTTTGTATTTTTAGTAGAGACGGGTGTTAGCCAGGATGGTATCGATCTCCTGACTCGTGATCCACCCGCCTCAGCCTCCCAAAGTGCTGGGATTACAGGTGTGAGCCACTGTGCCCGGCCTGTTTTTTGTTTGTTTGTTTTTTTTTTGAGATGAAGTTTTGCTTTAGCCCAGGCTGGAATGCAGTGGCGCAA	296	Long Reads (vamos)	16bp+	3	2.98876	0.011236
chr10:103337649:GGGCACGGTGGCTCACGCCTGTAATCCCAGCACTTTGGGAGGTCGAGGTGGGTGGATAACCTGAGGTCAGGAGTTCAAGACCAGCCTGACCAACAAGGAGAAACCCTGTGTCTACTAAAAATACAAAATTAGCGGCC	137	Long Reads (vamos)	16bp+	1	1.46739	0.251672
chr10:103337938:CTGTAATCCCAGTTACCCGGGAGGCTGAGACAGGAGAACTGCTTGAACCTAGGAGGCAGAGGTTGCAGTGAGTCGAGATCATGCCACTGCACTCCAGCCTTGACAACAAGAGAAAACCCTGTCTCAAACAAACAAACAAAAAAA	144	Long Reads (vamos)	16bp+	2	1.53774	0.250943
chr10:10333982:GTTTT	5	Long Reads (vamos)	4-6bp	8.5	8.59231	1.01855
chr10:103340908:ATAATTTTTTAAAAT	15	Long Reads (vamos)	7-15bp	2	2.03896	0.0379357
chr10:103346210:TAAAAATACAAAATTAGCCAGGTGTGGTGGCGTGTGCCTGTAATCTCAGCTACTTGGGAGGCTGAGGCAGGAGAATTGCTCAAACCCAGAAGGTGGAGGTTGCGGTGAGCTGAGATCACAGCATTGCACTCCAGCCTGG	139	Long Reads (vamos)	16bp+	4	3.98592	0.0140845
chr10:103350083:AAAAC	5	Long Reads (vamos)	4-6bp	6	6.09375	0.573819
chr10:103350767:TCCTCCTCCAGCTCCTCTTCT	21	Long Reads (vamos)	16bp+	3	2.66019	0.246145
chr10:103352327:CAAAA	5	Long Reads (vamos)	4-6bp	9	8.50909	0.398999
chr10:103358729:GGCCAGGCGTGGTGGCTCATGCCTGTAATCCCAGCACTTTGGGAGGCTGAGGCGGGTGGATCATTTGAGGTCAGGAATTCGAGACCAGCCTGGCCAACGTGGTGAAACCCCGTCTCTACTAAAAATGCAAAAATTAGCTGGGCGTGGTGGTAGGTGCCTGTAATCCCAGCTACTCAGGAGGCTGAGGCAGGATAATCGCATGAACCTGGGAGGCGGAGGTTGCAGTGAGCCAAGATAATGCCATTGCACTCCAGCCTGGGC	261	Long Reads (vamos)	16bp+	3	3	0
chr10:103359655:AAAT	4	Long Reads (vamos)	4-6bp	12	11.6822	0.609133
chr10:103364573:GCGGTGGCTCATTCCTGTAATCCCAGGAGTTTGGGAGGCTGAGGCGGGAAGATCACTTAAGGTCAGGAGGTTGAGACCAGCCTGGCCAACATGACAAAACCGCATCTCTACTAAAAATATAAAAATTAGTTGGGCATGGTAGTGCACACCTGTAATCCCAGCTACTCGGGAGGCTGAGGCATGAGAATCACTTGAACCTGGGAGGTGGAATTTGCAGTGAGCTGAGATTGAAAAAAAATTAATTCAGGCCGGGC	254	Long Reads (vamos)	16bp+	2	2	0
chr10:103365100:AAAAAAAAAAGAAA	14	Long Reads (vamos)	7-15bp	4	3.71538	0.623792
chr10:103365173:TTTATTTATTTA	12	Long Reads (vamos)	7-15bp	3	2.68269	0.218727
chr10:103369347:TTTTTTTCTTTTT	13	Long Reads (vamos)	7-15bp	2	2	0.0842105
chr10:103371502:TTAATTGACAGA	12	Long Reads (vamos)	7-15bp	3	3.04082	0.039554
chr10:103380732:TTTTTTGAGATGGAGTCTCACTCTGTCGCCCAGGCTGGAGTGCAGTGGCACGATTTTGGCTCACTGCAACCTCTGCCTCCTGGGTTCAAGTGATTCTCTTGCGTCAGCCTCACAAGTAGATGGGATTACAGGTGCCCACCACCCTGCTTGGCTAATTTTGGTATTTTTAGTAGAGATGGGGTTTCACCATGTTGGCCAGGCTGGTCTTGAACTCCTAACCTCAGGTGATCCACCTGTCTCAGCCTCCCAAATTGTTGGGATTACAGGCATGA	272	Long Reads (vamos)	16bp+	3	3	0
chr10:103393587:AAAAAATAAATAAA	14	Long Reads (vamos)	7-15bp	2	2	0
chr10:103402419:TTTTTATTTTTTATTTA	17	Long Reads (vamos)	16bp+	2	2	0
chr10:103404000:GTTTTTGAGACAGAGTCTCACTCTGTTGCCCAGGCTGGAGTGCAGTGGCATGATCTCAGCTCACTGAAACCTCCATCTCCTGGGTTCAAGTGATTCTCCTGCCTCAGCCTCCCCAGTAGCTGGGATTACAGGTGCCAGCCACCACACCCAGCTAATTTTTGTATTTTCGGTAGAGACAGGGCTTCACCATGTTGGCCAGGCTGGTCTCTAACTCCTGACCTCAAATGATCCACCCGCCTCGGCCTCCCAGAGTGTTGGGATTATAGGTGTGAGCCATCATGCCTGACCTATGATTTTTGTTTGTTTGTTT	310	Long Reads (vamos)	16bp+	2	2	0
chr10:103409310:CCTTTTTTTTTTAA	14	Long Reads (vamos)	7-15bp	2	1.85586	0.124488
chr10:103410585:TTTTC	5	Long Reads (vamos)	4-6bp	7	7.47059	1.9695
chr10:103411619:GCCTCCTAAAGTGCTGGGATTA	22	Long Reads (vamos)	16bp+	2	2	0
chr10:103412166:TTTTTTTTTCTTGAGACTGAGTCTTACTTTGTCACCCAGGCTGGAGTGCAGTGGCACAGTGTTGGCTCACTGCAACCTCTGCCTCCCCATTTTAAGTGATTCTTGTGCCTCAGCCTCCTGAGTAGCTGGAATTACAGGTACGTACCACCATGCCCGGCTAA	161	Long Reads (vamos)	16bp+	2	2	0
chr10:103415474:GACTGCCACGAACAG	15	Long Reads (vamos)	7-15bp	2	1.98837	0.0116279
chr10:103420847:TTTTTG	6	Long Reads (vamos)	4-6bp	8	7.87879	0.595882
chr10:103422055:TTA	3	Long Reads (vamos)	2-3bp	14	14.2927	1.78249
chr10:10342778:ACAAGACATTCAGACACACGAAAGACGGTCGAGAATTGTCTCCCAAT	47	Long Reads (vamos)	16bp+	3	3	0
chr10:103434539:GTTACCCTTACCTACACAG	19	Long Reads (vamos)	16bp+	2	2	0
chr10:103436028:TCTTTTTTTTTTTTTTTGAGATAGAGTCTCGCTCTGTTGCCCAGGCTGGAGTGCAGTGGCACAATCTTGGC	71	Long Reads (vamos)	16bp+	2	2	0
chr10:103437478:TTAT	4	Long Reads (vamos)	4-6bp	6	6.13333	0.251685
chr10:103448127:TTTCTTTGTCTTT	13	Long Reads (vamos)	7-15bp	2	2.29839	0.243575
chr10:103451512:GATCACCCCTTCT	13	Long Reads (vamos)	7-15bp	2	1.97647	0.0232493
chr10:103451618:AGG	3	Long Reads (vamos)	2-3bp	22.5	22.4697	4.99907
chr10:103459521:TGCCTGTGTCTCTGTGGGTG	20	Long Reads (vamos)	16bp+	2	2	0
chr10:103460951:AAT	3	Long Reads (vamos)	2-3bp	10	10.5574	2.43056
chr10:103474166:CCTTCATCCATTCATCTATCCTC	23	Long Reads (vamos)	16bp+	2	2	0
chr10:103474214:CATCTATCCACCCATTCAAT	20	Long Reads (vamos)	16bp+	2	2	0
chr10:103483468:GGTGGCTCACGCCTGTAATCCCAGCACTTTGGGAGGCCAAGGCGGGTGGATCACGAGGTCAGGAGATCGAGACCATCCTGGCTAACATGGTGAAACCCTGTCTCTGCTAAACAATACAAAAAATTAGCTGGGTGT	135	Long Reads (vamos)	16bp+	4	3.98571	0.0142857
chr10:10349260:ATATAATTACAT	12	Long Reads (vamos)	7-15bp	7	6.9646	0.0344501
chr10:103499384:TCCT	4	Long Reads (vamos)	4-6bp	32	32.3015	2.50844
chr10:103501618:TTA	3	Long Reads (vamos)	2-3bp	13	12.8923	5.87979
chr10:103503959:TTTA	4	Long Reads (vamos)	4-6bp	11	10.6034	1.47616
chr10:103505381:CCTGGCTAATTTTTGTATTTTTTAGTAGAAACAAGGTTTTGCCATGTTGGCCAGGCTGGTCTTGAACTCCTGACCTCAGGTGATCTGTCCACCTTGGCCTCCCAAAATGTTGGTATTACAGGCTTCAGCCATTGCTCTCAGC	142	Long Reads (vamos)	16bp+	2	2	0
chr10:103506261:GTCCAAGTATGGGT	14	Long Reads (vamos)	7-15bp	2	1.9802	0.039604
chr10:103516227:AAAAGAAAAAAATAAAAG	18	Long Reads (vamos)	16bp+	3	2.58871	0.455481
chr10:103516800:AAGAAAAACCTGGAATACTTACACTTCCTGATTTATTTCCTTTCCTTTTCCTCCCTCCCTCCCTTCCTTTCTTCCTTCCTTCCCTCCATCCTTCCT	96	Long Reads (vamos)	16bp+	2	2	0
chr10:103525330:TTT	3	Long Reads (vamos)	2-3bp	11	10.6917	5.6694
chr10:103527949:AAAAATACAAAAATTAGCTGGGCGTGGTGGCAGGTGCCTGTAATCCCAGCTACTCAAAGGCTGAGGCAGGAGAATCACCTGAACCCGGTAGGCGGATGTTGCAGTGAGCTAAGATTGCACCATTGCACTCCAGCCTGGGCAACAGAGTGAAACTCTGTCTCAAAAGAACAGAAAGAAAA	179	Long Reads (vamos)	16bp+	3	3	0
chr10:103528834:GGAACTGGGCAAGTGTTGGAACCAA	25	Long Reads (vamos)	16bp+	2	1.98551	0.0144928
chr10:103533375:TTTTTTTTTTTGAGATGGAGTTTCACTCTTGTTGCCCAGGCTGGAGTGGAATGGCGTGATCTCAGCTCACTGCAACCTCTGCCTCCTAGGTTCAAGTGATTCTCCTGCCTCAGCCTCCTGAGTAGCTGGGATTACAGGCATAAGCCACGATGCCGGACTAATTTTGTA	168	Long Reads (vamos)	16bp+	4	4	0
chr10:103554953:GATGGGGATGTGTGT	15	Long Reads (vamos)	7-15bp	2	1.96296	0.0361111
chr10:103555158:GCGTGCGCGTGTGGCCGGCTGGCCGCGGGCGGGC	34	Long Reads (vamos)	16bp+	2	1.9863	0.0136986
chr10:103555687:CTCCTTGTCCTCTTAC	16	Long Reads (vamos)	16bp+	3	3	0.0821918
chr10:103559867:ACACATACGCACACACATACAC	22	Long Reads (vamos)	16bp+	4	3.96667	0.032493
chr10:10356560:AAAAAAAAAAAC	12	Long Reads (vamos)	7-15bp	3	3.25	0.335366
chr10:103568783:TGTTTTGTTTTTTGTTTT	18	Long Reads (vamos)	16bp+	3	3.264	0.341032
chr10:103575639:ATGGTGCCCATGCCACAGCCCCAGCAGGCCCTCCTCCCTGTT	42	Long Reads (vamos)	16bp+	2	2.03371	0.0329418
chr10:1035851:CCTGGCCCA	9	Long Reads (vamos)	7-15bp	3	3.10714	0.193201
chr10:103587052:AAAGAAAGAGAAAGAGA	17	Long Reads (vamos)	16bp+	2	1.91509	0.0974843
chr10:103596628:ACACAGACACAC	12	Long Reads (vamos)	7-15bp	3	3.5	0.621849
chr10:103603086:AGGAAGAGGAGGAG	14	Long Reads (vamos)	7-15bp	2	1.98889	0.0111111
chr10:103606177:ATC	3	Long Reads (vamos)	2-3bp	14	14.6641	1.56342
chr10:103606463:TCCCTCTCCCTCTCCCCACGGTC	23	Long Reads (vamos)	16bp+	3	2.79808	0.162715
chr10:103606897:GCCTCTTCCCGGCCGCCATCCCATCTAGGAAGTGAGGAGCGTCTCTGCCCAGCCGCCCATCGTCTGAGATGTGGGGAGTGCCTCTGCCCTGCCGCCCCGTCTGGGATGTGAGGAGCGCCTCTGCCCGGCCGCGACCCCGTCTGGGAGGTGAGGAGC	156	Long Reads (vamos)	16bp+	4	4.45455	0.305254
chr10:103614446:AAAACAAAAACAAAAC	16	Long Reads (vamos)	16bp+	3	3.19277	0.157508
chr10:103616018:CGGGGTGGGG	10	Long Reads (vamos)	7-15bp	3	3.03846	0.192308
chr10:103639608:AAAAAGAAAAAAAAAAAAG	19	Long Reads (vamos)	16bp+	2	2.06818	0.354094
chr10:103641570:AATGCCTGCTCTATTAGTGCCCCA	24	Long Reads (vamos)	16bp+	2	1.98765	0.0123457
chr10:103643233:CACCCTAGGAGACAAGAGGCAGAGGG	26	Long Reads (vamos)	16bp+	2	2	0
chr10:103650162:GCAGCAGCTCAGCAGCG	17	Long Reads (vamos)	16bp+	2	1.76471	0.419336
chr10:10366556:AGCATACACTAGAATATCCACATACAGGGACGGATGCATCGTTTGACCG	49	Long Reads (vamos)	16bp+	2	2	0
chr10:103674821:ACAAA	5	Long Reads (vamos)	4-6bp	11	11.0909	0.846634
chr10:103684166:GACAGCCCTCCTCACACTTCCACCT	25	Long Reads (vamos)	16bp+	2	2	0
chr10:103685022:AAAAAC	6	Long Reads (vamos)	4-6bp	5	4.94776	0.50101
chr10:103693284:CCCGC	5	Long Reads (vamos)	4-6bp	7	6.52991	0.906425
chr10:103705012:CCTAGGTAATA	11	Long Reads (vamos)	7-15bp	2	1.98571	0.0142857
chr10:103718760:ACAC	4	Long Reads (vamos)	4-6bp	13	12.4228	3.3444
chr10:103719695:TTTCTTTTTTTTTTT	15	Long Reads (vamos)	7-15bp	2	2.48305	0.371505
chr10:103724724:CAAC	4	Long Reads (vamos)	4-6bp	12	11.9915	0.353375
chr10:103725830:AAAAT	5	Long Reads (vamos)	4-6bp	13	13.0373	0.351981
chr10:103728105:TCAGAGCC	8	Long Reads (vamos)	7-15bp	6	5.95902	0.0396288
chr10:10373161:TTTGT	5	Long Reads (vamos)	4-6bp	9	8.66165	1.13465
chr10:103739450:GGGAGAGAGGGA	12	Long Reads (vamos)	7-15bp	2	1.95833	0.040493
chr10:10374540:TTTA	4	Long Reads (vamos)	4-6bp	14	13.5591	1.28021
chr10:10376023:ATTTATGCTTTATCTGTTTATTAAATCTGTTTA	33	Long Reads (vamos)	16bp+	2	2	0
chr10:103760570:AAAAGATATATATATGTATT	20	Long Reads (vamos)	16bp+	5	4.6875	0.216779
chr10:103788744:TAATCCCAGCTACTC	15	Long Reads (vamos)	7-15bp	2	2.01429	0.0142857
chr10:103795903:AAGG	4	Long Reads (vamos)	4-6bp	12	12.6552	2.57571
chr10:103805619:GTGGCTCATGCCTGTAATCCCAGCACTTTGGGAGGCCAAGGCAAGAGGACCACTTGAGCCCGGGAGTTTGAGACTGGCCTGGACAACACAGTGAGGCTCTGTCTCTATTTTAAAAATAAAAGGGCAGGGCGCA	133	Long Reads (vamos)	16bp+	2	2	0
chr10:103809640:CTCC	4	Long Reads (vamos)	4-6bp	12	11.8309	1.08971
chr10:103810804:ACACACACACACACAG	16	Long Reads (vamos)	16bp+	6	6.26772	0.657918
chr10:10381421:AAAAT	5	Long Reads (vamos)	4-6bp	9	9.01515	0.503585
chr10:10383222:TATGAGTGTG	10	Long Reads (vamos)	7-15bp	4	3.9661	0.118499
chr10:103832364:AAAAAGAAAAAAAAA	15	Long Reads (vamos)	7-15bp	2	1.91964	0.12862
chr10:103833461:TATATCTATATATT	14	Long Reads (vamos)	7-15bp	3	3	0
chr10:103836358:ACACACAGACACATCCATACACACACAGCACATCCCCCAATACACACATTCCACCTTCAAACTC	64	Long Reads (vamos)	16bp+	5	5	0
chr10:103839557:CAGCCCCACCCCCAAGGCCACG	22	Long Reads (vamos)	16bp+	4	3.98095	0.057326
chr10:103845330:AAAAAAAAAAA	11	Long Reads (vamos)	7-15bp	4	4.22059	1.18061
chr10:103861538:TACTCAAGAAATAATAG	17	Long Reads (vamos)	16bp+	2	2	0
chr10:103863379:AAAAAAAAAAAAG	13	Long Reads (vamos)	7-15bp	4	4.01527	1.03053
chr10:1038635:AGGGAGCAGGTGGAGGGCAGTTCCCACAGGGACGCACTGCGGGTACGACCTGGACGTGTCCCC	63	Long Reads (vamos)	16bp+	8	8.38583	1.33408
chr10:103875980:TACATACACAC	11	Long Reads (vamos)	7-15bp	3	2.95918	0.0601725
chr10:103899696:AAAAAATAAAG	11	Long Reads (vamos)	7-15bp	2	2.05195	0.102529
chr10:103909365:TATATATATG	10	Long Reads (vamos)	7-15bp	29	27.6715	34.1781
chr10:10390958:CAAATGACATCTATGGATGCCCAGTTT	27	Long Reads (vamos)	16bp+	2	2	0
chr10:103918316:CCCATCCCGCCCGAAGCCCCGC	22	Long Reads (vamos)	16bp+	6	5.86957	0.149504
chr10:103923585:GTCAGGATGAAT	12	Long Reads (vamos)	7-15bp	2	2.01429	0.0142857
chr10:103927141:CTAGTGGGTCCACCAGCTG	19	Long Reads (vamos)	16bp+	2	2	0
chr10:10393297:GGTT	4	Long Reads (vamos)	4-6bp	11	10.9224	0.454798
chr10:103933257:TTTCTGAACATCACTTTCCTT	21	Long Reads (vamos)	16bp+	2	1.98649	0.0135135
chr10:103952115:ACAAAGGAAAGCTCTCTGGA	20	Long Reads (vamos)	16bp+	2	2	0
chr10:103957068:AAAAAAAAT	9	Long Reads (vamos)	7-15bp	3	2.93701	0.154731
chr10:103960921:CATACAAACACATTCACACATACC	24	Long Reads (vamos)	16bp+	2	2	0.0277778
chr10:103966409:AAAAAAAAAAAAAAAA	16	Long Reads (vamos)	16bp+	3	3.21212	0.550081
chr10:103970851:TTTTGGATTTTGGAAT	16	Long Reads (vamos)	16bp+	2	2	0
chr10:103971250:TTTTG	5	Long Reads (vamos)	4-6bp	8	7.79688	0.289124
chr10:103985376:TGTTCATGAACATTTTGAGT	20	Long Reads (vamos)	16bp+	2	2	0
chr10:103988465:TTTCACACACAAAAATTTGCAACCTCCGGCATAAATGGGTT	41	Long Reads (vamos)	16bp+	2	1.99038	0.00961538
chr10:103990569:TAAATATGAAT	11	Long Reads (vamos)	7-15bp	2	2.04225	0.0410463
chr10:103995402:CTTTTTTCTTTT	12	Long Reads (vamos)	7-15bp	4	3.79545	0.835704
chr10:104007768:AAAT	4	Long Reads (vamos)	4-6bp	8	8.21951	1.63175
chr10:104020932:TTTTGTTGTCATATTCTGAA	20	Long Reads (vamos)	16bp+	2	1.98592	0.0140845
chr10:104025844:TTTTTTTGT	9	Long Reads (vamos)	7-15bp	3	3.03053	0.122137
chr10:104035800:ATGGGAGTGTATGGGTGTGTGTGTATGGGAGTGTGAGTATGGGTGTGTGTAT	52	Long Reads (vamos)	16bp+	20	18.942	9.73384
chr10:104040518:TGGA	4	Long Reads (vamos)	4-6bp	34	34.2791	4.21839
chr10:10404535:GACATGGAGAGAGAGAGGGAAAGAGAGCGGGGCAAG	36	Long Reads (vamos)	16bp+	3	2.97701	0.0227212
chr10:104047677:CACACACACAAAGCA	15	Long Reads (vamos)	7-15bp	2	1.9596	0.0595753
chr10:104056583:AAAAAGAAAAGAAAG	15	Long Reads (vamos)	7-15bp	2	2.29688	0.24188
chr10:104071164:TGCATGGGGAG	11	Long Reads (vamos)	7-15bp	4	3.96939	0.0299811
chr10:104071935:GCATGCACACACACAC	16	Long Reads (vamos)	16bp+	2	1.87838	0.108293
chr10:104073452:ATGTTAAATTAGCTAAATGA	20	Long Reads (vamos)	16bp+	3	2.98684	0.0131579
chr10:104077699:TTTTG	5	Long Reads (vamos)	4-6bp	6	6.07627	0.361654
chr10:104079346:TGCATGCATGTGTGTATGTG	20	Long Reads (vamos)	16bp+	3	2.89655	0.140337
chr10:10409044:TGGACCAGCTCTGTGGGGCA	20	Long Reads (vamos)	16bp+	33	33.1045	0.395017
chr10:104094849:ATCAACTACTCACATAAGTAAGGATTTATT	30	Long Reads (vamos)	16bp+	2	2	0
chr10:104099424:CAAGTTACATCAAAATATAT	20	Long Reads (vamos)	16bp+	2	1.98765	0.0123457
chr10:10411009:TTTTG	5	Long Reads (vamos)	4-6bp	9	8.78788	0.366875
chr10:104116870:TCTGTAAGAAAGACATATTTTTAGTA	26	Long Reads (vamos)	16bp+	2	2	0
chr10:104136258:AAAAAAAAAGAAG	13	Long Reads (vamos)	7-15bp	3	3.45968	0.510556
chr10:104136349:TTATT	5	Long Reads (vamos)	4-6bp	7	7.14444	0.304744
chr10:104139027:TCTA	4	Long Reads (vamos)	4-6bp	9	8.98901	0.166545
chr10:104161710:GCCTTGAACTCCTAGCCTCCT	21	Long Reads (vamos)	16bp+	2	1.98684	0.0131579
chr10:104175060:AAAC	4	Long Reads (vamos)	4-6bp	8	7.99206	1.03194
chr10:104189842:AAAAC	5	Long Reads (vamos)	4-6bp	9	9.2459	0.302669
chr10:104191541:GTATCTGAGCCTACACA	17	Long Reads (vamos)	16bp+	2	2	0
chr10:10419720:TGATCACACCACTGCACTCTAGTCTGGGTGACAGAGTAAGACCC	44	Long Reads (vamos)	16bp+	2	2	0
chr10:104214124:GTATGTGTGT	10	Long Reads (vamos)	7-15bp	2	2.18605	0.176744
chr10:104215136:AAAT	4	Long Reads (vamos)	4-6bp	11	11.1026	0.61008
chr10:104216506:GGCTTCACTGG	11	Long Reads (vamos)	7-15bp	2	1.98571	0.0142857
chr10:104217308:TTTC	4	Long Reads (vamos)	4-6bp	16	15.9552	5.26114
chr10:104230464:AAAACAAACAAAA	13	Long Reads (vamos)	7-15bp	2	2.09524	0.0869963
chr10:104233114:TTTA	4	Long Reads (vamos)	4-6bp	8	7.95575	0.310525
chr10:104245666:TCTAGCTAAGGGATTGTAAATACACCAATCAGCACTCTGTA	41	Long Reads (vamos)	16bp+	2	2	0
chr10:104245802:AATCAGCACCCTGTCAAAACGGACC	25	Long Reads (vamos)	16bp+	2	2.02817	0.0277666
chr10:104245970:GCTCCTTGCAGTAAATCTTGCT	22	Long Reads (vamos)	16bp+	2	2	0
chr10:104248830:AATCAGCACTCTGTGTCTAGCTAAAGGTTTGTAAACACACCAATGAGCACTCTGTAAAAATGCACC	66	Long Reads (vamos)	16bp+	2	2.14286	0.123924
chr10:104249259:AACTCTGGACACACGATCTTTAAGAACTGTAACACTCACTGCGAGGGTCCGCAGCTTCATTCTTGAAGTCAGCGAGACCAAGAACCCACCGGAAGGAATAAATTCCAGACACA	113	Long Reads (vamos)	16bp+	2	2	0
chr10:104264802:AAAACCATCAAACAT	15	Long Reads (vamos)	7-15bp	2	2	0
chr10:104276626:GAGACCCACTGCTTTAGGT	19	Long Reads (vamos)	16bp+	2	2	0
chr10:104276877:ATCTAAATAATAATTGTATTATGTGAAC	28	Long Reads (vamos)	16bp+	2	2	0
chr10:104282225:AAAAG	5	Long Reads (vamos)	4-6bp	7	7.5037	1.80409
chr10:104283191:TAACCAGCCTCGGTGTAGGTAGCTTTCAC	29	Long Reads (vamos)	16bp+	2	2	0
chr10:104284022:TTTTTTTGTTTGCTTG	16	Long Reads (vamos)	16bp+	2	1.95506	0.0661389
chr10:1042858:TTTTAAGGATTTTAAAATTGGTTATAATGGGCTATCAGTAATTA	44	Long Reads (vamos)	16bp+	3	3	0
chr10:104296758:TTTCTTTT	8	Long Reads (vamos)	7-15bp	6	5.58462	0.461777
chr10:104313687:GGGTGCACCTGAGTGAGAAGTGTA	24	Long Reads (vamos)	16bp+	2	2	0
chr10:104330362:AAAATCCCTTCCAG	14	Long Reads (vamos)	7-15bp	2	1.97753	0.0222165
chr10:104336587:CCAACCAAGTGATC	14	Long Reads (vamos)	7-15bp	2	1.62626	0.236446
chr10:104337329:GACCAATATCTGGTACTCTACTGTTTGTGAAATGA	35	Long Reads (vamos)	16bp+	2	2.01408	0.0140845
chr10:104349261:CAAAA	5	Long Reads (vamos)	4-6bp	7	6.83333	0.408964
chr10:104357785:TATGTACACATATATACACATA	22	Long Reads (vamos)	16bp+	17	16.7537	1.1795
chr10:104366842:TTTTAT	6	Long Reads (vamos)	4-6bp	7	7.19847	0.421844
chr10:104373724:AATAGAAATGAAATAG	16	Long Reads (vamos)	16bp+	3	3	0
chr10:104381150:AAAC	4	Long Reads (vamos)	4-6bp	10	9.97938	0.270404
chr10:104391265:ACATGGACCTGTTTCTTCAT	20	Long Reads (vamos)	16bp+	2	2	0
chr10:104396369:GAGA	4	Long Reads (vamos)	4-6bp	22	21.2677	24.1659
chr10:104413706:CATCATCATCATCATCAAGATGGCATTTCTAATAATGGGCATAAGGCATGATAGCATTGG	60	Long Reads (vamos)	16bp+	2	2.2809	0.20429
chr10:10441612:AGATATTTTATATCC	15	Long Reads (vamos)	7-15bp	3	2.99065	0.00934579
chr10:104437585:ATGATAATAGAAAA	14	Long Reads (vamos)	7-15bp	2	2	0
chr10:104438326:TTTTTTG	7	Long Reads (vamos)	7-15bp	7	7.47015	1.96527
chr10:104439704:AAC	3	Long Reads (vamos)	2-3bp	9	9.51961	2.96496
chr10:104450669:TTTA	4	Long Reads (vamos)	4-6bp	15	15.3016	1.58832
chr10:104457452:AAACCATCCGTTGACTCC	18	Long Reads (vamos)	16bp+	2	2	0
chr10:104458493:ATATATATATGTGTGTGTAT	20	Long Reads (vamos)	16bp+	6	6.06349	0.155937
chr10:104467886:AGGGTAGTAGA	11	Long Reads (vamos)	7-15bp	4	4.00901	0.0271908
chr10:104473723:TTTTTTTAAATTTTATT	17	Long Reads (vamos)	16bp+	2	2	0.0238095
chr10:10449280:CATTCTTTGA	10	Long Reads (vamos)	7-15bp	2	2.06757	0.0638652
chr10:104493869:TAAATTTTTTAAAACTT	17	Long Reads (vamos)	16bp+	3	2.54717	0.250135
chr10:104497388:TTATTTAGACTTTGAT	16	Long Reads (vamos)	16bp+	2	2	0
chr10:104500174:CAAAA	5	Long Reads (vamos)	4-6bp	6	5.96774	0.0750351
chr10:104505480:AAAACAAACAAAC	13	Long Reads (vamos)	7-15bp	8	7.47656	3.59
chr10:104512239:AGTTATATTTGGAAATGA	18	Long Reads (vamos)	16bp+	2	2	0
chr10:10451447:TTTTTCTTTTT	11	Long Reads (vamos)	7-15bp	1	2.125	1.84009
chr10:104516222:GTGTGTGTGTGTTT	14	Long Reads (vamos)	7-15bp	2	1.99057	0.00943396
chr10:104521337:CTGCAACCTCTGCCTCCAGGGTTCAAACAATTCTC	35	Long Reads (vamos)	16bp+	2	2	0
chr10:104522856:AAAGCAGGAAGGGAGA	16	Long Reads (vamos)	16bp+	2	1.9875	0.0125
chr10:104525643:GCACCCAGTCTGCCAG	16	Long Reads (vamos)	16bp+	2	2	0
chr10:104528270:TTTC	4	Long Reads (vamos)	4-6bp	11	11.2889	1.34129
chr10:10452865:TCTATCTGTCTGTCTA	16	Long Reads (vamos)	16bp+	2	2	0
chr10:104533647:TCGGGGG	7	Long Reads (vamos)	7-15bp	4	3.95146	0.144679
chr10:104534377:TCTT	4	Long Reads (vamos)	4-6bp	42	41.438	22.6744
chr10:104534703:CTTT	4	Long Reads (vamos)	4-6bp	52	50.2409	56.3607
chr10:104541006:AATA	4	Long Reads (vamos)	4-6bp	11	10.7333	0.908974
chr10:10455193:TATT	4	Long Reads (vamos)	4-6bp	9	9	0.226804
chr10:104563635:TGATGAAATTCCATCTTTGAAC	22	Long Reads (vamos)	16bp+	2	2	0
chr10:104604356:TAATATGTATACAG	14	Long Reads (vamos)	7-15bp	2	1.98718	0.0128205
chr10:104614981:ATCT	4	Long Reads (vamos)	4-6bp	19	19.0221	1.45877
chr10:104619392:AAC	3	Long Reads (vamos)	2-3bp	11	10.6356	1.19086
chr10:104621127:AATGGAAAGCTTGTATAAAATGTAGCATGTAGATGTAAGAGCT	43	Long Reads (vamos)	16bp+	2	1.98571	0.0142857
chr10:10462145:AAATACCTCAAATA	14	Long Reads (vamos)	7-15bp	2	2	0
chr10:104624122:ATTACCTATAAGAAGAAATG	20	Long Reads (vamos)	16bp+	2	1.98824	0.0117647
chr10:10462604:TTTTTTTCATCTTTTTTTTTTTTT	24	Long Reads (vamos)	16bp+	2	1.90909	0.144712
chr10:104626971:AAGGAAAG	8	Long Reads (vamos)	7-15bp	4	3.91525	0.283355
chr10:104628431:TTTTG	5	Long Reads (vamos)	4-6bp	5	5.32632	0.264726
chr10:104629787:TCTT	4	Long Reads (vamos)	4-6bp	26	24.7037	6.50857
chr10:104637059:TCCATGAAGAAGGGTTCT	18	Long Reads (vamos)	16bp+	2	2.06173	0.058642
chr10:104643633:GATTCTCTGACAGCAGGG	18	Long Reads (vamos)	16bp+	2	2	0
chr10:1046461:ACTGTCTACACCACACAGCCCAGCTGCTCC	30	Long Reads (vamos)	16bp+	16	17.2574	10.0444
chr10:104658829:TTTTGT	6	Long Reads (vamos)	4-6bp	9	8.82576	0.786202
chr10:104661672:ATAG	4	Long Reads (vamos)	4-6bp	13	13.0924	0.406637
chr10:104666994:GAGAGAGAA	9	Long Reads (vamos)	7-15bp	4	3.98413	0.335746
chr10:10467058:ATACCACAATATACCAAT	18	Long Reads (vamos)	16bp+	2	2.01205	0.0364384
chr10:104686834:ATCCATCCATCCATCTATGTATCCATGCATTCATCTTTCCATTCATCTATCCATCCATCCATGT	64	Long Reads (vamos)	16bp+	5	4.85185	0.127778
chr10:104695935:ATATATGATATATATCATATACACATATA	29	Long Reads (vamos)	16bp+	32	33.3841	4.48646
chr10:104698269:GCCCTGAGACCCAA	14	Long Reads (vamos)	7-15bp	2	2.09091	0.0834879
chr10:104717289:AAAAAAAAAAGGAAAAAGAA	20	Long Reads (vamos)	16bp+	2	2.00885	0.115992
chr10:104718147:AAAT	4	Long Reads (vamos)	4-6bp	9	9.09901	0.570099
chr10:104723004:TCTTGCCTTCTGCTAGCTTTTGAATGTGATTGC	33	Long Reads (vamos)	16bp+	2	2	0
chr10:104728021:TCTA	4	Long Reads (vamos)	4-6bp	14	14.1271	1.41105
chr10:104770963:CCACTATGCCTTCTAAACTG	20	Long Reads (vamos)	16bp+	2	1.98571	0.0142857
chr10:104778862:CCTGTGGATGTTACCCTATGTGGCAAAAGGGACTT	35	Long Reads (vamos)	16bp+	2	1.95833	0.040493
chr10:104786549:AAT	3	Long Reads (vamos)	2-3bp	9	10.5926	6.69228
chr10:10479499:ATGATGGAAACGAGATAAGTATC	23	Long Reads (vamos)	16bp+	2	2	0
chr10:104807183:TGTGTGTGTGCGCA	14	Long Reads (vamos)	7-15bp	3	2.62185	0.237146
chr10:104817324:CTCCTCCCTTCCCTGCCTCCCTCCTCCCCCCTCTTCCACCCTTCTCCCCTTCCTCCCCCTCCTC	64	Long Reads (vamos)	16bp+	4	3.9899	0.152958
chr10:104817621:CTCCTCCTTCTCTCCCCTCCC	21	Long Reads (vamos)	16bp+	2	1.96341	0.035682
chr10:104818334:TCCT	4	Long Reads (vamos)	4-6bp	19	19.7786	8.72754
chr10:104824582:GGTGCTGAACGCTGTCCCGGGTGCTGGA	28	Long Reads (vamos)	16bp+	2	1.98684	0.0131579
chr10:104832718:AAAT	4	Long Reads (vamos)	4-6bp	8	8.34343	0.819625
chr10:10483876:TCTCCCTCCCTCCCTCCCCCATTTATCTCCCTCCCTCCCCCTCCTCTCTCTGTCTC	56	Long Reads (vamos)	16bp+	7	7.53435	6.80458
chr10:104840764:TTTTAGAGGCATGTGCCCTGAAGGCTTGATGTTGGGGAAAAATGA	45	Long Reads (vamos)	16bp+	3	2.76289	0.182775
chr10:104841050:TGTGTGTGTGTA	12	Long Reads (vamos)	7-15bp	2	1.98611	0.0420579
chr10:10484313:CACTCTCATCT	11	Long Reads (vamos)	7-15bp	3	3.17797	0.181733
chr10:104856294:ATATATATATAAATTAGAGGT	21	Long Reads (vamos)	16bp+	3	2.9878	0.0121951
chr10:104856500:TATATATAAATATATACATAGAAATGTATG	30	Long Reads (vamos)	16bp+	2	2.08333	0.0774648
chr10:104862618:TTGTATGTGTTTTTAAATATAATG	24	Long Reads (vamos)	16bp+	3	3	0
chr10:104865230:GAAAGAAG	8	Long Reads (vamos)	7-15bp	5	5.04854	0.144679
chr10:104876703:TTCC	4	Long Reads (vamos)	4-6bp	37	36.0373	18.5625
chr10:104886549:TCTA	4	Long Reads (vamos)	4-6bp	15	15.6587	2.2906
chr10:10490170:TGCCTAAATACCAGATTT	18	Long Reads (vamos)	16bp+	2	1.98214	0.0176963
chr10:104909419:TTGTTTGCCAATTTTAGA	18	Long Reads (vamos)	16bp+	2	2	0
chr10:10491879:TCTTTTCATAAACATGA	17	Long Reads (vamos)	16bp+	2	2	0
chr10:104923278:CCTTAGGAAGTGTAATCCTCATAGCTCTTAGTTATATGACTACATGTTGGCTGGCCAAGC	60	Long Reads (vamos)	16bp+	2	2.01429	0.0142857
chr10:104945056:TCATAGAGTATTGAGCCATAAAACG	25	Long Reads (vamos)	16bp+	2	2	0
chr10:104945231:TGTTT	5	Long Reads (vamos)	4-6bp	8	7.88	1.25161
chr10:104960576:TAATCCAT	8	Long Reads (vamos)	7-15bp	5	4.98851	0.0347501
chr10:104987166:AAGGAAGGAATGAAGG	16	Long Reads (vamos)	16bp+	3	3	0
chr10:104991250:AGACTGAGTGGCTTAAACAATAGAAAT	27	Long Reads (vamos)	16bp+	2	2	0
chr10:104991425:GATCTTTCCTCTA	13	Long Reads (vamos)	7-15bp	3	3	0
chr10:104995121:CTTTT	5	Long Reads (vamos)	4-6bp	12	11.6565	1.75032
chr10:104996065:TATGTCTGGACTCTATTC	18	Long Reads (vamos)	16bp+	2	2	0
chr10:104997093:GAATAATAGGAAATGTGATCA	21	Long Reads (vamos)	16bp+	2	2	0
chr10:105000055:TGAA	4	Long Reads (vamos)	4-6bp	9	8.94382	0.349081
chr10:105005091:AATTATATGAATACCACAAGATTGCT	26	Long Reads (vamos)	16bp+	2	2	0
chr10:105009503:AAAC	4	Long Reads (vamos)	4-6bp	6	6.25234	0.530065
chr10:105014062:ACATATATATAC	12	Long Reads (vamos)	7-15bp	6	6.41322	0.427824
chr10:105022810:TTAAAACAGGACTTGAG	17	Long Reads (vamos)	16bp+	4	3.85149	0.127723
chr10:105031305:ACACACAC	8	Long Reads (vamos)	7-15bp	7	7.10769	0.934049
chr10:10503700:ATTTACATTTAATTTA	16	Long Reads (vamos)	16bp+	2	2	0
chr10:105040962:TAAATATATATATTTAGCATATA	23	Long Reads (vamos)	16bp+	2	1.9759	0.0238025
chr10:105041410:ATATAACTATATATACAT	18	Long Reads (vamos)	16bp+	6	5.69298	0.214641
chr10:105049549:TAGTTAAGGTTTAGTAT	17	Long Reads (vamos)	16bp+	2	2	0
chr10:105085879:TCTCTATCTCTGTGTGTTTCT	21	Long Reads (vamos)	16bp+	2	2	0
chr10:105086981:GCCCATGCCTATGTCCTG	18	Long Reads (vamos)	16bp+	1	1.44565	0.249761
chr10:105088449:GAAGTAATAATTTTATTTTAACCAATAAAAATCATTTTAGTTTTTCTAAAACATACCACTTGC	63	Long Reads (vamos)	16bp+	2	1.89423	0.0955004
chr10:105091071:TCCT	4	Long Reads (vamos)	4-6bp	124	106.837	712.152
chr10:105093222:ATGATTCACAACTTATACA	19	Long Reads (vamos)	16bp+	2	2	0
chr10:105108329:CAGTTGCAGCTGAGTGTATCCATTGTAAAGTTTATAGTATATTGGTGGCATTTTTAGACCACACAGAATTGC	72	Long Reads (vamos)	16bp+	2	2	0
chr10:105109757:CAAATATATTGATA	14	Long Reads (vamos)	7-15bp	3	3.01053	0.0105263
chr10:10512512:CTCCTGCCCTCAGC	14	Long Reads (vamos)	7-15bp	2	2.0495	0.0475248
chr10:105133086:CCTGCTTTTGTGAGGACTCTGCCCCTGAAGGGCTGTGCGATCTTTGGAAAATAAATT	57	Long Reads (vamos)	16bp+	2	2	0
chr10:10513815:AGCAAAACCTAGATCTCTCTCTA	23	Long Reads (vamos)	16bp+	8	7.98131	0.0185153
chr10:10514612:GGATTCAGACGT	12	Long Reads (vamos)	7-15bp	2	2	0
chr10:10517631:GAGGCAATTTTCCCTGCAGCATGGGAAGGGTAGGCA	36	Long Reads (vamos)	16bp+	2	2	0
chr10:105177249:CCTATGATAGAGGAT	15	Long Reads (vamos)	7-15bp	2	2	0
chr10:105203023:CAGCCTCACTTCTTC	15	Long Reads (vamos)	7-15bp	2	2.01235	0.0123457
chr10:105206177:TTTACAAAATATACAAAC	18	Long Reads (vamos)	16bp+	2	1.96104	0.0379357
chr10:105207272:TTA	3	Long Reads (vamos)	2-3bp	11	12.3223	9.07025
chr10:105209111:ATGTAATGCAAT	12	Long Reads (vamos)	7-15bp	2	2	0
chr10:105223:CCTGGAAGGGCGGGGCTCCTGCCTGCCTCTGCCTCCCTCCTACCACCAAGAGCACAGGGAGGCCCGGCCCACAGTCACGACTTGGGCAGCTGCAGCTGCA	100	Long Reads (vamos)	16bp+	2	2.20155	0.17781
chr10:105230048:CTGGTGGTAGTGGCAGGGTGGTGTGCCCAAC	31	Long Reads (vamos)	16bp+	2	2	0
chr10:105230368:GGGCAGGGGTGCTTTTAGTGGT	22	Long Reads (vamos)	16bp+	2	1.98667	0.0133333
chr10:105240777:CCCCTTCTCAGTCAATCTCCAGTCCAGTC	29	Long Reads (vamos)	16bp+	2	2	0
chr10:105240909:ATATACACACAC	12	Long Reads (vamos)	7-15bp	2	1.95833	0.040493
chr10:105240947:ATATCT	6	Long Reads (vamos)	4-6bp	8	7.46218	0.945592
chr10:105242233:TATATTTATA	10	Long Reads (vamos)	7-15bp	85	84.9466	37.0356
chr10:105275005:TTTTC	5	Long Reads (vamos)	4-6bp	15	14.2441	7.8209
chr10:105276978:CATATTCATGTTCTGT	16	Long Reads (vamos)	16bp+	2	2	0
chr10:105280727:CTTTATATTTGACATTGT	18	Long Reads (vamos)	16bp+	2	2	0
chr10:105281960:TTTC	4	Long Reads (vamos)	4-6bp	30	28.8571	11.8052
chr10:105283135:TTTTCTTTTTCTTTC	15	Long Reads (vamos)	7-15bp	5	4.71756	0.558074
chr10:105288805:TCAAATTATTTAATTCA	17	Long Reads (vamos)	16bp+	3	3	0
chr10:105295529:TTTATTTTTA	10	Long Reads (vamos)	7-15bp	5	5.00909	0.0274395
chr10:105297939:AAAGAAAGAAGAAAGAAAGAAAAAAAGAAAGATGAAAGAA	40	Long Reads (vamos)	16bp+	2	2.39474	0.242105
chr10:105306406:TTAT	4	Long Reads (vamos)	4-6bp	8	7.90654	0.330806
chr10:105329753:AAATATATATACATACAC	18	Long Reads (vamos)	16bp+	2	1.98611	0.0138889
chr10:105339912:TCCTTCCCTCCCTTCC	16	Long Reads (vamos)	16bp+	7	7.03077	0.355635
chr10:105343687:CATC	4	Long Reads (vamos)	4-6bp	19	18.9077	0.735599
chr10:10535720:CAAAAACAAAAACAA	15	Long Reads (vamos)	7-15bp	3	2.98958	0.0104167
chr10:105365729:TTAGACATATTTGTA	15	Long Reads (vamos)	7-15bp	4	3.98889	0.033583
chr10:105366127:GTGTGTGTATCCGTGT	16	Long Reads (vamos)	16bp+	2	2.00971	0.0489244
chr10:10537013:TGC	3	Long Reads (vamos)	2-3bp	8	7.63462	0.622479
chr10:105372377:AAAT	4	Long Reads (vamos)	4-6bp	10	9.47748	1.94267
chr10:105376312:CTATTAGAAACCGGGCATTA	20	Long Reads (vamos)	16bp+	2	2	0
chr10:105393090:TTGCCCAAACAGTTCACT	18	Long Reads (vamos)	16bp+	2	2.02439	0.0240891
chr10:105394656:TGATGTATTTAAAAATT	17	Long Reads (vamos)	16bp+	2	1.97727	0.022466
chr10:105396443:TTGCTTAAGGTAG	13	Long Reads (vamos)	7-15bp	2	1.98592	0.0426559
chr10:105400221:AAAC	4	Long Reads (vamos)	4-6bp	9	9.23894	0.772756
chr10:105400616:AAC	3	Long Reads (vamos)	2-3bp	14	14.0865	0.992438
chr10:105403259:ATATTTGATTATAT	14	Long Reads (vamos)	7-15bp	2	2	0
chr10:105404497:TTTATTTATTAAAGTTATAT	20	Long Reads (vamos)	16bp+	2	1.98701	0.012987
chr10:105406991:AATACCATTCTGGA	14	Long Reads (vamos)	7-15bp	2	1.98667	0.0133333
chr10:105407376:TTTTCTTTTTCTTT	14	Long Reads (vamos)	7-15bp	2	2.09346	0.160995
chr10:105409889:ATTATATATT	10	Long Reads (vamos)	7-15bp	3	3.07595	0.0710808
chr10:105414381:TGTATGTATATGTGTA	16	Long Reads (vamos)	16bp+	3	2.98901	0.0776557
chr10:105416688:AGG	3	Long Reads (vamos)	2-3bp	21	20.678	1.96378
chr10:105421236:AAATGTACGTCCAATGG	17	Long Reads (vamos)	16bp+	2	2	0
chr10:105421389:TAATAAGATATATGTATATATATCCTATTA	30	Long Reads (vamos)	16bp+	3	2.97436	0.0512821
chr10:105422146:ACATATCCTGAGATAAT	17	Long Reads (vamos)	16bp+	2	2.01299	0.012987
chr10:105426319:TTTCCAGCTCACTCATGGTGGGCCATCTTTTAATCCATATTTCAGCGAACTAAGCAAATAAACTATTAGAACCTT	75	Long Reads (vamos)	16bp+	2	2	0
chr10:105430094:TTTTTT	6	Long Reads (vamos)	4-6bp	10	9.62602	1.62948
chr10:105447938:TTTGTTTGTTTCTTCTAGA	19	Long Reads (vamos)	16bp+	2	1.98649	0.0135135
chr10:10545654:CTAAAATATACTATACACACACACACA	27	Long Reads (vamos)	16bp+	2	1.9863	0.0136986
chr10:105466697:CAT	3	Long Reads (vamos)	2-3bp	15	14.7563	1.20282
chr10:105469126:TATGATACTACTACTACTAATAATATGATACTCATATACCTGCTAATAAATTGTAATGATCATATTTATTAA	72	Long Reads (vamos)	16bp+	3	2.97183	0.0277666
chr10:105474787:TTA	3	Long Reads (vamos)	2-3bp	14	13.9328	3.41917
chr10:105480296:CAGCGGTGGCTGCAGAA	17	Long Reads (vamos)	16bp+	2	2.01163	0.0116279
chr10:105481021:CTGCACCCACTGTC	14	Long Reads (vamos)	7-15bp	2	1.98571	0.0142857
chr10:105482044:ATTGAGTAAAGTGAGA	16	Long Reads (vamos)	16bp+	2	2	0
chr10:105486693:ATATATATATA	11	Long Reads (vamos)	7-15bp	5	4.98198	0.0178542
chr10:105489189:AGAAAGAAGGACAGGGAAGGGAAGGGAA	28	Long Reads (vamos)	16bp+	3	2.96104	0.0379357
chr10:105513711:TCAACTCTTTCATGTGTTT	19	Long Reads (vamos)	16bp+	2	1.98571	0.0142857
chr10:105515493:ATATATACGTACCACATATATACACC	26	Long Reads (vamos)	16bp+	14	13.633	0.845566
chr10:105522598:GAAAGAGAAGGAGGGGAGAGACAGGGAAGAA	31	Long Reads (vamos)	16bp+	2	2	0
chr10:105540077:TCCT	4	Long Reads (vamos)	4-6bp	31	30.8507	7.81214
chr10:105550331:GACAGTGGGTGCA	13	Long Reads (vamos)	7-15bp	2	2	0
chr10:105556219:AATAA	5	Long Reads (vamos)	4-6bp	9	9.14035	0.33411
chr10:105557169:AAAG	4	Long Reads (vamos)	4-6bp	13	12.9549	0.997949
chr10:10555721:ACACATGCACACAC	14	Long Reads (vamos)	7-15bp	2	1.93023	0.0656635
chr10:105557411:ATCTATATCTATATTTAC	18	Long Reads (vamos)	16bp+	2	2	0
chr10:105604264:TCTCTCTA	8	Long Reads (vamos)	7-15bp	5	5.39231	0.441801
chr10:105606421:TTTTTTTGAGACAGAGTCTCGCTCTGTCACCCAGGCTGGAGTACAGTGGTATGATCTTGGCTCACTGCAACCTCCGCTTCCTAGGTTTAAGCAATTCTCCTGCTTCAGCCTCCCAAGTAGCTGGGACTACAGGCATGTGCCACCACGGTCGGCTAATTTTTGTTATTTTTAGTACAGACAGGGTTTTGCCATGTAGGCCAGGCTGGTCTCGAACTCCTGACCTCAAGTGACTCACCTGTCTTGGCCTCCCAAAATGCTGGGATTACAGGCATGAGCCATTGCGCCTGGCCCAGATTTCCATATTCTTT	308	Long Reads (vamos)	16bp+	2	2	0
chr10:105616646:ATTTTATTCTAATGTTC	17	Long Reads (vamos)	16bp+	2	2	0
chr10:105621179:TTTA	4	Long Reads (vamos)	4-6bp	9	9.19835	0.260331
chr10:10562781:AGCCTACCTCCCTGCCCTCCAC	22	Long Reads (vamos)	16bp+	2	2.25974	0.879016
chr10:105631307:TCTTTTTTTTCTT	13	Long Reads (vamos)	7-15bp	3	3.42149	0.612534
chr10:105642809:GGCACAAAATATAGGTCATAAAGACCTTGCTGATAA	36	Long Reads (vamos)	16bp+	2	1.98571	0.0142857
chr10:105642973:CAGTACCATGACAGTT	16	Long Reads (vamos)	16bp+	2	1.98571	0.0142857
chr10:105656271:TTTAGGGGAAAAAACAAA	18	Long Reads (vamos)	16bp+	2	1.99065	0.00934579
chr10:105658480:TATTT	5	Long Reads (vamos)	4-6bp	8	7.95276	0.585052
chr10:10566406:TTTTTTTTTTTA	12	Long Reads (vamos)	7-15bp	2	1.91379	0.166417
chr10:105668329:AAAGTAATCAAAAGACAAGAACATATTTGCAGAAAATCAAAA	42	Long Reads (vamos)	16bp+	3	3.38053	0.255689
chr10:105668964:AATAATATAATAAT	14	Long Reads (vamos)	7-15bp	4	4.23276	0.2497
chr10:105672048:ATATATATATATATATATATGTG	23	Long Reads (vamos)	16bp+	4	4.59223	67.8517
chr10:105672567:TTTTTTTTTTTTTTTTTTGAGACGGAGTCTCACTTTGTCACCTAGGCTAGAGTGTAGTGGCGCGATCTGGACTCACTGCAAGCTCCACCTCCTGGGTTCACACCATTCTCCTGCCTCAGCCTCCTGAGTAGCTGGGACTACAGGCGCCCACCACCACGCCCGGCTAA	167	Long Reads (vamos)	16bp+	3	3	0
chr10:1056728:GGTGTGGGGCGG	12	Long Reads (vamos)	7-15bp	2	1.93	0.0657576
chr10:105673720:AACAGAGTTTAATTCATGAATCA	23	Long Reads (vamos)	16bp+	2	2	0
chr10:105676289:TTCT	4	Long Reads (vamos)	4-6bp	13	12.8947	1.50399
chr10:105677247:ATTGTGAAGATTTCATGGACACTTATCACTTCCCCAATCAATACCCTTGTGATTTCCTATGCCTGTCTTTACTTTAATCTCT	82	Long Reads (vamos)	16bp+	2	2	0
chr10:105688661:CAAAGTTTATCATAACAACAAAAATACTACTAATATCACTACTGTTTCCAACCATGTCCCATGATCCCCTCT	72	Long Reads (vamos)	16bp+	2	1.97297	0.0266568
chr10:105692451:AAACAAAAAAAC	12	Long Reads (vamos)	7-15bp	3	2.93023	0.127907
chr10:105695183:AGATAGAGGGATAAGGGAA	19	Long Reads (vamos)	16bp+	2	2	0
chr10:105701306:TTTCTTTT	8	Long Reads (vamos)	7-15bp	4	3.95489	0.40704
chr10:105703484:AAGG	4	Long Reads (vamos)	4-6bp	45.5	43.8561	32.857
chr10:105704616:TGTTCATA	8	Long Reads (vamos)	7-15bp	5	4.96629	0.0556691
chr10:10570647:TGCCACAATATAAGA	15	Long Reads (vamos)	7-15bp	2	2	0
chr10:105708767:TGCAATTCTACTAGTGCTTGCAATTCTACTAGTGCTACATTCCAC	45	Long Reads (vamos)	16bp+	2	2	0
chr10:105713933:AGAGTCAGACTTGACAGCAATAGAAAGT	28	Long Reads (vamos)	16bp+	2	2	0
chr10:105714828:AAGACAAGGCCAGATG	16	Long Reads (vamos)	16bp+	3	2.76829	0.180217
chr10:105717181:TTACCATGGAATATGGTAATC	21	Long Reads (vamos)	16bp+	2	1.9863	0.0136986
chr10:105717564:CAAAAAAAAAAAA	13	Long Reads (vamos)	7-15bp	2	1.928	0.293161
chr10:10572330:TTTTTCTTTTTATTTTAA	18	Long Reads (vamos)	16bp+	2	1.78632	0.186708
chr10:105726329:AAAT	4	Long Reads (vamos)	4-6bp	15	14.9298	0.667598
chr10:105729628:ATCTGGCTTCAAGTGCCAGAA	21	Long Reads (vamos)	16bp+	2	2	0
chr10:105741858:AATAA	5	Long Reads (vamos)	4-6bp	10	9.93388	0.462259
chr10:105745304:GGAAGGCTTTAGCAAA	16	Long Reads (vamos)	16bp+	2	1.98913	0.0108696
chr10:10574698:TTTTTG	6	Long Reads (vamos)	4-6bp	5	5.0431	0.0589955
chr10:105747219:AAAAAAACAAAAAC	14	Long Reads (vamos)	7-15bp	2	2.03226	0.0315568
chr10:105754900:TTCTATCTCTTTCTTCC	17	Long Reads (vamos)	16bp+	2	2	0
chr10:10577364:TTA	3	Long Reads (vamos)	2-3bp	10	10.8378	4.86437
chr10:105801378:TATATATACAATATATGTATGTATTTATATATCAG	35	Long Reads (vamos)	16bp+	4	4.47706	0.251784
chr10:105802663:ATTAAATAATCCTATTATGTATATACATATAATCTTATATGTGT	44	Long Reads (vamos)	16bp+	4	3.77273	0.177638
chr10:105807590:TATATG	6	Long Reads (vamos)	4-6bp	8	8.08824	0.536692
chr10:105808011:AAAAC	5	Long Reads (vamos)	4-6bp	8	8.02609	0.446682
chr10:105815812:ATCTACAATATACACTTGAAGT	22	Long Reads (vamos)	16bp+	2	2	0
chr10:105830248:TGTATGTGTATA	12	Long Reads (vamos)	7-15bp	2	2.23469	0.181464
chr10:105841718:TCTGTCTGTT	10	Long Reads (vamos)	7-15bp	3	3.0375	0.0871835
chr10:105841802:TGTGTGTGTATATATA	16	Long Reads (vamos)	16bp+	3	2.59813	0.280374
chr10:105856244:TATATTACATATAATATATATAATA	25	Long Reads (vamos)	16bp+	12	12.8074	17.3358
chr10:105856594:TAGAACACTATATA	14	Long Reads (vamos)	7-15bp	2	2.01429	0.0142857
chr10:105860086:ATATGCTATAT	11	Long Reads (vamos)	7-15bp	17	17.1556	0.953234
chr10:105864910:AGGA	4	Long Reads (vamos)	4-6bp	8	11.2479	26.0846
chr10:105872651:AAACATACAAAAACA	15	Long Reads (vamos)	7-15bp	2	2	0
chr10:105880533:TGGTTTATACCTATATAATCTT	22	Long Reads (vamos)	16bp+	2	2	0
chr10:105882763:AAGG	4	Long Reads (vamos)	4-6bp	20	19.6183	1.53012
chr10:105911168:GAGTGAATAAATGTAAG	17	Long Reads (vamos)	16bp+	2	2	0
chr10:105912768:AATCTATAAGACATTAATGAAAGA	24	Long Reads (vamos)	16bp+	2	2	0
chr10:105915410:TTTTCTTTTTTT	12	Long Reads (vamos)	7-15bp	2	1.99074	0.121409
chr10:105923256:ACATATATATTCTCTGAAAAT	21	Long Reads (vamos)	16bp+	2	1.98649	0.0135135
chr10:105937746:AAAGTTATAGTAAAAACCATTTATATCACAAAACA	35	Long Reads (vamos)	16bp+	2	2	0
chr10:105939315:AACACAAAAAG	11	Long Reads (vamos)	7-15bp	3	2.96471	0.0344538
chr10:10594703:GTTGGGTACTAAGTCAGTGCTTTTAGGAATTCTCTCAACCCTTAATTCTCAGGACTCTGGGGTCACTAGAAGAATTCATCTCTCCCCTTAGAAGAGGTCAGAAAATCTTCCAGGCAGAAGAGATTCCAAAGGGTGGGCTG	140	Long Reads (vamos)	16bp+	2	2	0
chr10:105949487:CTAT	4	Long Reads (vamos)	4-6bp	22	21.7724	0.587098
chr10:105951822:AAAT	4	Long Reads (vamos)	4-6bp	10	10.8197	2.04986
chr10:105964613:ACACACAT	8	Long Reads (vamos)	7-15bp	6	5.48	0.445161
chr10:105967119:ACACATACAC	10	Long Reads (vamos)	7-15bp	8	8	1.48485
chr10:105979358:ATTT	4	Long Reads (vamos)	4-6bp	11	10.6228	0.697174
chr10:105984891:AGGGACTCAGCTGTGAGC	18	Long Reads (vamos)	16bp+	3	2.97531	0.0243827
chr10:10598724:TTTTT	5	Long Reads (vamos)	4-6bp	8	7.72388	4.44198
chr10:105987778:TTTA	4	Long Reads (vamos)	4-6bp	10	10.0345	0.868366
chr10:105999629:TTTTA	5	Long Reads (vamos)	4-6bp	12	11.7015	0.872629
chr10:105999848:TTTCC	5	Long Reads (vamos)	4-6bp	10	10.0149	0.977219
chr10:106006840:TTCCTCTGGGTTATAA	16	Long Reads (vamos)	16bp+	2	1.96203	0.037001
chr10:106012777:TTG	3	Long Reads (vamos)	2-3bp	11	11.1284	0.872239
chr10:106022913:AATGTCATCACTTAAGGCAAGGACTGGCCATTTTCACTTCTTTTGTGGTGG	51	Long Reads (vamos)	16bp+	2	2	0
chr10:106037630:ACGTGTGTATATGTATGTGTATATATACACACACAT	36	Long Reads (vamos)	16bp+	5	5.016	0.0803871
chr10:106052452:TGTAGTCTGCATTAGTCTGGATTC	24	Long Reads (vamos)	16bp+	2	2.01389	0.0138889
chr10:106054175:CAAACTCCTACATAATCTTAAATAACCT	28	Long Reads (vamos)	16bp+	2	2	0
chr10:106056883:TAACTTTTTATTCTTT	16	Long Reads (vamos)	16bp+	2	1.99038	0.00961538
chr10:106057033:CTTT	4	Long Reads (vamos)	4-6bp	45	44.5379	11.9909
chr10:106077538:CTTTAAAACACT	12	Long Reads (vamos)	7-15bp	2	1.98824	0.0117647
chr10:10608129:AAAC	4	Long Reads (vamos)	4-6bp	8	8.07207	0.776577
chr10:106081346:TTTATTTGATA	11	Long Reads (vamos)	7-15bp	2	1.98571	0.0142857
chr10:106093301:ATATATATATATATATAATACAA	23	Long Reads (vamos)	16bp+	2	2.19277	0.157508
chr10:106097910:CTTATAAAAATACTTGTGATTATAATTAGAGCCT	34	Long Reads (vamos)	16bp+	2	2	0
chr10:106098229:TAATTTCTGTTTCATTTTCCAAGGA	25	Long Reads (vamos)	16bp+	2	2	0
chr10:106102474:AATTTTTAGTAACTTTTAGTAATTTACTAAA	31	Long Reads (vamos)	16bp+	3	2.63366	0.234455
chr10:106108888:TTTATTAAGAGGGTATT	17	Long Reads (vamos)	16bp+	2	1.98571	0.0142857
chr10:106111394:CTTAGTCATCCCCTGGAAA	19	Long Reads (vamos)	16bp+	2	2	0
chr10:106113830:ACATCTAACTGAAATAATTGGACTTTCTAATTATATGAATAT	42	Long Reads (vamos)	16bp+	2	2	0
chr10:106117966:CTATGCAAATAAACTAGAAAATCTAGAAGAAATGG	35	Long Reads (vamos)	16bp+	2	2	0
chr10:106122768:TATTCCTAATACC	13	Long Reads (vamos)	7-15bp	2	1.97183	0.0277666
chr10:106125866:AAAAAAAAAAGAA	13	Long Reads (vamos)	7-15bp	2	2	0.192982
chr10:106128195:CTCCTGGCCTCAAGTGATCCTCCTGCCTCAGCTTCCAGAATAGCTTGAACTACAGGCACACATCACCCAGCTAATTTTCATATATTTTTTTTTTTTTGTAGAGATAGATAGGGTCTTGTTATGTTGTCCAGGCTGATCTCAAA	143	Long Reads (vamos)	16bp+	2	1.62727	0.272644
chr10:106129786:AATGAAGTACTTAATGACATCTATACATCTATATATAAATATATATA	47	Long Reads (vamos)	16bp+	6	6	0
chr10:106132552:AATATATAAAAATATATGTAA	21	Long Reads (vamos)	16bp+	2	2	0
chr10:106138783:TTT	3	Long Reads (vamos)	2-3bp	13	12.9242	8.22322
chr10:106141355:TTATAAT	7	Long Reads (vamos)	7-15bp	8	8.08421	0.120493
chr10:106141442:CATATATATAATA	13	Long Reads (vamos)	7-15bp	3	2.96907	0.0302835
chr10:106146079:TCACTCACCCA	11	Long Reads (vamos)	7-15bp	3	2.98148	0.037037
chr10:106167146:AATATTAACACT	12	Long Reads (vamos)	7-15bp	2	2	0.0285714
chr10:10616846:CATGTAGCTGGGACCACAGGCATGCACCATTACG	34	Long Reads (vamos)	16bp+	2	1.98851	0.0114943
chr10:106185857:CTTTATATAATTCTCT	16	Long Reads (vamos)	16bp+	2	2.0119	0.0119048
chr10:106187490:TTTTTTC	7	Long Reads (vamos)	7-15bp	6	5.55814	1.38917
chr10:106195168:ATAG	4	Long Reads (vamos)	4-6bp	23	23.3953	2.85029
chr10:106195279:AGAGAGAAGGAGAG	14	Long Reads (vamos)	7-15bp	6	6.30769	0.927847
chr10:106199105:TCTGGATCTCTTGACGTCATGATCC	25	Long Reads (vamos)	16bp+	1	1	0
chr10:106205379:AGACCATATTTAGATTCTAACAAAACAA	28	Long Reads (vamos)	16bp+	2	2.01316	0.0131579
chr10:106208913:TTTCTTGATATTACAACAACC	21	Long Reads (vamos)	16bp+	3	2.98734	0.0126582
chr10:106220425:AAAAACA	7	Long Reads (vamos)	7-15bp	4	3.9322	0.115022
chr10:106237428:ATATATATATATACATATATATATATATATATA	33	Long Reads (vamos)	16bp+	1	1.64706	0.765288
chr10:106240031:AAAAG	5	Long Reads (vamos)	4-6bp	12	11.812	3.41137
chr10:106241376:ACACACACAC	10	Long Reads (vamos)	7-15bp	8	7.89764	1.02912
chr10:106241954:AAATCATAGAACACAAAGTAATCAGATACTTTGTGTT	37	Long Reads (vamos)	16bp+	2	2	0
chr10:106243457:TTATTCTTAGAG	12	Long Reads (vamos)	7-15bp	3	3	0
chr10:106248737:TGTTATATAAGTTTAAAAGGGGCCATTGAGTT	32	Long Reads (vamos)	16bp+	2	2	0
chr10:106250486:TATGTACACATATATCTA	18	Long Reads (vamos)	16bp+	26.5	26.2761	3.6901
chr10:106266454:TATAAATTTTAAAATTT	17	Long Reads (vamos)	16bp+	2	2	0
chr10:106274533:ACTTCCATGTTCA	13	Long Reads (vamos)	7-15bp	3	2.96939	0.0299811
chr10:106280463:ATA	3	Long Reads (vamos)	2-3bp	15	15.4627	8.3407
chr10:106282468:AAATAAATTGTTCTACCAAAAAGACAC	27	Long Reads (vamos)	16bp+	2	2	0
chr10:106283441:AATACTTATAACTATAT	17	Long Reads (vamos)	16bp+	2	2	0
chr10:106287274:GAACTAGACTTTA	13	Long Reads (vamos)	7-15bp	2	2	0
chr10:106290814:TATT	4	Long Reads (vamos)	4-6bp	11	10.25	2.27609
chr10:106291952:AAA	3	Long Reads (vamos)	2-3bp	59	58.837	25.018
chr10:106312185:ATC	3	Long Reads (vamos)	2-3bp	14	13.7541	1.31093
chr10:106316045:AAAAAATAAAGATGAAATAAGG	22	Long Reads (vamos)	16bp+	3	2.95402	0.067629
chr10:106319890:TATC	4	Long Reads (vamos)	4-6bp	11	10.968	0.902194
chr10:106330803:AAAAAAAAGAA	11	Long Reads (vamos)	7-15bp	3	3.03279	0.147676
chr10:1063316:AATCACAGAACTTTTCGATGGTAAGTACTTTCCTCCAGCTAAATATCACAGGAAACCCTGCAGCACCACCCTCACCCTGCT	81	Long Reads (vamos)	16bp+	2	2	0
chr10:106333803:AAAACA	6	Long Reads (vamos)	4-6bp	7	7.00741	0.51487
chr10:106340189:TATATACACACACATAGACA	20	Long Reads (vamos)	16bp+	3	3.24038	0.20379
chr10:106343418:ATTAGCTACTGTGATAATAA	20	Long Reads (vamos)	16bp+	2	2	0
chr10:106364055:CACTTGTTTACCTC	14	Long Reads (vamos)	7-15bp	2	1.9878	0.0121951
chr10:106380267:TTTG	4	Long Reads (vamos)	4-6bp	8	8.0813	0.403172
chr10:106381906:TATT	4	Long Reads (vamos)	4-6bp	10	9.76852	0.740308
chr10:106386928:AAAATAAAAAATAAAT	16	Long Reads (vamos)	16bp+	2	2	0
chr10:106390344:AAATAAAAAAAAAT	14	Long Reads (vamos)	7-15bp	2	2.02105	0.0421053
chr10:106402130:AAAATAAAATTAAATTA	17	Long Reads (vamos)	16bp+	3	2.98592	0.0140845
chr10:106402640:AGCCTCAAAGG	11	Long Reads (vamos)	7-15bp	3	2.98936	0.0106383
chr10:106402769:AGTTTAAGAC	10	Long Reads (vamos)	7-15bp	4	3.98947	0.0318029
chr10:106409620:TTTTTTTTTCTTTT	14	Long Reads (vamos)	7-15bp	3	3.18254	0.678413
chr10:106413249:ATATATTTTTTCAATTAAAAATATATACCAGATTCAATTAAGTCTCACAATATTTAATTATATGAATATACAACATTAGCTATTTTGTGCATTTGAAAAGTAACCCCATTTCAAAATATTCATTTCCATTGTCCAGAACATTTATATAAATATATATATCTTTAAATACTGATGCTTTTATTTTTTTAATTAAA	194	Long Reads (vamos)	16bp+	2	2	0
chr10:106419471:AATATTTAATGATAACCTGCCTGTGA	26	Long Reads (vamos)	16bp+	4	3.98925	0.0107527
chr10:106424208:ACTTACATAAGTAAGC	16	Long Reads (vamos)	16bp+	5	4.77869	0.305988
chr10:106426982:GAATTGAAATTGATCCATCAATTGAAGTGTGAA	33	Long Reads (vamos)	16bp+	2	2.02083	0.020614
chr10:106429708:TGGAGATAGATAGAAATC	18	Long Reads (vamos)	16bp+	2	2.05556	0.0532081
chr10:106431655:AAAATATAGTAATAA	15	Long Reads (vamos)	7-15bp	3	2.90265	0.445796
chr10:106445511:GGGAG	5	Long Reads (vamos)	4-6bp	18	17.2093	2.74491
chr10:106453090:AGGTTAAGAAAATG	14	Long Reads (vamos)	7-15bp	2	1.98551	0.0144928
chr10:106453579:CTGGAAATAAGCCAAA	16	Long Reads (vamos)	16bp+	2	1.98864	0.0113636
chr10:106456351:ATATATATATATACACACAC	20	Long Reads (vamos)	16bp+	5	4.54369	0.525033
chr10:106462789:TTCTTTTTTTTTCTT	15	Long Reads (vamos)	7-15bp	2	2.10084	0.227033
chr10:106465265:GTGGCTCAGGCCTGCAATCACAGCATTTTGGGAGG	35	Long Reads (vamos)	16bp+	2	1.98592	0.0140845
chr10:106473304:AAAT	4	Long Reads (vamos)	4-6bp	12	11.7565	1.27353
chr10:106473438:GACATAAGTATCCT	14	Long Reads (vamos)	7-15bp	2	2	0
chr10:106477497:TCTCCTTCTCCTATTTTC	18	Long Reads (vamos)	16bp+	2	2.04	0.0659459
chr10:106480871:ATTT	4	Long Reads (vamos)	4-6bp	10	9.78218	0.812079
chr10:106483804:TTTA	4	Long Reads (vamos)	4-6bp	9	8.97143	0.22033
chr10:106485151:TCTTGCAAACTCAT	14	Long Reads (vamos)	7-15bp	2	2.0125	0.0125
chr10:106486988:AAACA	5	Long Reads (vamos)	4-6bp	9	8.84375	0.274606
chr10:106491890:ATTATATTTCCCCATTTTACATATATA	27	Long Reads (vamos)	16bp+	3	2.9802	0.039604
chr10:106492056:TTATATATTAAGTATATATAATATATAT	28	Long Reads (vamos)	16bp+	9.5	8.13846	4.29076
chr10:106492227:AATATAATTATAT	13	Long Reads (vamos)	7-15bp	3	3.0119	0.0119048
chr10:10649361:ACTCAGATCAGTATTAC	17	Long Reads (vamos)	16bp+	3	2.98701	0.012987
chr10:106504443:TCTTTTCCTCTTATCTTTCACTTTCACTTCA	31	Long Reads (vamos)	16bp+	2	2	0
chr10:106521849:AAAAC	5	Long Reads (vamos)	4-6bp	6	5.80315	0.286339
chr10:106527767:CCAAAGGATGTCACTGACAGCCTGGGGCCCAGGCAAAGACTTGTCACAGGGGCAGAGCCACTGC	64	Long Reads (vamos)	16bp+	2	2	0
chr10:106530616:AAGACATATTTGCACGAGTCT	21	Long Reads (vamos)	16bp+	2	1.98649	0.0135135
chr10:106538523:TTTA	4	Long Reads (vamos)	4-6bp	8	8.5	1.24336
chr10:106551164:AAGAA	5	Long Reads (vamos)	4-6bp	7	6.8626	0.734821
chr10:106551205:AGGA	4	Long Reads (vamos)	4-6bp	16	18.0752	16.0549
chr10:106551773:ACACACAC	8	Long Reads (vamos)	7-15bp	5	4.92	0.364516
chr10:106582385:GCAGGAA	7	Long Reads (vamos)	7-15bp	3	3.11392	0.127881
chr10:106591616:ATGAAGAAGCTGATATAAAGACATG	25	Long Reads (vamos)	16bp+	2	2	0
chr10:106598231:TAT	3	Long Reads (vamos)	2-3bp	17	16.784	3.18684
chr10:106612232:AAGAAAGAAGGAAG	14	Long Reads (vamos)	7-15bp	2	1.9878	0.0368865
chr10:106612961:GGCTCACTACCCTCCCCC	18	Long Reads (vamos)	16bp+	2	2.0274	0.0547945
chr10:106654894:GGCTTTACTTGGCTCACTGC	20	Long Reads (vamos)	16bp+	2	2	0
chr10:106656546:AAAAGAAAAAAG	12	Long Reads (vamos)	7-15bp	2	1.97297	0.0814513
chr10:106659867:TTAAGAAAGGTTTTC	15	Long Reads (vamos)	7-15bp	3	2.96907	0.0302835
chr10:10666861:AAAAAAAAGAAA	12	Long Reads (vamos)	7-15bp	3	2.64615	1.17615
chr10:106669242:AAC	3	Long Reads (vamos)	2-3bp	9	9.08036	1.13763
chr10:106679522:TTCCAAGTACAGATATCTAGCTTCTTAAAATAAAC	35	Long Reads (vamos)	16bp+	2	2	0
chr10:106682131:AAAC	4	Long Reads (vamos)	4-6bp	14	14.3333	1.41146
chr10:106683949:CAATGGAAGAAAGGTGAAAAACAGATTCTC	30	Long Reads (vamos)	16bp+	2	1.98718	0.0128205
chr10:106685269:GTTGAGCCCCTACCACATGG	20	Long Reads (vamos)	16bp+	2	2	0
chr10:106694189:CAAACAGCACTCTCCTCCT	19	Long Reads (vamos)	16bp+	2	1.98925	0.0107527
chr10:106704688:CAAAAA	6	Long Reads (vamos)	4-6bp	7	7.02439	0.187925
chr10:106706191:AAGAAAGAAAGAAAGAAAGAAAGAAGAAAGAAAGAGAAAAA	41	Long Reads (vamos)	16bp+	3	3.01923	0.0190441
chr10:106707715:AGGTACAGAGGGC	13	Long Reads (vamos)	7-15bp	2	2	0.0253165
chr10:106709344:AAAAAC	6	Long Reads (vamos)	4-6bp	4	3.95122	0.170431
chr10:106718693:GCTGACTGGTGTGTTTTTACAGAGTGCTGATTGGTGGATTTACAAACCTTTAGCTAGACACAGACC	66	Long Reads (vamos)	16bp+	5	4.81905	0.149634
chr10:106720551:CGATGCTACTTTTTTTTTAAG	21	Long Reads (vamos)	16bp+	2	1.9902	0.00980392
chr10:10672328:ATCTAGATTTTCTCCTATGTTATCTTCTAGGAGTTATATAGTC	43	Long Reads (vamos)	16bp+	2	2	0
chr10:106724505:AAAAAAAAACAAAAT	15	Long Reads (vamos)	7-15bp	3	3.0625	0.0591216
chr10:106725138:CAAAA	5	Long Reads (vamos)	4-6bp	6	5.91398	0.23165
chr10:106725559:AAAT	4	Long Reads (vamos)	4-6bp	9	9.07143	1.90476
chr10:106730960:CCCAGCCACTCA	12	Long Reads (vamos)	7-15bp	2	1.97674	0.0229822
chr10:106733107:AAAAG	5	Long Reads (vamos)	4-6bp	10	10.5639	3.20232
chr10:106737039:ATGTGAGTGTGC	12	Long Reads (vamos)	7-15bp	4	3.56098	0.363055
chr10:106745409:AAAAAAAAAAAGAAAAG	17	Long Reads (vamos)	16bp+	3	2.5935	0.276023
chr10:106745697:GCTTCCAACAAACAGAGTATGGGACAAGAAAAAGAGTAACTTTTCAATGGAGAAATCTGGGA	62	Long Reads (vamos)	16bp+	2	2	0
chr10:10674773:TGTGCCACTTGTGTGAG	17	Long Reads (vamos)	16bp+	4	3.98824	0.130812
chr10:106748400:TGCAAACTTAAT	12	Long Reads (vamos)	7-15bp	3	2.9863	0.0136986
chr10:106750448:GGCCGGGCGCTGTGGCTCATGCCTGTAATCCCAGCACTTTGGGAGGCCGAGGCGGGCGGATCACGAGGTCAAGAGATGGAGACCATCCTGGCTAACACGGTGAAACCCCCTCTCTACTAAAAATATAAAAAAATCAGCTGGGCGTGGTGGCGGGCGCCGTAGTCCCAGCTACTAGGGAGGCTGAGGCGGGAGAATGGCGTGAAACTGTGAGGCAGAGGTTGCAGTGAGCCGAGATAGTGCCACTGCACTCCAGCCTGGGCGACAGGGTGAGACTCCGTCTCAAAAAAAAAAAAAAAAAAAAAAAAAAAAAAAAAAAAA	318	Long Reads (vamos)	16bp+	2	2	0
chr10:106761528:ACTAGGTCATATCT	14	Long Reads (vamos)	7-15bp	2	2	0
chr10:106769546:TGTTTATAGATA	12	Long Reads (vamos)	7-15bp	2	1.98551	0.0144928
chr10:106772444:CTCTCTCTCTCTCCTCCCCT	20	Long Reads (vamos)	16bp+	3	2.91743	0.0764526
chr10:106781911:TCAAATCAAGCACACACTGATAGAAATGAG	30	Long Reads (vamos)	16bp+	2	2	0
chr10:106790151:AACAATTGGTACTGGACTTAATTCCTTCAATTTGTTACTGTAACATCAGAGGTTTGTTCTAGGTCCTGATGCTC	74	Long Reads (vamos)	16bp+	2	2	0
chr10:106795278:TTGTTTGTTTT	11	Long Reads (vamos)	7-15bp	3	2.84615	0.162194
chr10:10680131:TGTA	4	Long Reads (vamos)	4-6bp	14	13.75	0.945378
chr10:106802404:CCTCGGCCTCCCAAAGTGCTGGAATTACAGGCGTGAGCCACCGTGCCCAGCCTAATTTTTGTATTTTTAGTAGAGACAGGGTTTCACCATGTTGGCCAGGCTGGTCTCAAACTCCTGACCTCAGATGATCCTCCCG	136	Long Reads (vamos)	16bp+	3	3	0
chr10:106804338:AAAAT	5	Long Reads (vamos)	4-6bp	10	10.3158	1.13833
chr10:106805777:GCCGGGCACGGTGGCTCACACCTGTAATCCCAGCACTTTGGGAGGCCAAGGTGTGTGGATCACGAGGTCAAGAGATCGAGATCATCCTGGCCAACATGGTGAAACCCCGTCTCTACTAAAAATGCAAAAATTAGCCAGATGTGGTGGTGTGAACCTATAGTCCCAGCTACTCAGGAGGCTGAGGCAGGAGAATGGCTTGAACCCGGGAGGCAGAGGTTGCAGTGAGCCGAGATCAGGCCATTGTACTCCAGCCTGGGTGACAGAGTGAGACTCCTCCTCAAAAATAAAATAAAA	294	Long Reads (vamos)	16bp+	2	1.9802	0.019604
chr10:106807174:GAAG	4	Long Reads (vamos)	4-6bp	11	10.661	0.738809
chr10:106811989:GTTT	4	Long Reads (vamos)	4-6bp	7	6.96203	0.165206
chr10:106830562:CTTTTTTTTTTTTT	14	Long Reads (vamos)	7-15bp	2	1.82796	0.165732
chr10:106833783:TTA	3	Long Reads (vamos)	2-3bp	8	8.37398	0.777023
chr10:106865726:AAATAAAAATAAATAAATAA	20	Long Reads (vamos)	16bp+	3	3.5534	1.24957
chr10:106871373:AATCCCATTACTGG	14	Long Reads (vamos)	7-15bp	2	1.97872	0.0210478
chr10:106889963:TTACACTACTATTTCTCAA	19	Long Reads (vamos)	16bp+	2	1.98571	0.0142857
chr10:106895830:ATAGCCAACA	10	Long Reads (vamos)	7-15bp	3	3.07865	0.0960163
chr10:106916454:TACATAATTATGTATTATATATAATTATG	29	Long Reads (vamos)	16bp+	3	3.0125	0.0125
chr10:106924461:TATC	4	Long Reads (vamos)	4-6bp	13	12.7581	1.17676
chr10:106926718:ATTAATGGATTTTAGTAGC	19	Long Reads (vamos)	16bp+	2	2.0119	0.0119048
chr10:106934244:TTTATTTCTTTTTTTTA	17	Long Reads (vamos)	16bp+	2	1.98876	0.0339632
chr10:106942794:TTCTCTATCAG	11	Long Reads (vamos)	7-15bp	2	2.01429	0.0142857
chr10:106952538:TATAT	5	Long Reads (vamos)	4-6bp	16	16.0625	1.80709
chr10:106955705:GCCAGGCGCGGTGGCTCATGCCGGTAATCCCAGCATTTTGGGATGCTGAGGCCAGCCGGCAGATCACCTGAGGTCGGAAGTTCAAGATCAGCCTCACCAACATGGAGAAACCACGTCTCTACCAAATATACAAAAAAATTA	141	Long Reads (vamos)	16bp+	2	2	0
chr10:106957154:TTTTTTTTGT	10	Long Reads (vamos)	7-15bp	3	3.01515	0.656257
chr10:106962400:AAAAGAAAAGAAAAAGAAA	19	Long Reads (vamos)	16bp+	2	2.01149	0.104518
chr10:106964470:TATTT	5	Long Reads (vamos)	4-6bp	3	3.78505	0.906189
chr10:106979566:AAAAAAAAAAC	11	Long Reads (vamos)	7-15bp	3	2.97087	0.0677708
chr10:106983108:ATATACATATTTCTATATATAAATATAC	28	Long Reads (vamos)	16bp+	7	6.7619	0.294857
chr10:106989661:TTTTTTT	7	Long Reads (vamos)	7-15bp	4	4.03731	0.848221
chr10:106999180:AACATACACACAC	13	Long Reads (vamos)	7-15bp	2	1.96809	0.0312286
chr10:107014253:AAAAAAAAAAAA	12	Long Reads (vamos)	7-15bp	3	3	0.299213
chr10:107035262:AAAAAAAAAAAAC	13	Long Reads (vamos)	7-15bp	3	2.51969	0.346832
chr10:107035899:AAACAATATATAAAAATATATATTATGTTTAT	32	Long Reads (vamos)	16bp+	2	2.13084	0.114795
chr10:1070460:ACATTTAGAAGAG	13	Long Reads (vamos)	7-15bp	3	3	0.0215054
chr10:107050987:TTTTCTCTCCCTCCTTCCTTCC	22	Long Reads (vamos)	16bp+	2	1.97531	0.0243827
chr10:107062426:TAATTA	6	Long Reads (vamos)	4-6bp	6	6	0.0506329
chr10:107065398:TTTC	4	Long Reads (vamos)	4-6bp	28	28.9037	30.2966
chr10:107065649:TTTG	4	Long Reads (vamos)	4-6bp	8	7.71901	0.570386
chr10:107069353:TTTTCTTTTCTTTTCC	16	Long Reads (vamos)	16bp+	2	2.40157	0.273966
chr10:107070724:AAAATTTCAAAAAGCA	16	Long Reads (vamos)	16bp+	2	2	0
chr10:107072558:ATACATATATCTTCATATAC	20	Long Reads (vamos)	16bp+	4	3.94505	0.0525031
chr10:107073419:GGATTCTACCATCTAATTGAG	21	Long Reads (vamos)	16bp+	2	2	0
chr10:107084076:TTTTTTTT	8	Long Reads (vamos)	7-15bp	4	4.2377	0.662038
chr10:107085123:AGAAAGACAG	10	Long Reads (vamos)	7-15bp	5	5.0396	0.0584158
chr10:107087906:ATTTATTTATTT	12	Long Reads (vamos)	7-15bp	2	2.06	0.0569697
chr10:107099486:AAATTAAAATTAAATT	16	Long Reads (vamos)	16bp+	3	2.9875	0.0125
chr10:107122255:TATTTCGTCCATGTAC	16	Long Reads (vamos)	16bp+	2	2	0
chr10:107124924:CTTTCTTTTCTTT	13	Long Reads (vamos)	7-15bp	3	3.51429	0.367582
chr10:107131791:AAAATCCTCTGTGAC	15	Long Reads (vamos)	7-15bp	2	2.01064	0.0106383
chr10:107151073:TTGGAAGGCTCAGAAGAAGACAGGAAAATCTGGGGAAGTTTGGAGCTTCCTAGAGAA	57	Long Reads (vamos)	16bp+	3	2.97647	0.0232493
chr10:107153053:CTTCCCTCTCCCTC	14	Long Reads (vamos)	7-15bp	2	2.01136	0.0113636
chr10:107156196:AAATAAACCCATACAA	16	Long Reads (vamos)	16bp+	3	2.98936	0.0106383
chr10:107157131:ATGGGCTTCAGACAAACTACAAGGCTAGGGAGCAGCTGTGTTCTAACTCTTGCCTGTG	58	Long Reads (vamos)	16bp+	3	3	0
chr10:107167783:ATATGCATAT	10	Long Reads (vamos)	7-15bp	3	3.06481	0.0611803
chr10:107167827:AGAGAAAGAAGCAGA	15	Long Reads (vamos)	7-15bp	3	3	0.0714286
chr10:107176820:TAGTGTTTTATATATA	16	Long Reads (vamos)	16bp+	2	2.00877	0.00877193
chr10:107181252:TTAACTTATTTATAAATGTT	20	Long Reads (vamos)	16bp+	6	5.82857	0.181868
chr10:107189139:TTCT	4	Long Reads (vamos)	4-6bp	29	28.7761	5.13747
chr10:107218080:AAACAAAA	8	Long Reads (vamos)	7-15bp	4	4.12097	0.1885
chr10:107231260:TTTGTTTTG	9	Long Reads (vamos)	7-15bp	3	2.97521	0.17438
chr10:107233855:AAACAAAAAAAAAA	14	Long Reads (vamos)	7-15bp	3	3.18045	0.406585
chr10:107237463:TAAAAAAAAAAAAAAGG	17	Long Reads (vamos)	16bp+	2	2.09574	0.195035
chr10:107258492:AAAAAAATAAAAAAT	15	Long Reads (vamos)	7-15bp	2	1.96386	0.035263
chr10:107260398:AAC	3	Long Reads (vamos)	2-3bp	11	11.1949	3.25228
chr10:107264780:AAAAGAAAA	9	Long Reads (vamos)	7-15bp	4	4.45113	0.749487
chr10:107285590:TCCAT	5	Long Reads (vamos)	4-6bp	12	12.4397	3.20502
chr10:107294100:CTTATGATCCTATTTA	16	Long Reads (vamos)	16bp+	2	2	0
chr10:107302951:AGAA	4	Long Reads (vamos)	4-6bp	41	40.9851	14.2554
chr10:107311716:TCTA	4	Long Reads (vamos)	4-6bp	20	19.8385	3.20626
chr10:107313330:ACACACATGC	10	Long Reads (vamos)	7-15bp	8	7.71318	0.534278
chr10:107314384:AAACAATGTAAAGAAGGGATT	21	Long Reads (vamos)	16bp+	2	2	0
chr10:107317967:TTACTTCATAAAAATAAT	18	Long Reads (vamos)	16bp+	2	2	0
chr10:107328344:ATTC	4	Long Reads (vamos)	4-6bp	9	8.6875	0.829392
chr10:107328912:TTTTAAGTTTGTTTACTTA	19	Long Reads (vamos)	16bp+	2	1.98611	0.0138889
chr10:107329468:AAAAATTAAAATTTTGTGAAAAAATTAT	28	Long Reads (vamos)	16bp+	2	2	0
chr10:107332911:TTTTATTTTATTTTAT	16	Long Reads (vamos)	16bp+	2	2.30189	0.231806
chr10:107343303:AAGGACTTCAGGAAATAAGAAAAAATAGAGA	31	Long Reads (vamos)	16bp+	2	1.98824	0.0117647
chr10:107344973:TTTTTGT	7	Long Reads (vamos)	7-15bp	7	7.38971	0.77293
chr10:107347746:GTTTTTGTTTTGTTTT	16	Long Reads (vamos)	16bp+	2	2.02778	0.0272586
chr10:10735249:TTTTAAAAGCTAAATTCAGAATTTAACTTTACAGTCAAC	39	Long Reads (vamos)	16bp+	2	1.98611	0.0138889
chr10:107352580:AAAAT	5	Long Reads (vamos)	4-6bp	9	9	0.355556
chr10:107355311:CAATATTCATTCATTTGCTTTT	22	Long Reads (vamos)	16bp+	2	2	0
chr10:107360431:TATATATAAAATAAATTA	18	Long Reads (vamos)	16bp+	3	2.9878	0.0121951
chr10:1073610:ACAGACTGGGCAGCTTA	17	Long Reads (vamos)	16bp+	2	2	0
chr10:107361768:AGAT	4	Long Reads (vamos)	4-6bp	11	10.9741	0.92976
chr10:10736351:TTTC	4	Long Reads (vamos)	4-6bp	11	11.437	6.75533
chr10:107366955:AAATGCCACCATAGAT	16	Long Reads (vamos)	16bp+	2	1.98571	0.0142857
chr10:10739933:TTATTTGTTGTTTGTTTATTT	21	Long Reads (vamos)	16bp+	2	2	0
chr10:107400479:ACATTGTTGAGTG	13	Long Reads (vamos)	7-15bp	2	2.02817	0.0277666
chr10:107404937:ATCACATGTAAT	12	Long Reads (vamos)	7-15bp	2	2	0
chr10:107415668:TAGAGGAAGTTA	12	Long Reads (vamos)	7-15bp	2	1.98925	0.0107527
chr10:107420843:CAGAAGGAATAATAAACAATTTCTCCAGCAGAAAACTAACAATCAA	46	Long Reads (vamos)	16bp+	2	2	0
chr10:107428118:TTAATTGTTTA	11	Long Reads (vamos)	7-15bp	2	2	0
chr10:107429989:AAAAC	5	Long Reads (vamos)	4-6bp	8	7.81982	0.494513
chr10:107435836:GGAAGAGGGAGAGACAGA	18	Long Reads (vamos)	16bp+	2	2.14159	0.140487
chr10:107450075:AATA	4	Long Reads (vamos)	4-6bp	7	7.43802	2.06488
chr10:107450768:AAAAG	5	Long Reads (vamos)	4-6bp	9	9.15873	4.7746
chr10:10745113:AAAAAAAAAAAAC	13	Long Reads (vamos)	7-15bp	2	2.6371	0.78593
chr10:1074511:AGTGGCCCCCGTGAGGTGCTCTGCCTTCCCCCTGCCGTGGGCGGGAGAG	49	Long Reads (vamos)	16bp+	2	1.98864	0.0113636
chr10:107468842:AATTATGGTAAAAG	14	Long Reads (vamos)	7-15bp	3	3	0.021978
chr10:107476115:ATGTAAAAAATGAGAACT	18	Long Reads (vamos)	16bp+	2	2	0
chr10:107497771:AAAATGCATCCTTTATATATATATGTAC	28	Long Reads (vamos)	16bp+	2	2	0
chr10:107497847:AATATATAACATATATAT	18	Long Reads (vamos)	16bp+	7	7.02542	0.0420832
chr10:107506067:TAAAAAAAAAAAAA	14	Long Reads (vamos)	7-15bp	2	1.87603	0.142837
chr10:107518983:TGAGGTAATCTCTAGAATTTTGCAAA	26	Long Reads (vamos)	16bp+	2	1.98958	0.0104167
chr10:107520755:AAAAC	5	Long Reads (vamos)	4-6bp	5	5.08642	0.154938
chr10:107520863:GTGTGTGTTTGTGC	14	Long Reads (vamos)	7-15bp	2	1.97895	0.0208287
chr10:10752688:AAAAAAAAAG	10	Long Reads (vamos)	7-15bp	4	4.20149	0.658344
chr10:107542385:ATTATAGTATATTAT	15	Long Reads (vamos)	7-15bp	3	2.9875	0.0378165
chr10:1075647:GCTTGTGGGGAGGGAT	16	Long Reads (vamos)	16bp+	2	1.97849	0.0212716
chr10:107570557:CACACATATGCACACAC	17	Long Reads (vamos)	16bp+	2	1.94444	0.0530587
chr10:107585166:TTTTATTTTATT	12	Long Reads (vamos)	7-15bp	2	2.06849	0.0924658
chr10:10759290:TTTTTCTTTTTTT	13	Long Reads (vamos)	7-15bp	3	2.69355	0.49069
chr10:107599399:TTTTA	5	Long Reads (vamos)	4-6bp	5	5.13223	0.649036
chr10:107602874:CTTCTTCCCCTTCCTCTT	18	Long Reads (vamos)	16bp+	2	2.05952	0.0807516
chr10:107602922:CCTCTCCCTCCTCTT	15	Long Reads (vamos)	7-15bp	5	5.43902	0.428629
chr10:107609249:CATTCAAGCAGATTACAGTC	20	Long Reads (vamos)	16bp+	2	1.98611	0.0138889
chr10:107609688:ATCT	4	Long Reads (vamos)	4-6bp	22.5	22.4	3.07907
chr10:107622650:TATC	4	Long Reads (vamos)	4-6bp	16	15.5703	2.68793
chr10:107647873:GAAGGAAGAAAA	12	Long Reads (vamos)	7-15bp	3	2.96396	0.0350532
chr10:107657031:CCCAGTAGAAATAAG	15	Long Reads (vamos)	7-15bp	2	1.98571	0.0142857
chr10:10765900:CCAAGGCACAAGCACACTGGG	21	Long Reads (vamos)	16bp+	3	2.96774	0.0315568
chr10:107661877:TTGAGTTTTCTAATGTATAGTAACAGAAATCTGGCCTGGGAATT	44	Long Reads (vamos)	16bp+	2	2	0
chr10:107665972:AATGAAAAGAAAGAAAA	17	Long Reads (vamos)	16bp+	2	2	0
chr10:107666235:TTTCTCCCTCCTCCTC	16	Long Reads (vamos)	16bp+	2	1.96226	0.0366577
chr10:10767207:ACCGACACCACC	12	Long Reads (vamos)	7-15bp	3	2.89109	0.0980198
chr10:10767840:AAAAAATTAGCCAGGCGTGGTGACGGGCGCCTGTAGTCCCAGCTGCTCAGGAGGCTGAGGCAGGAGAATGGCGTGAACCCGGGAGGCGGAGCTTGCCATGAGCTGAGACCACGCCACTGCACTCCATCCTGGGCAACAGAGCAAGACTCCGTCTCAAAAAAAAAAAAAAA	170	Long Reads (vamos)	16bp+	2	1.74713	0.191125
chr10:107679513:AGTATTACC	9	Long Reads (vamos)	7-15bp	3	2.61856	0.238402
chr10:10768550:CTTTTT	6	Long Reads (vamos)	4-6bp	6	6.52672	1.5589
chr10:107688077:TATTATATTTATTA	14	Long Reads (vamos)	7-15bp	2	2	0
chr10:107693206:TTTTTTG	7	Long Reads (vamos)	7-15bp	5.5	5.5	1.01527
chr10:107697427:TTTCTTCCCTCCCTTTCTTCTTTT	24	Long Reads (vamos)	16bp+	2	2.03947	0.0384211
chr10:107710721:TGTA	4	Long Reads (vamos)	4-6bp	9	8.95652	0.84897
chr10:107724577:TTGGAGGAAAGGAAGGAGTCCT	22	Long Reads (vamos)	16bp+	2	2	0
chr10:107730568:TTTACCTTAAGAATGCTGAGATGTCTTCTGGC	32	Long Reads (vamos)	16bp+	3	3	0
chr10:107739277:AATTTTCTTCAAAAATTAA	19	Long Reads (vamos)	16bp+	2	1.59167	0.243627
chr10:107743307:AAAC	4	Long Reads (vamos)	4-6bp	7	7.26667	0.377528
chr10:10774849:TATT	4	Long Reads (vamos)	4-6bp	3	3.65041	3.21285
chr10:107752033:AATGCAAATAAAAACTACAATGAGCTATCATCTGACCCCAGTTAATATGGCTTT	54	Long Reads (vamos)	16bp+	2	2	0
chr10:107753434:CATATGAGTA	10	Long Reads (vamos)	7-15bp	3	3.07143	0.0876289
chr10:107789393:TAATTGTAAGTAATTTACATTTA	23	Long Reads (vamos)	16bp+	2	2	0
chr10:107800831:GGCCAGCCGCCCCGTCCAGGAGGGAGGTGGGGGGGTCAGCCCCCCGCCC	49	Long Reads (vamos)	16bp+	2	2.36975	0.235009
chr10:107803210:TCCACAAGTTTAGATTAAA	19	Long Reads (vamos)	16bp+	2	2	0
chr10:10780454:GTTT	4	Long Reads (vamos)	4-6bp	10	9.64078	0.840282
chr10:107806850:AAAGACAGAAATTATTAAAATCA	23	Long Reads (vamos)	16bp+	2	2	0
chr10:107808652:GTGTGTGTGTGCAT	14	Long Reads (vamos)	7-15bp	2	1.93243	0.0638652
chr10:107811230:ATGTGTGTGTGT	12	Long Reads (vamos)	7-15bp	3	2.95614	0.0600062
chr10:107818600:AACAA	5	Long Reads (vamos)	4-6bp	11	10.6866	0.607788
chr10:107819449:TTCCAATCTTTTCCTTTCTCT	21	Long Reads (vamos)	16bp+	2	1.9863	0.0136986
chr10:107839785:GGAGAAAGAGAGAGAT	16	Long Reads (vamos)	16bp+	3	2.95789	0.0407615
chr10:107843015:ATTTCTAACAGTGCT	15	Long Reads (vamos)	7-15bp	2	2	0
chr10:107844803:TTGAAGAAAAAAAGTAA	17	Long Reads (vamos)	16bp+	2	1.98148	0.0183454
chr10:107860049:AATG	4	Long Reads (vamos)	4-6bp	6	5.73958	0.341996
chr10:107866694:TAAATATAATGTAGCTATATA	21	Long Reads (vamos)	16bp+	2	1.98611	0.0138889
chr10:107866901:TATGTATTGATATATATTTATATGTAAATCTT	32	Long Reads (vamos)	16bp+	3	3.0137	0.0136986
chr10:107867060:ATTCTATATTATAATTCTATAATAT	25	Long Reads (vamos)	16bp+	3	3	0
chr10:107868806:ATAG	4	Long Reads (vamos)	4-6bp	13	13.7967	3.29442
chr10:107871975:GAGAATCAGAGGGT	14	Long Reads (vamos)	7-15bp	2	2	0
chr10:107875641:TTTTATCTACAACTACGTTAATTTTCTGTATTTGCCTTTGAAATCTTGTGTCTCTTTGATTTTATTTCA	69	Long Reads (vamos)	16bp+	2	2	0
chr10:107887629:ATGAACATTACAGAG	15	Long Reads (vamos)	7-15bp	2	1.93243	0.0638652
chr10:107903872:GTTTTTTTTTTTGTTTTTTTT	21	Long Reads (vamos)	16bp+	2	1.78814	0.732508
chr10:107904085:AAGAAAAA	8	Long Reads (vamos)	7-15bp	3	2.74	0.396364
chr10:10791937:GGAG	4	Long Reads (vamos)	4-6bp	28	28.4394	41.9429
chr10:107927452:TAAAATGTATGTCCACA	17	Long Reads (vamos)	16bp+	2	2	0
chr10:107934692:TGTTTAATTTTATTTT	16	Long Reads (vamos)	16bp+	3	2.96512	0.0340629
chr10:107938767:TATATATATATACACACACAATGGTGTATA	30	Long Reads (vamos)	16bp+	11	10.8346	0.583552
chr10:107951006:GTGGGGACTTGGAGAACATTTATGTCTAGCTAAGGGATTGTGAATGCACCAATTGGCACTCTGTATCTAGCTCAAGGTTTGTAAATGCACCAATCAGCACTCTGTGTCTAGCTCAGGGTTTGTAAATACACCAATTGACACTCTGTATCTAGCTAATCTA	160	Long Reads (vamos)	16bp+	3	2.97468	0.0249919
chr10:107951551:AAAATGGACCAATCAGCTCTCTGT	24	Long Reads (vamos)	16bp+	3	3	0
chr10:107966868:GTGTACCTAAGATCCA	16	Long Reads (vamos)	16bp+	3	2.98058	0.0192271
chr10:107971887:TATATATATGTTT	13	Long Reads (vamos)	7-15bp	3	3.08571	0.0791209
chr10:107974438:TATGTGTGTGTGTG	14	Long Reads (vamos)	7-15bp	2	1.94737	0.10386
chr10:107974483:ACACAGACACACAC	14	Long Reads (vamos)	7-15bp	2	2.03509	0.15805
chr10:107980024:ATTTT	5	Long Reads (vamos)	4-6bp	13	13.1778	5.86368
chr10:107982083:ATATATATGAAATATA	16	Long Reads (vamos)	16bp+	4	3.85185	0.127778
chr10:107983982:TAGATAGATAGAT	13	Long Reads (vamos)	7-15bp	2	2	0
chr10:107984164:AAAGTTTATCCCAAA	15	Long Reads (vamos)	7-15bp	2	2.01429	0.0142857
chr10:107985242:AA	2	Long Reads (vamos)	2-3bp	53	63.1397	340.847
chr10:107994595:TATATAATA	9	Long Reads (vamos)	7-15bp	8	8.2126	0.311586
chr10:108001010:TTTTTTTTGTTT	12	Long Reads (vamos)	7-15bp	2	2.2521	0.240991
chr10:108006681:TTTTGT	6	Long Reads (vamos)	4-6bp	5	5.24627	0.532881
chr10:108013269:TATATATATCTGTATT	16	Long Reads (vamos)	16bp+	2	1.86408	0.157815
chr10:108015286:TTTTCT	6	Long Reads (vamos)	4-6bp	8	8.54478	0.971664
chr10:108017133:AAAAC	5	Long Reads (vamos)	4-6bp	8	8.02564	0.301061
chr10:108037340:TTTTGATGTCCAGAA	15	Long Reads (vamos)	7-15bp	2	2.02439	0.0240891
chr10:108044543:AATA	4	Long Reads (vamos)	4-6bp	12	12.0508	0.646965
chr10:108048539:TCATTGGCCCAGAGAAT	17	Long Reads (vamos)	16bp+	2	2	0
chr10:108050549:TCTCA	5	Long Reads (vamos)	4-6bp	15	14.0818	3.21343
chr10:108052525:ATATATGTGTGTGTAT	16	Long Reads (vamos)	16bp+	2	2	0.0235294
chr10:108053182:TTTCCTGAGAGACTAATGCTGCTATAAAGAAAGTCAATATTTGATGAGCAA	51	Long Reads (vamos)	16bp+	2	2	0
chr10:108055372:AAAACAAAATAAA	13	Long Reads (vamos)	7-15bp	3	2.93069	0.0651485
chr10:108064364:CCCATACACCCTGTCTGACT	20	Long Reads (vamos)	16bp+	2	1.98851	0.0114943
chr10:108070176:CCTT	4	Long Reads (vamos)	4-6bp	14	14.4264	1.19961
chr10:108087328:TATTATATATATATTA	16	Long Reads (vamos)	16bp+	53	46.4234	540.055
chr10:108125511:GAGTTAAGTCCAACCTCCT	19	Long Reads (vamos)	16bp+	2	1.98701	0.012987
chr10:108128217:TTTA	4	Long Reads (vamos)	4-6bp	11	11.252	0.634421
chr10:108134363:AAAAC	5	Long Reads (vamos)	4-6bp	6	6.07229	0.263003
chr10:108151742:AAAT	4	Long Reads (vamos)	4-6bp	7	6.73958	0.384101
chr10:108157263:TTTTG	5	Long Reads (vamos)	4-6bp	6	5.97468	0.127556
chr10:108173371:TATATGTATATATTGG	16	Long Reads (vamos)	16bp+	4	4	0.047619
chr10:108181516:CTGACCATCAATGGGCAGCA	20	Long Reads (vamos)	16bp+	2	2	0
chr10:108213666:TATGTGAAGCTTACTTTCA	19	Long Reads (vamos)	16bp+	2	1.9878	0.0121951
chr10:10823948:AGAT	4	Long Reads (vamos)	4-6bp	20	20.1032	0.76527
chr10:10825178:TTTTTTG	7	Long Reads (vamos)	7-15bp	7	7.35556	0.932338
chr10:108260053:TATATACACACACA	14	Long Reads (vamos)	7-15bp	4	4.08547	0.21677
chr10:108261193:TTATCTACCTA	11	Long Reads (vamos)	7-15bp	6	5.71552	0.222714
chr10:10827098:TTGT	4	Long Reads (vamos)	4-6bp	7	6.78846	0.556759
chr10:108274555:CTTAAGGCCCAAGGTCT	17	Long Reads (vamos)	16bp+	2	2	0
chr10:1082758:GCACAGCTCCAGCA	14	Long Reads (vamos)	7-15bp	3	3.38462	0.471994
chr10:108283341:TGTATATATATATATATGTATG	22	Long Reads (vamos)	16bp+	4	3.97321	0.0263031
chr10:1082894:AATACTGTTACTTATGTTAGAAATGGTGAGAGGCCTGGAAAATGAAATTTACTAC	55	Long Reads (vamos)	16bp+	3	3	0
chr10:108290892:TTGTT	5	Long Reads (vamos)	4-6bp	5	5.03797	0.190847
chr10:108292484:ATCATTTTTTTTCGCCCATCGTAGATCTTTTTATATGT	38	Long Reads (vamos)	16bp+	2	1.9899	0.010101
chr10:108304724:TAGA	4	Long Reads (vamos)	4-6bp	16	16.3577	0.952952
chr10:108306709:TGTTTTTTTTGTTTT	15	Long Reads (vamos)	7-15bp	3	2.88281	0.167261
chr10:108307318:GATCTAAAAACTGA	14	Long Reads (vamos)	7-15bp	2	1.98571	0.0142857
chr10:108309893:ATTATAATATATAATTACATATCATATTTATATATTGTATATAGGTATATATTATGTATTATATATAATATATAATTATATATTATATATTACATATA	98	Long Reads (vamos)	16bp+	3	2.98734	0.0126582
chr10:108316153:ATATTTTATAATATATTATGTAATTAT	27	Long Reads (vamos)	16bp+	12	12	1.65152
chr10:108316680:TATATATAATAAATGTATATAATTA	25	Long Reads (vamos)	16bp+	4	3.98701	0.012987
chr10:10831720:CAGCACTTTGAGAGGCCAAAGCAGGCGGATTGCCTGAGCTCAGGAGTTCGAGACTATCCTGGCCAACGTGGTAAAACCCTGTATCTACTAAAAATACAAAAATTAGCCGGGAGTGGTGGCAAGTGCCTGTAGTCCCAGCCAGTCAGGAGGCTGAGGCAGGAGAATCACTTGGACCCAGGAGGCGGAGGTTCCAGTGAGCCAAGATCATGCCGCTGCACTCCAGCCTGGGCAACAGAGCGAGACTCCATCTAAAAAAAAAAAATAA	265	Long Reads (vamos)	16bp+	2	2	0
chr10:108323737:TCTA	4	Long Reads (vamos)	4-6bp	16	16.4496	1.51502
chr10:108327876:AGTGAGTGAGCG	12	Long Reads (vamos)	7-15bp	6	5.53788	0.387867
chr10:108327950:ATATTACTGT	10	Long Reads (vamos)	7-15bp	3	2.97468	0.0249919
chr10:108334347:TTTCCATCTGTACGAG	16	Long Reads (vamos)	16bp+	2	2	0
chr10:108340145:TTTGTTATGTTTTTTGTT	18	Long Reads (vamos)	16bp+	3	3.144	0.124258
chr10:108342553:CATGAGTTGAAGTTG	15	Long Reads (vamos)	7-15bp	2	2.14286	0.12406
chr10:108346384:TTTATTTTTTACT	13	Long Reads (vamos)	7-15bp	2	2.19444	0.1581
chr10:108351637:CAAACAAAAAACAAAAAA	18	Long Reads (vamos)	16bp+	2	2	0
chr10:108362248:AAAGCCCATTTCAGCAAAGAGA	22	Long Reads (vamos)	16bp+	2	1.98734	0.0126582
chr10:108363359:GAATAGGAATAACTGAGTAAATAATAAGTTCAT	33	Long Reads (vamos)	16bp+	2	2	0
chr10:108364408:ATTACCCTCCATAATA	16	Long Reads (vamos)	16bp+	2	2	0
chr10:108380089:ACAGTTAAGAATTTGTCCATTATTCAATTCACAAAGCTGATTTTTTTCTTTGATTTTAGTAGGATTTCTACTTTGCTTAAAATCATGATCTAAAAATTGTTTAGAATAAGTTCCTGGATATGTA	124	Long Reads (vamos)	16bp+	2	2	0
chr10:108388042:AAAGAGAG	8	Long Reads (vamos)	7-15bp	6	5.50877	1.42028
chr10:108397469:TATACACATATACACACATATACATATATG	30	Long Reads (vamos)	16bp+	2	1.98611	0.0138889
chr10:108397606:ACCATTCTCCCACTGATGTTTCTATGAACGAT	32	Long Reads (vamos)	16bp+	1	1.45283	0.250135
chr10:10841786:TTTGCTGATACCCACAAAATAAC	23	Long Reads (vamos)	16bp+	2	2	0
chr10:10843175:ACAAAGAAAA	10	Long Reads (vamos)	7-15bp	3	2.94872	0.100796
chr10:108440230:AATAG	5	Long Reads (vamos)	4-6bp	15	14.9508	0.311611
chr10:108444824:AAAAAAT	7	Long Reads (vamos)	7-15bp	4	3.91667	0.338785
chr10:108449058:ATTT	4	Long Reads (vamos)	4-6bp	14	13.7097	0.516654
chr10:108451847:AAAAC	5	Long Reads (vamos)	4-6bp	8	7.96907	0.113617
chr10:108461238:TTTTG	5	Long Reads (vamos)	4-6bp	7	6.9901	0.749901
chr10:108465684:AACT	4	Long Reads (vamos)	4-6bp	13	13.218	2.88391
chr10:108484280:TTGT	4	Long Reads (vamos)	4-6bp	8	8.02564	0.180371
chr10:108484493:TTGCATTTGCTTTTAGGTTCTTGCTCATGAAGTCT	35	Long Reads (vamos)	16bp+	2	1.98765	0.0123457
chr10:108487731:TTTA	4	Long Reads (vamos)	4-6bp	7	6.92473	0.30949
chr10:108492850:TTGTAATCCCCATGTGTTGAGGGAGGGA	28	Long Reads (vamos)	16bp+	2	2	0
chr10:108496490:GAAAG	5	Long Reads (vamos)	4-6bp	21	21.7556	6.23085
chr10:108496669:CTCTCTCAGTCTTGGTA	17	Long Reads (vamos)	16bp+	2	2	0
chr10:108496978:TTTTA	5	Long Reads (vamos)	4-6bp	10	9.72308	0.573882
chr10:108498:ATTTTTATTTATAAT	15	Long Reads (vamos)	7-15bp	2	1.98571	0.0142857
chr10:108500236:CTGTATTTAATATTACTCTTATAC	24	Long Reads (vamos)	16bp+	2	1.9863	0.0136986
chr10:108513572:CCATTGGCATGTCTTTGTCCTGGAGTTCC	29	Long Reads (vamos)	16bp+	2	2	0
chr10:108513857:GAAGCTAAATGATTAGTGACATATGGGATGATGATTCTAATGTATACATATATCTATAAATATGTCTATGTGTAATTACTTGTACCTGTATTAAAGTAAACATGAATTTATATGGAGGTCTCTAACTGTAATCCATGACCACGTGGGTCATTCTCATTGCCTCTCCTTCATTATCTGTAAACTCTGACATCACAATAAGAAAGCTGCTCTCACAATCCACCATTCATTTACTTAATTGTTCGATTTCAGCACACATGAATAGCCCTATCAGAACAGTTAACCAATATCCCCTCTAAAGGGGTTATCAACTA	311	Long Reads (vamos)	16bp+	2	2	0
chr10:108524902:GTTGACTGAGTTCTGAAGGAAAGACTTGCA	30	Long Reads (vamos)	16bp+	2	1.98734	0.0126582
chr10:108526664:TCTTTATGCCAAAGTATATATCTTTGACATATTTTGGAATGGCCCCTCAATGCCATCTTTTGTGGGGGAAATTTGCATTCTGTTGATGATCTCCTTCCCTTACTAGGTTAAGGAAATTAA	120	Long Reads (vamos)	16bp+	2	1.98571	0.0142857
chr10:108534528:GAAGGAAACACTAAACATGG	20	Long Reads (vamos)	16bp+	3	3	0
chr10:108540355:TGAAATTACAATT	13	Long Reads (vamos)	7-15bp	2	2	0
chr10:108545260:AAATATCTCTTCA	13	Long Reads (vamos)	7-15bp	2	1.98551	0.0144928
chr10:108548372:ATATTGTATAATATATAATTATATAATATATATA	34	Long Reads (vamos)	16bp+	7	6.76744	0.180575
chr10:108561109:TAGA	4	Long Reads (vamos)	4-6bp	9	8.89524	0.902381
chr10:108565470:GAAGG	5	Long Reads (vamos)	4-6bp	18	17.5909	1.11381
chr10:108586419:AAAAT	5	Long Reads (vamos)	4-6bp	14	14.2206	2.26209
chr10:10858694:TTGTTGAATGAATGAAAGTAT	21	Long Reads (vamos)	16bp+	2	2.01205	0.0120482
chr10:108599209:ACATTCTCCCCGCCCTTGAAAATGTACTTTGTA	33	Long Reads (vamos)	16bp+	3	3	0
chr10:108603232:AGGAAGACTTATTC	14	Long Reads (vamos)	7-15bp	3	3	0
chr10:108605542:TGTGTCCATGGGTTTTCATTGTTCAACTCTCACTTACGAGTGAG	44	Long Reads (vamos)	16bp+	2	1.78261	0.172002
chr10:108608362:CCATACCATAGA	12	Long Reads (vamos)	7-15bp	2	2	0
chr10:108629263:ACATACACACACATAC	16	Long Reads (vamos)	16bp+	2	1.98864	0.0113636
chr10:108638471:GTTCTCATCTGT	12	Long Reads (vamos)	7-15bp	3	2.97183	0.0277666
chr10:10865119:TAAACAGAATCACCAT	16	Long Reads (vamos)	16bp+	2	2	0
chr10:108652727:AGAAG	5	Long Reads (vamos)	4-6bp	24	24.0963	12.028
chr10:108656371:AAAAGTGTTTATAAAATCTT	20	Long Reads (vamos)	16bp+	2	2	0
chr10:108659571:TTTGTTTTTGT	11	Long Reads (vamos)	7-15bp	2	1.97183	0.0277666
chr10:108661040:AAAAAAAAAAAAAAAA	16	Long Reads (vamos)	16bp+	3	3.10156	0.280942
chr10:108673282:TGAAACCCGGTCT	13	Long Reads (vamos)	7-15bp	2	2	0
chr10:1086753:TAGTTAACGCTGTCCATGTAGT	22	Long Reads (vamos)	16bp+	4	4	0.020202
chr10:108686662:TATTAAAGCCCTAAGAATACCTGAAGACA	29	Long Reads (vamos)	16bp+	2	2	0
chr10:108690703:ATG	3	Long Reads (vamos)	2-3bp	17	17.4173	1.27684
chr10:108700317:GAGGAAGAGGAGAAGGAGAAG	21	Long Reads (vamos)	16bp+	6	5.95902	0.122273
chr10:108702180:AGAG	4	Long Reads (vamos)	4-6bp	11	10.4361	6.06596
chr10:108705855:CAAGAATTTTTTT	13	Long Reads (vamos)	7-15bp	2	2	0.0238095
chr10:108712059:CAAAAACAAAAAAA	14	Long Reads (vamos)	7-15bp	2	1.95833	0.040493
chr10:108717083:TACATGTGTGTATAAATA	18	Long Reads (vamos)	16bp+	2	2	0
chr10:108722035:ACAATATGACAGGAACAAAACCTCAAATATCAATATTGACCTTGGATGTAAACAGCCTAAGT	62	Long Reads (vamos)	16bp+	2	2	0
chr10:108728649:TCAAATGGCTATATTAATAGCCAG	24	Long Reads (vamos)	16bp+	3	2.9898	0.0102041
chr10:108729681:AAATAGAGAT	10	Long Reads (vamos)	7-15bp	3	2.76923	0.201709
chr10:10874301:GAGTAGTGACAAAGAGACTCTGTCTCTTGAAAGAAA	36	Long Reads (vamos)	16bp+	2	1.9863	0.0136986
chr10:108765572:TAGGTATTAAGTATTAGTG	19	Long Reads (vamos)	16bp+	2	2	0
chr10:108775553:GCAAAGGACATGATCCCATTCCCTTTTATG	30	Long Reads (vamos)	16bp+	2	2.09091	0.359457
chr10:108778019:CACACATATGTATATATATGTATATATGTATATGTG	36	Long Reads (vamos)	16bp+	11	11.4219	4.60802
chr10:108783997:AGGTATCTCTTTGCCTTTGGTCTGGAGAGCACATGGCATGTCA	43	Long Reads (vamos)	16bp+	3	3	0
chr10:108807555:AGACTTATATAGGTTTACACT	21	Long Reads (vamos)	16bp+	2	2	0
chr10:108814419:TTTTGAGTTGGTTTTGTC	18	Long Reads (vamos)	16bp+	3	3.24793	0.22135
chr10:10882179:TCTTATAA	8	Long Reads (vamos)	7-15bp	5	4.81633	0.19272
chr10:108826282:AAATATAATACATTTAATATTA	22	Long Reads (vamos)	16bp+	2	2	0
chr10:10882751:TATTATTTTACTCC	14	Long Reads (vamos)	7-15bp	2	2.0989	0.0901099
chr10:108834858:AAAAAAAAAAAT	12	Long Reads (vamos)	7-15bp	3	3.56303	0.637943
chr10:108836150:ACATATATATACACAC	16	Long Reads (vamos)	16bp+	3	2.83962	0.154987
chr10:10883874:TCC	3	Long Reads (vamos)	2-3bp	24	24.1866	2.70929
chr10:108842569:GTAG	4	Long Reads (vamos)	4-6bp	12	11.2136	1.91472
chr10:108846468:TGTGTGTGTGTCTG	14	Long Reads (vamos)	7-15bp	3	2.87156	0.11298
chr10:10884858:GCATGCTCATTGTG	14	Long Reads (vamos)	7-15bp	2	1.97561	0.0240891
chr10:108875245:CAACAGAAAATATGCCAAA	19	Long Reads (vamos)	16bp+	2	1.98684	0.0131579
chr10:108879958:TATATATATA	10	Long Reads (vamos)	7-15bp	4	3.83654	0.138069
chr10:108880018:TTATATATATAAATATATATTATATATAATTATTTATATAA	41	Long Reads (vamos)	16bp+	6	6	0.016
chr10:108886936:TAATTAGCTGTACATGTGTAATTTG	25	Long Reads (vamos)	16bp+	2	2	0
chr10:108894578:CTCTCTCT	8	Long Reads (vamos)	7-15bp	10	9.3871	1.49121
chr10:108900852:AAATATTTTTAAAATA	16	Long Reads (vamos)	16bp+	2	2	0
chr10:10890181:ATGATATATCAGGTTTGAAG	20	Long Reads (vamos)	16bp+	2	2	0.0833333
chr10:108902627:CAATTTCAGTTGCTTCCAGTGTCAACTGCTTT	32	Long Reads (vamos)	16bp+	2	2	0
chr10:10891024:AAC	3	Long Reads (vamos)	2-3bp	9	9.20168	1.02678
chr10:108914993:TTATATAAACATATTTTATATATAAAGATT	30	Long Reads (vamos)	16bp+	4	3.97368	0.02585
chr10:10892142:AGCAAGAAATAATTAAGAA	19	Long Reads (vamos)	16bp+	2	1.97297	0.0266568
chr10:108924929:CTTC	4	Long Reads (vamos)	4-6bp	28	27.7953	2.51331
chr10:108935186:CTAT	4	Long Reads (vamos)	4-6bp	25	24.9762	1.46343
chr10:108936065:ATATATATGTATGA	14	Long Reads (vamos)	7-15bp	3	2.64516	0.296634
chr10:108936797:TACTGTATGTATAATATATACGGTATCTA	29	Long Reads (vamos)	16bp+	18	18.1783	1.7414
chr10:108940178:TTGTAGGTTGTATGAGTATTTTTAATTTGTGAAAAATTTGTGCTAGACTAGACCTCTATTTCC	63	Long Reads (vamos)	16bp+	2	2	0
chr10:108941409:ATATATATATCATATGTATCATTATCTATATACC	34	Long Reads (vamos)	16bp+	3	3.0463	0.0445656
chr10:108941590:ATATATATATATACAAAATATATATATAT	29	Long Reads (vamos)	16bp+	1	1.3956	0.441758
chr10:108944486:TTA	3	Long Reads (vamos)	2-3bp	18	17.8629	2.1843
chr10:108954985:AAAAAAAAAATAAAAAT	17	Long Reads (vamos)	16bp+	2	2.05882	0.0559115
chr10:108955273:CAAA	4	Long Reads (vamos)	4-6bp	7	7.19355	0.331697
chr10:108956670:TCCACTGCAAAGAACTA	17	Long Reads (vamos)	16bp+	2	2	0
chr10:108956758:GGCTTGTACAATCCCTGCTGATTTAGCCCTCTCCTACCTTTAGAACATAGTTATTAGCCTCTTATTTTTCTCTTTTCTCACATAGCTCTACTACACAAATGTGAGAAACAATTATAATTTGTTACTTTTACATTAATTCCCTTCCCTTCTGTTTTGATATATGAGCCTTGGTGAAAAGTAGACCTTTTGGAAACAGGATGGGTTTGAATATCGTGTCCATCACTTACCCTCGACTGACTTTTCACTTTCTTATCCGTAAGATGGAGATAGTAATAGTAGTTAACATAGGATGACAG	296	Long Reads (vamos)	16bp+	2	2	0
chr10:1089584:AGTTCGGCCTTCCCGTGCTCACCCGC	26	Long Reads (vamos)	16bp+	5	5.22222	0.208812
chr10:108963415:ATTT	4	Long Reads (vamos)	4-6bp	8	8.04301	0.193782
chr10:108979346:TTTTTGTTGTTGTTTG	16	Long Reads (vamos)	16bp+	2	2.03448	0.0336808
chr10:108985212:AAAGGGAGGTGGAGAGGA	18	Long Reads (vamos)	16bp+	2	1.98649	0.0135135
chr10:10898882:TAAAAATATTCAAGTGA	17	Long Reads (vamos)	16bp+	3	3	0
chr10:108991109:TATAACCTAATAAAATGA	18	Long Reads (vamos)	16bp+	3	3	0
chr10:109007133:TTATTATGTAG	11	Long Reads (vamos)	7-15bp	2	2.04167	0.040493
chr10:109012213:TTATGT	6	Long Reads (vamos)	4-6bp	4	4.15556	0.20025
chr10:10901822:TACTTTCAACTATAAAGAA	19	Long Reads (vamos)	16bp+	2	2	0
chr10:109023123:TGTTTATTGCCATGCTGTACACAACAGCAAAATATTTGAAATAAATCTAAAGTGCATCAAAAATAAATTATAAATATTAATACATATAAGATGTATAAGGTACATAAAAATAGTGAATGTTATAAAAC	128	Long Reads (vamos)	16bp+	2	1.98571	0.0142857
chr10:109027405:TGTGTGTGTTGTATGTA	17	Long Reads (vamos)	16bp+	3	2.95455	0.0898642
chr10:109032222:CTGGAGGTGATCTACAGCAAAATC	24	Long Reads (vamos)	16bp+	3	2.9881	0.0119048
chr10:109035308:TATATAGATAAATATA	16	Long Reads (vamos)	16bp+	2	2	0
chr10:109040997:TGCCTAGCTAAAGGTTTGTAAATGCACCAATCAGTGTTCTG	41	Long Reads (vamos)	16bp+	3	3	0
chr10:109041180:GGACCAATCAGCTCTCTGTAAAAT	24	Long Reads (vamos)	16bp+	2	2.04167	0.040493
chr10:109041752:GGTGAAACTATCACCTATC	19	Long Reads (vamos)	16bp+	2	1.98795	0.0120482
chr10:109042643:CAGGTTTTCAAGAATGTGTCAGTAAGGGCCACTAAATCTGATTTTTCTCAGTCCTCTTTGTGGTCTAGGAGGACAGGTAAGGGTG	85	Long Reads (vamos)	16bp+	2	1.97183	0.0277666
chr10:109042808:TGTTTCTGCTGCTGCATCAGTGAGCACGACTATTCCTACCAGCAGGGTCAAGGGACCGCTGCAGGTTCTTGGGCAGGGGT	80	Long Reads (vamos)	16bp+	2	1.98571	0.0142857
chr10:109046719:AGAGAAAGAGAGAGAGGAAG	20	Long Reads (vamos)	16bp+	2	1.96	0.0389189
chr10:109046817:GAAAAGACAAAGAGGGAGTCAGAGACAAA	29	Long Reads (vamos)	16bp+	2	2	0
chr10:10904727:ACCCCATACCCTTGATAAATACCATTTT	28	Long Reads (vamos)	16bp+	2	1.98571	0.0142857
chr10:109048262:TGTGTCTAGCTAAAGGTTTGTAAACACACCAGTCAGCACTCTGTGTCTAGCTAAAGGTTTGTAAACACACCAATCAGTGCTCTGTGTCTACCTAATCTAGTGGGGACTTGGAGAACTT	118	Long Reads (vamos)	16bp+	2	2	0
chr10:109048750:CCTTTAAGAGCTGTAACACTCACCGTGAAGGTCTGCAGCTTCACTTCCGAAGTCAGTGAGACCACTAACCCACCAGAAGGAAGAAACTCCAGAC	94	Long Reads (vamos)	16bp+	2	2	0
chr10:109049486:ACACACGCACACAC	14	Long Reads (vamos)	7-15bp	2	2.11828	0.127162
chr10:109052622:AAAAAAAAAAAAAGA	15	Long Reads (vamos)	7-15bp	2	1.99174	0.108264
chr10:10905877:AAAAAAG	7	Long Reads (vamos)	7-15bp	6	5.91111	0.618905
chr10:10906070:AATAAA	6	Long Reads (vamos)	4-6bp	4	4.05063	0.125609
chr10:109064227:TTTTGT	6	Long Reads (vamos)	4-6bp	6	6.2	0.629032
chr10:10906695:TTTCTT	6	Long Reads (vamos)	4-6bp	7	7.70896	1.83195
chr10:10907637:TTTTA	5	Long Reads (vamos)	4-6bp	5	4.792	0.488645
chr10:109091242:GTATTATAAATATTGCTTATAT	22	Long Reads (vamos)	16bp+	2	2.01299	0.012987
chr10:109100145:AAAATAATATTTTT	14	Long Reads (vamos)	7-15bp	2	2	0
chr10:109100844:GAGAGAGAGGAAGAAA	16	Long Reads (vamos)	16bp+	2	2.03	0.09
chr10:109105872:GAAAAATCCCTAGCTCA	17	Long Reads (vamos)	16bp+	3	3.01111	0.0111111
chr10:109119475:GGGGA	5	Long Reads (vamos)	4-6bp	16	15.803	6.52579
chr10:109125160:TGTTTTT	7	Long Reads (vamos)	7-15bp	7	6.74219	0.570805
chr10:109127718:TTTGTTTGTTG	11	Long Reads (vamos)	7-15bp	3	3.26957	0.198627
chr10:109132200:GCAATATCTGCTGTTCT	17	Long Reads (vamos)	16bp+	2	2	0
chr10:10913829:GGAA	4	Long Reads (vamos)	4-6bp	45	45.0451	12.0283
chr10:109144104:ACACATACACAC	12	Long Reads (vamos)	7-15bp	3	3.03797	0.165206
chr10:109148779:TAAAAGATTGTGGAAACCAAGGTTCTTTTGAAGTCT	36	Long Reads (vamos)	16bp+	2	2	0
chr10:109150378:AAAACAAAACGGAAGC	16	Long Reads (vamos)	16bp+	2	2.04808	0.0656273
chr10:10915576:TTTGTT	6	Long Reads (vamos)	4-6bp	6	6.06667	0.130337
chr10:109167645:TTTCATGATGTATGC	15	Long Reads (vamos)	7-15bp	3	2.98701	0.012987
chr10:109185424:TTTCTGAAGTATAATC	16	Long Reads (vamos)	16bp+	2	1.97368	0.0259649
chr10:109191620:GGAA	4	Long Reads (vamos)	4-6bp	20	20.2627	8.69108
chr10:109204373:CTGATCCAGAAAAGACAACTAGATACAGAGCCCCCCGGCT	40	Long Reads (vamos)	16bp+	2	1.98795	0.0120482
chr10:10920529:ATATGTAATTTATCAATGTGTTTT	24	Long Reads (vamos)	16bp+	2	2	0
chr10:10921257:TGTTTGTTTT	10	Long Reads (vamos)	7-15bp	3	3.00935	0.0282137
chr10:109217524:ATATATATAA	10	Long Reads (vamos)	7-15bp	3	3.01053	0.0105263
chr10:109221192:AAAAAAAAAAAG	12	Long Reads (vamos)	7-15bp	3	3.1453	0.245948
chr10:109222566:TGGGTTCAAAGGATTTGTCAAAATTACTTTCCCTTCTTCCTTTACCTTGCATGGCTA	57	Long Reads (vamos)	16bp+	2	2	0
chr10:109229625:AAAATAAAAATAG	13	Long Reads (vamos)	7-15bp	2	1.98571	0.0142857
chr10:1092312:AAGACCGTGTCTCTACTAAAAATACAA	27	Long Reads (vamos)	16bp+	2	2	0
chr10:109240516:GGAA	4	Long Reads (vamos)	4-6bp	56	56.1128	8.96446
chr10:109247102:TCATTTCCTTATATAAAAACATTC	24	Long Reads (vamos)	16bp+	2	2	0
chr10:109248031:AACACAGAGTGTCTGTATAAGCT	23	Long Reads (vamos)	16bp+	2	2	0
chr10:109281863:ATGTCCATATATATACAT	18	Long Reads (vamos)	16bp+	2	1.98837	0.0116279
chr10:10928921:AATAAATGTTTAAATCAATG	20	Long Reads (vamos)	16bp+	3	2.98649	0.0135135
chr10:109311053:CAAAAACAAACAAACAAAAA	20	Long Reads (vamos)	16bp+	2	2.01235	0.0123457
chr10:109319070:TGAAGGCTGAGTAACACACAGACATTGGTTTAATCATTTAAACGTAATTATACCATTTTATTTTTCACCAACATAAAAG	79	Long Reads (vamos)	16bp+	2	2	0
chr10:109319348:CTTTTTTTTTTT	12	Long Reads (vamos)	7-15bp	2	1.89888	0.18284
chr10:109320964:ATCATATATTCAGATATAAC	20	Long Reads (vamos)	16bp+	2	2.04054	0.0394298
chr10:109321101:TATATATATAGATATA	16	Long Reads (vamos)	16bp+	3	3.55422	29.1525
chr10:109321995:TTCTATTGCTTTGCTGAGACT	21	Long Reads (vamos)	16bp+	2	2	0
chr10:109332099:AAAATAATAATAA	13	Long Reads (vamos)	7-15bp	2	1.98864	0.0113636
chr10:109338930:TGCAGAACAGCAAATAT	17	Long Reads (vamos)	16bp+	2	2	0
chr10:109344672:TTTCT	5	Long Reads (vamos)	4-6bp	17	17.6063	24.6215
chr10:109345348:TTTGGATATATTG	13	Long Reads (vamos)	7-15bp	2	1.98571	0.0142857
chr10:109359424:CTCTGTTTCT	10	Long Reads (vamos)	7-15bp	4	3.86517	0.208887
chr10:109361931:ATAAATAATATAATAAATATGTGA	24	Long Reads (vamos)	16bp+	3	3.1236	0.109551
chr10:10937096:TTCTTTTTTGTTTTTCTT	18	Long Reads (vamos)	16bp+	2	2.5042	0.370745
chr10:109375612:ATTATTATTATCCACCAGT	19	Long Reads (vamos)	16bp+	4	3.76852	0.17956
chr10:109379595:CTC	3	Long Reads (vamos)	2-3bp	13	12.8413	0.966603
chr10:109386644:AGGG	4	Long Reads (vamos)	4-6bp	35	35.5039	12.9663
chr10:10939075:TTATCAGTGTGGCCGCTATTGTAACCCCATCACCTAGGCTGTAGTGCTTGATAATTAGCAAG	62	Long Reads (vamos)	16bp+	3	2.23077	0.920424
chr10:10939277:TGT	3	Long Reads (vamos)	2-3bp	11	11.2991	1.3494
chr10:109421991:AAAAAAAAGAA	11	Long Reads (vamos)	7-15bp	3	3.17742	0.488592
chr10:109424612:GTACTTAGACTTTG	14	Long Reads (vamos)	7-15bp	2	2	0
chr10:109428941:TGCACACATACAGATGCACGTG	22	Long Reads (vamos)	16bp+	2	2.01042	0.0104167
chr10:109434010:ACATATACACACAC	14	Long Reads (vamos)	7-15bp	2	1.98734	0.0382993
chr10:109434426:AAAGATTATTTTGTATGGCTA	21	Long Reads (vamos)	16bp+	2	1.98734	0.0126582
chr10:109434777:TGTTTT	6	Long Reads (vamos)	4-6bp	4	3.88095	0.250717
chr10:109437680:AATTACACAAGGGCTCTTAAG	21	Long Reads (vamos)	16bp+	2	2	0
chr10:109438422:CCACTGAAGTTTTTTTCTTTTTTA	24	Long Reads (vamos)	16bp+	2	1.95833	0.0403509
chr10:109444875:GTTTTTTTTTTT	12	Long Reads (vamos)	7-15bp	2	2.10753	0.423095
chr10:109466299:CATTAATTATTTATATCAAAG	21	Long Reads (vamos)	16bp+	3	2.88462	0.103397
chr10:109466680:GTAGTGTAAA	10	Long Reads (vamos)	7-15bp	6	5.88983	0.133058
chr10:109468227:TTGTTTTTTTTTTT	14	Long Reads (vamos)	7-15bp	3	2.63359	0.464709
chr10:1094715:ACACTGGGAAACATGAGGTAATGAACATGGAGAGAGGAGAGTT	43	Long Reads (vamos)	16bp+	17	16.9624	0.0516063
chr10:109499157:AAATATCATCATCTGATATGTTGAGATGAACCATGT	36	Long Reads (vamos)	16bp+	2	2	0
chr10:109499297:TGCCTCAGATGAAAGGCAGTGGTTTCTTTTGTTGTAAACAGCAAGAGAAATTAAAAGAGAAAGCTGATAATGAAAGTGTTTTAATTAGAGCTAAACACTGTTTTCTTTTTTTTTTTTTTTTTTTTTTTTTTTGAGACAGAGTCCCACACTCTTGCCCAGACTGGAGTGCAGTGG	174	Long Reads (vamos)	16bp+	2	1.96694	0.0322314
chr10:109506869:AAAAAAAAAAAAC	13	Long Reads (vamos)	7-15bp	3	2.91892	0.12973
chr10:109523408:TTTCTTTTTTTT	12	Long Reads (vamos)	7-15bp	2	2.31481	0.273797
chr10:109527174:TCTCTCTTTCTCTC	14	Long Reads (vamos)	7-15bp	2	2.31683	0.318614
chr10:109527213:TCTCCCTCCCTCTCCCTCTCTCCTCT	26	Long Reads (vamos)	16bp+	2	2.41837	0.245845
chr10:10953291:TACCATCTATAAT	13	Long Reads (vamos)	7-15bp	2	1.98571	0.0142857
chr10:10954211:TTA	3	Long Reads (vamos)	2-3bp	14	14.1429	3.19543
chr10:109546044:AGACACCTCCCAGTAGGGGACGAC	24	Long Reads (vamos)	16bp+	2	2	0
chr10:109546152:GCAATATTTGTTGTTCT	17	Long Reads (vamos)	16bp+	2	2	0
chr10:109554824:CTTTGAGTAGTATTGACATTTTAATAATATTAAATCTTCTAATCCC	46	Long Reads (vamos)	16bp+	2	2	0
chr10:109555299:TTTGCTTCATAAAAGC	16	Long Reads (vamos)	16bp+	3	2.98901	0.010989
chr10:109555723:AAATATTAACTAAATT	16	Long Reads (vamos)	16bp+	2	2.02564	0.025308
chr10:109563317:CCGCTTTTCTGGGAGGCAAGAACCCCCTGACCCCTTCTCTCCATGTCTCTACCCCTTCT	59	Long Reads (vamos)	16bp+	4	4	0
chr10:109569570:TGTGTGTGCACGTATGCA	18	Long Reads (vamos)	16bp+	4	3.42857	0.416465
chr10:109577361:ATCT	4	Long Reads (vamos)	4-6bp	13	12.8983	2.4682
chr10:10961750:AAAAAAAAAAGA	12	Long Reads (vamos)	7-15bp	2	2.0708	0.0842288
chr10:10962070:AAAGAAAAGAGAGAGGGAGGGAGGGAGGAGGGAGAG	36	Long Reads (vamos)	16bp+	2	2	0
chr10:10962225:AGCACCAC	8	Long Reads (vamos)	7-15bp	3	2.94521	0.0525114
chr10:10962997:TGTTT	5	Long Reads (vamos)	4-6bp	11	11.1636	1.22068
chr10:10963147:CTCCTGCCTCAGC	13	Long Reads (vamos)	7-15bp	2	2	0
chr10:109658458:AATAATAATAAAA	13	Long Reads (vamos)	7-15bp	2	2.30357	0.21332
chr10:109660181:TTTTG	5	Long Reads (vamos)	4-6bp	8	8.36434	0.592781
chr10:109677336:CCATTATATGATCTCTGAATT	21	Long Reads (vamos)	16bp+	2	2	0
chr10:109677516:AACAACTTCACACTCCTCTTGACTTTGGCAGAAAAGATTCAAGTGATGGCATGTAGGTCCAG	62	Long Reads (vamos)	16bp+	2	2	0
chr10:109699921:ACCAATCAGCACTCTGTCAAAAGGG	25	Long Reads (vamos)	16bp+	4	4.04819	0.0708199
chr10:10970059:TATT	4	Long Reads (vamos)	4-6bp	6	6.04819	0.217161
chr10:109704728:TAGGAGTGATGAGAAACCACTGAAGTACTTTAAG	34	Long Reads (vamos)	16bp+	2	2.08	0.0745946
chr10:109710407:TGATCTCACTTATACATG	18	Long Reads (vamos)	16bp+	3	2.96703	0.0322344
chr10:109713959:ACACACACACACACACTC	18	Long Reads (vamos)	16bp+	3	3	0.146789
chr10:10971559:TTG	3	Long Reads (vamos)	2-3bp	15	15.1707	1.51979
chr10:109722942:GCACATGTATACATATGTAACAAACCTGCACATTGT	36	Long Reads (vamos)	16bp+	2	2	0.0235294
chr10:109725109:AAAAAAAAG	9	Long Reads (vamos)	7-15bp	4	3.50769	0.391413
chr10:109732508:TGTATGTGCATATTTGTG	18	Long Reads (vamos)	16bp+	2	2.03158	0.0309071
chr10:109735728:TGCAAACTCACTTTCCACATTTAGATTTGT	30	Long Reads (vamos)	16bp+	2	1.98592	0.0140845
chr10:109735848:TTTTTATTAGCATAGGA	17	Long Reads (vamos)	16bp+	2	2.04054	0.0668271
chr10:109745050:ATGCCCCTTCTTGACTG	17	Long Reads (vamos)	16bp+	2	2	0
chr10:109762268:ACTCTGACTAGTGCC	15	Long Reads (vamos)	7-15bp	2	2	0
chr10:109775636:ATTTTTACA	9	Long Reads (vamos)	7-15bp	4	3.86139	0.140594
chr10:109777645:TTTTGTATTTTTAGTAGAAACGGG	24	Long Reads (vamos)	16bp+	2	2	0
chr10:109791514:ATATATGTATTATATAATATATTACATATAATATATTTATATTCATCTAATATATATTATATTCATATATTATATTATGTATATATTTATATA	93	Long Reads (vamos)	16bp+	3	3.16667	0.140351
chr10:109791967:TATATAT	7	Long Reads (vamos)	7-15bp	13	12.9766	0.952202
chr10:109819979:CCTCTCCACCCTCCTGCAG	19	Long Reads (vamos)	16bp+	3	2.62037	0.237712
chr10:109822900:ATTTACTCTAGTCTAGAATAATATTCTAGC	30	Long Reads (vamos)	16bp+	9	9.864	1.03781
chr10:109839947:AAGA	4	Long Reads (vamos)	4-6bp	32	32.5185	10.4754
chr10:109846939:AGAGGAGAAG	10	Long Reads (vamos)	7-15bp	3	3.48062	0.2672
chr10:109849548:CTTCAACTTTGT	12	Long Reads (vamos)	7-15bp	3	3.02105	0.0846585
chr10:109854886:TTTA	4	Long Reads (vamos)	4-6bp	6	5.72549	0.43875
chr10:109876007:AGCCCCAGGCCCCTGCCTC	19	Long Reads (vamos)	16bp+	2	2	0
chr10:109878962:CCAGGCATGGTGGCTCATGCCTGTAATCCCAGCACTTTGGGAGGCCGAGGTGGGTGGATCACAAGGTCAGGAGTTCAAGACCAGCCTGGCCAAGATGGTGAAACCCCATCTCTACTACAACTACGAAAATTAGCCAGGCGCAGTGGCAGGCGCCTATAATCCCAGCTACTTGGGAGGCTAAGGCAGGAGAATCTCTTGAACCTGGGCAGCAGAGGTTGCAGTGAGCCGAGATCACACCACTGCACTCCAGCCTGGGTGACAGAGTGAGACTCCGTCTCAAAAAATAAAATAAAATAAAATAATAATAATAATTTACATA	319	Long Reads (vamos)	16bp+	2	2	0
chr10:109881548:AGAGAGAGAGGAG	13	Long Reads (vamos)	7-15bp	2	1.80952	0.156053
chr10:10988966:ATCTGTATGAATTTAAG	17	Long Reads (vamos)	16bp+	2	2	0
chr10:109894532:AACAAAAATTAA	12	Long Reads (vamos)	7-15bp	4	3.51938	0.439075
chr10:109918753:AAGG	4	Long Reads (vamos)	4-6bp	49	49.1852	9.6147
chr10:109927283:TTTTTTG	7	Long Reads (vamos)	7-15bp	5	5.0458	0.228655
chr10:109929216:TTTTC	5	Long Reads (vamos)	4-6bp	9	8.98496	2.07553
chr10:109930877:AAAAT	5	Long Reads (vamos)	4-6bp	8	8.04	0.490323
chr10:109936281:ACCTCTGCCCCAAT	14	Long Reads (vamos)	7-15bp	2	1.95122	0.0716652
chr10:109942054:CTGAGGCAGGCAGATCAT	18	Long Reads (vamos)	16bp+	2	2	0
chr10:109942294:AAGG	4	Long Reads (vamos)	4-6bp	35	34.8382	5.81068
chr10:109948339:AAAAG	5	Long Reads (vamos)	4-6bp	6	5.90909	0.366667
chr10:109949993:ATTTATTGCTAAGCTGAAATGTAA	24	Long Reads (vamos)	16bp+	2	2	0
chr10:109955738:TTTTGGTCTTTGTTT	15	Long Reads (vamos)	7-15bp	3	2.792	0.278968
chr10:1099673:AAATGTGCACTAATGGCGGGCATGGTGGAGAGGTGAGGAGGGTGAGCATTGATGCTCAGGAAATTCA	67	Long Reads (vamos)	16bp+	5	4.85294	0.126674
chr10:109983278:TATTT	5	Long Reads (vamos)	4-6bp	11	10.3704	8.8522
chr10:109984591:TTTG	4	Long Reads (vamos)	4-6bp	7	6.98718	0.298535
chr10:110005974:GCT	3	Long Reads (vamos)	2-3bp	19	19.2273	1.56627
chr10:110011919:TTTTTACTGTAAT	13	Long Reads (vamos)	7-15bp	2	1.98571	0.0142857
chr10:110025302:AATAATACTAATTTAATTT	19	Long Reads (vamos)	16bp+	2	2	0
chr10:110040915:TCTCTCTCTCTCGCTC	16	Long Reads (vamos)	16bp+	6	6	0.206897
chr10:110044892:GCTATGTGCATTTG	14	Long Reads (vamos)	7-15bp	2	1.98571	0.0142857
chr10:110054782:TTTTTGTATCTTTAGTAGAGACAGGGTTTCTCCATGTTGGCCAGGCTGGTTTTGAACTCCTGACCTCGTGATCCGCCTTCCTCTGCCTCCCAAAGTGCTGGAATTACAAGCATGAGCCACCGC	123	Long Reads (vamos)	16bp+	2	2	0
chr10:110060106:CTGTTAGCTAAGGAGACAGTCTTGTAAGCTT	31	Long Reads (vamos)	16bp+	2	2	0
chr10:110070175:TATATCTGTAG	11	Long Reads (vamos)	7-15bp	3	2.77108	0.178666
chr10:110078574:TCGTGGACATTGGCTAC	17	Long Reads (vamos)	16bp+	2	1.98718	0.0128205
chr10:110088037:CTTTTTTCTTCCTTTGTGT	19	Long Reads (vamos)	16bp+	2	1.9726	0.0270167
chr10:110089678:TATATATGATATATATATAA	20	Long Reads (vamos)	16bp+	3	3.05376	0.0514259
chr10:110117699:TTGTGTAAAAAAA	13	Long Reads (vamos)	7-15bp	2	1.89333	0.0965766
chr10:1101224:TTCTAAACAACAGATCCGTG	20	Long Reads (vamos)	16bp+	2	2	0
chr10:110127130:TTTTTGT	7	Long Reads (vamos)	7-15bp	4	3.96032	0.294413
chr10:110130855:AAAAAGAAAAAAAACA	16	Long Reads (vamos)	16bp+	2	1.98113	0.0567835
chr10:110166767:AAAAT	5	Long Reads (vamos)	4-6bp	7	7.03361	0.320894
chr10:110173280:TTTTTTTT	8	Long Reads (vamos)	7-15bp	5	4.89062	1.18479
chr10:1101944:GTTCCCGTGCTGCTGTGCGTCCCTGTGACGTGC	33	Long Reads (vamos)	16bp+	12	12.2815	0.382863
chr10:110198166:AA	2	Long Reads (vamos)	2-3bp	28	28.0152	2.61046
chr10:110214610:CCCCCTCCTCCCTACCACCA	20	Long Reads (vamos)	16bp+	2	1.97561	0.0240891
chr10:110215030:GTTTTTTTTTTT	12	Long Reads (vamos)	7-15bp	2	2.08036	0.48898
chr10:110216398:GAGGTAGAGTCCTTGCCCTCATGGAGTGTATTATTCCAGTGCCAGGTTTTA	51	Long Reads (vamos)	16bp+	2	1.9589	0.0399543
chr10:110223574:AAAT	4	Long Reads (vamos)	4-6bp	9	8.9469	0.265013
chr10:110223727:TGGGAAAGTCCAGATCCAAAACGACC	26	Long Reads (vamos)	16bp+	2	2	0
chr10:110224010:AAGAAAACAAAAGGTATGAGGGAAAGGT	28	Long Reads (vamos)	16bp+	2	1.98571	0.0142857
chr10:110226373:GCGTGTGAGGGAGGGGTGCGCGCGTGTGAGGGGAGGGGCGTGTGAGGGAGGGGACGCGCGTGTGAGGAGGGGCGTGTGGGTAGGGGAGCAGGCGTGTAAGGGGGGCGTGTGAGGAGCGCGCGCGTGAGGGGAGGGGCGAGTGAAGGAGGGGAGCGCGCTTGTGATGGGAGGGGCATGTGGGGAAGGGAGCGCGCGTGTGGGAGGGGCGCACGCGTGAGGGGAGGGGCGTATGAGGGAAGGGGAGCGCGCGTGAGGGGAGGGGCGAGCACATGTGAGGGGAGGAGTGTGTGAGGGGAGGGGAGCATGTGAGGGGAGGGGAGCTCGCCTGTGAGGGAGGGGTGCGC	344	Long Reads (vamos)	16bp+	2	2.3913	0.262781
chr10:110235690:AAAT	4	Long Reads (vamos)	4-6bp	7	7.08046	0.539963
chr10:110242814:CTGTTTAGAATAAGTTTATGG	21	Long Reads (vamos)	16bp+	2	1.97183	0.0277666
chr10:11024611:AAT	3	Long Reads (vamos)	2-3bp	11	10.3596	1.22349
chr10:110257951:TAACAAAATTAAGACTAGATATTGAAAGAATTTACTAGTTTTATAAATTTCATT	54	Long Reads (vamos)	16bp+	2	2	0
chr10:110276147:TTTTAAATTTTATGTTTAAACTTGGTCCCAGTCTATAAATTTAGGTCCTTTACTTTTTAAATTACCTAGAAAATCCTCGCTTTTTCATACACAAATTCTATATTATTCAAGTCCAAAGTCAAATTTGAACCTCTTTTACAGGTCTACCTCCTCCAATTACAATCTCTCCATTTATTCAGATT	182	Long Reads (vamos)	16bp+	2	1.98571	0.0142857
chr10:110282314:CCTTTTTAACACAA	14	Long Reads (vamos)	7-15bp	2	1.98969	0.0103093
chr10:11028399:TCTTTTTCTTTTTTT	15	Long Reads (vamos)	7-15bp	2	2.18349	0.151206
chr10:110285084:AAAAC	5	Long Reads (vamos)	4-6bp	4	4.42708	0.331469
chr10:110291659:GGAATACACAGGTAATAAATG	21	Long Reads (vamos)	16bp+	2	2	0
chr10:110300272:AAATATATTTCATCAAAG	18	Long Reads (vamos)	16bp+	2	2	0
chr10:11030371:ACCTCTGTTCCTCGTCTCCAAAGCCCGAGGTCCC	34	Long Reads (vamos)	16bp+	8	7.97938	0.0204038
chr10:110306645:TTTTTAGGATTG	12	Long Reads (vamos)	7-15bp	2	2.09091	0.0835946
chr10:110308526:TTTTTTGAGACGAGTCTCGCTCTGTCGCCTAGGCTGGAGTGCAGTGGCGCAATCTTGGCTCACTGCAACCTCTGCCTGCCAGGTTCAAACAATTCTCCTGCCTCAGCCTCCCAAGTAGCTGGGACTATAGGCGTATGCCACCATGCCCGGCTAATTTTGTTTTGTATTTTTAGTAGAGACAGGGTTTCACCATGCTGGCCAGGCTGGTCTCAAACTCTTGACCTCTGATCCGCCGGCCTCGGCCTCCCAAAGTGCTGGAATTACAGGTGTGAGCCACCGCGCCTGGCCTTGAAATGGCAGTTCTTT	306	Long Reads (vamos)	16bp+	2	2	0
chr10:110312166:TCTGGAACTGGGATGGCCCT	20	Long Reads (vamos)	16bp+	2	2	0
chr10:110313359:TTTTTGTTTG	10	Long Reads (vamos)	7-15bp	4	4.10811	0.0972973
chr10:110316058:AATATAT	7	Long Reads (vamos)	7-15bp	9	8.58407	0.387958
chr10:110330643:GTTGGGAGAAAAGCTGAGTC	20	Long Reads (vamos)	16bp+	2	1.9726	0.0270167
chr10:110331973:TGTCTAGTCAGGGTTTGTAAATGCACCAATCAGCACTCTGTGTCTAGCTCAAGGTTTGTAAACACACCAATCAGCACCCTGTGTCTAGCTCAAGGTTTGTAAATGCACCAATCAGTGCTTTGTGTCTAGCTGATCTGGTGGGGACTTGGAGAACCTTTA	159	Long Reads (vamos)	16bp+	3	2.98936	0.0106383
chr10:110339828:CTAATTTTGTATTTTTAGTAGAGATGAGGTTTCTCCATGTTGCTCAGGCTGGTCTCGAACTCCCGACCTCAGGTGATCCGCCCACCTCAACATCCCAAAGTGCTGGGATTACAGGCGTGAGCCACTGCACCAGGC	135	Long Reads (vamos)	16bp+	2	1.98571	0.0142857
chr10:11034350:TTAATTTTTATTTTTTTTGCTGTGTCTAGATCCCTCCTAGATGTGTTAAAAATATTTCATGTGTTCCTTATTACTAAGAACACTGGAAGAAACTG	95	Long Reads (vamos)	16bp+	2	2	0
chr10:110347186:ATTAAGTTAGGCCTAAAGGTTTCTCTGTACATA	33	Long Reads (vamos)	16bp+	2	2	0
chr10:110356514:CCTTCCCTTCCCTTTTC	17	Long Reads (vamos)	16bp+	2	1.96703	0.0322344
chr10:110357999:CCTGAGCCTCCTATTGCCCGAGTGCCTTGCTGCCCAGGTCAACCCTCACCATCGCTCAT	59	Long Reads (vamos)	16bp+	2	2	0
chr10:110360245:AAAAG	5	Long Reads (vamos)	4-6bp	7	7.10606	2.9047
chr10:110360356:TT	2	Long Reads (vamos)	2-3bp	44	43.5912	20.7287
chr10:110371399:ATAC	4	Long Reads (vamos)	4-6bp	8	8.22131	0.785327
chr10:110376572:TCTCTCCCTTCCTCCC	16	Long Reads (vamos)	16bp+	2	2.07865	0.0732891
chr10:110378453:ATATATTATATGT	13	Long Reads (vamos)	7-15bp	2	1.98718	0.0128205
chr10:110380451:CTTATTTGTAACTTTCATTT	20	Long Reads (vamos)	16bp+	2	2	0
chr10:110385577:AAAAAAC	7	Long Reads (vamos)	7-15bp	7	7.24818	1.3056
chr10:110387159:TGTATATCATT	11	Long Reads (vamos)	7-15bp	7	6.76923	0.194395
chr10:110387649:AG	2	Long Reads (vamos)	2-3bp	78	76.4307	36.4676
chr10:110388307:TCTCTCTCTCTCTC	14	Long Reads (vamos)	7-15bp	2	2.22222	0.211838
chr10:110389131:GTTGTCATGAG	11	Long Reads (vamos)	7-15bp	3	2.98824	0.0355742
chr10:110397630:GCTACATTTCAAGCACTCACACGGCTA	27	Long Reads (vamos)	16bp+	2	2	0
chr10:110399085:AAAACAAAACAA	12	Long Reads (vamos)	7-15bp	3	2.78409	0.171238
chr10:110399506:AACTCATGCATTCTACAAATATGTACTGAG	30	Long Reads (vamos)	16bp+	2	1.9863	0.0136986
chr10:110411738:AGCCCTGGTGTCTCCAAAGAACTAGAGAAAAGCAGCAGCCTTGGACCTTGGAGAATCTTCCAACATCACTTCCC	74	Long Reads (vamos)	16bp+	3	2.53608	0.251289
chr10:110412566:AAAG	4	Long Reads (vamos)	4-6bp	38	38.125	7.10278
chr10:110417960:TTGTTTGTTTTTT	13	Long Reads (vamos)	7-15bp	3	3.02105	0.0421053
chr10:110420963:CATC	4	Long Reads (vamos)	4-6bp	38	37.8702	2.32918
chr10:11042412:AGACTCACATTGATGTTTATTCTGACAGC	29	Long Reads (vamos)	16bp+	2	2	0
chr10:110424194:GGGAGGTGGGGGTAGTTAG	19	Long Reads (vamos)	16bp+	2	1.98611	0.0420579
chr10:110427592:CTTT	4	Long Reads (vamos)	4-6bp	74	73.9197	65.6185
chr10:110428372:TTTGTT	6	Long Reads (vamos)	4-6bp	6	6.07143	0.114857
chr10:110435269:GAAATATAATTGCTATTAAG	20	Long Reads (vamos)	16bp+	2	2	0
chr10:110436069:TTGTTATTATTTAATAAT	18	Long Reads (vamos)	16bp+	2	2.0137	0.0136986
chr10:110438658:TTGTTTGTTGTTGTT	15	Long Reads (vamos)	7-15bp	5	4.76336	0.735878
chr10:110442542:TTTTC	5	Long Reads (vamos)	4-6bp	17	17.125	4.19907
chr10:110443:TTTATTTATTTATT	14	Long Reads (vamos)	7-15bp	2	2.02128	0.0210478
chr10:110450200:AAAAG	5	Long Reads (vamos)	4-6bp	19	19.4265	5.87603
chr10:110454049:AAAAAAAAAAACAACA	16	Long Reads (vamos)	16bp+	3	3.08871	0.260359
chr10:110465524:TTA	3	Long Reads (vamos)	2-3bp	14	13.5656	1.63616
chr10:110466321:GTGGCTCACGCCTGTAATCCCAACACTTTGGGAGGCTGAGGCAGGTAGATCACTTGAGCCCAGGAATTTGAGACCACCCTGGCCAACATGGTGAAACCCTGTCTCTACAAAAACTATGAAAATTAGGCCAGGCACA	136	Long Reads (vamos)	16bp+	2	2	0
chr10:110466745:AAC	3	Long Reads (vamos)	2-3bp	14	14.8	1.88217
chr10:110467059:CAGAATATGGGATGGGGAGGTGC	23	Long Reads (vamos)	16bp+	2	1.98571	0.0142857
chr10:110475466:TTTTTAT	7	Long Reads (vamos)	7-15bp	4	4	0.0481928
chr10:110479187:CAAA	4	Long Reads (vamos)	4-6bp	7	7.37736	0.561006
chr10:110480348:GTGTATGTGTGT	12	Long Reads (vamos)	7-15bp	2	2.9845	2.26538
chr10:110485987:GCCTGTAATCCCAGCACTTTGGGAGACCGAGGTGGGCAGATCACAAGGTCAGGAGTTCAAGACCAGCCTGGCCCACATGGTGAAACTCCGTCTCTACTAAAAATACAAAAATTAGCTGGGCATGGTGGTGGGC	133	Long Reads (vamos)	16bp+	2	2	0
chr10:110498039:GGACACCCTGGCCGT	15	Long Reads (vamos)	7-15bp	2	2.0641	0.112721
chr10:11049958:CTGCTGGTTCCACATGCCAC	20	Long Reads (vamos)	16bp+	2	2	0
chr10:110515974:TTTTATGGTTTTTTTTTTTTTTT	23	Long Reads (vamos)	16bp+	2	2.12791	0.136389
chr10:110521245:ATTTTATTTTAT	12	Long Reads (vamos)	7-15bp	2	1.98701	0.012987
chr10:110526793:TGTGTATATATATATTATATATACATATATATACATATATA	41	Long Reads (vamos)	16bp+	4	3.95283	0.0644205
chr10:110533869:CTGGAAGCTGAGGCATGACAGTCG	24	Long Reads (vamos)	16bp+	2	2	0
chr10:110534003:AG	2	Long Reads (vamos)	2-3bp	44	44.4234	60.7753
chr10:110534105:GGAA	4	Long Reads (vamos)	4-6bp	10	10.1439	2.97912
chr10:110542715:AATACACATGT	11	Long Reads (vamos)	7-15bp	5	4.91304	0.0976354
chr10:110544563:TTTA	4	Long Reads (vamos)	4-6bp	10	10.4661	1.27662
chr10:110553221:ATT	3	Long Reads (vamos)	2-3bp	12	11.8689	1.65208
chr10:110554857:AAAAGA	6	Long Reads (vamos)	4-6bp	7	6.92308	0.614192
chr10:110571770:TTTAAATAAAAATGGGTTCATT	22	Long Reads (vamos)	16bp+	2	2.22222	0.174455
chr10:11058442:TGTTGGTTTTTTT	13	Long Reads (vamos)	7-15bp	2	1.86813	0.293529
chr10:11058769:TTTTG	5	Long Reads (vamos)	4-6bp	5	5.23913	0.315815
chr10:110589409:CACAGTTAAGACAATAAACAC	21	Long Reads (vamos)	16bp+	2	1.98684	0.0131579
chr10:110608409:TTTTTTTTCTTTT	13	Long Reads (vamos)	7-15bp	1	1.29907	0.249339
chr10:110622534:TTTAT	5	Long Reads (vamos)	4-6bp	10	10.5085	3.63668
chr10:110624041:TTACTAATTACAAAGGAG	18	Long Reads (vamos)	16bp+	2	2	0
chr10:110632111:TGA	3	Long Reads (vamos)	2-3bp	9	9.2807	1.58423
chr10:110633299:AAAAT	5	Long Reads (vamos)	4-6bp	7	7.03306	0.432231
chr10:110636410:TTTCCCCCTGGGATTTATAAGTGCAGAAGGTGACTGACCTCCTGACCCAGAGTAAGCTCTTTTAAGGGACTGTGTATTATCATTACTGAACGTTCCTAATGGAAACGTTCT	111	Long Reads (vamos)	16bp+	2	1.98571	0.0142857
chr10:110642799:TTTTGTTTTGTTTG	14	Long Reads (vamos)	7-15bp	2	2.0297	0.0491089
chr10:110644580:CAGCCACCGCCCCCGCCC	18	Long Reads (vamos)	16bp+	2	1.9759	0.0238025
chr10:110649230:ATTT	4	Long Reads (vamos)	4-6bp	9	8.95	0.55303
chr10:110664760:AAAAAGAAAATAAAT	15	Long Reads (vamos)	7-15bp	2	2.14545	0.125438
chr10:110665654:ATATATATGATAACTAAG	18	Long Reads (vamos)	16bp+	2	2.0614	0.0581431
chr10:110673187:TTTCCTT	7	Long Reads (vamos)	7-15bp	5	5.78358	1.59943
chr10:110683035:TGATCACAATTTTTGATTGTGTC	23	Long Reads (vamos)	16bp+	2	1.97531	0.0243827
chr10:110684394:AAAAC	5	Long Reads (vamos)	4-6bp	8	8.28358	1.25732
chr10:110687995:TGTGTG	6	Long Reads (vamos)	4-6bp	8	8.34513	0.81732
chr10:110694231:GAACCAATGAACCCAAT	17	Long Reads (vamos)	16bp+	2	1.98667	0.0133333
chr10:110697897:TTTCTTTTTTTT	12	Long Reads (vamos)	7-15bp	2	1.96639	0.270047
chr10:110702978:TTTTTTTTCTTGTT	14	Long Reads (vamos)	7-15bp	3	2.80451	0.264525
chr10:110715248:AAACAAAAACAAAC	14	Long Reads (vamos)	7-15bp	2	2.40541	0.243243
chr10:110716911:AAAAAAAAAAAG	12	Long Reads (vamos)	7-15bp	2	2	0.142857
chr10:110718605:TTCTTTTTTTTTTT	14	Long Reads (vamos)	7-15bp	2	2	0.142857
chr10:110720621:ATCCCTGCAGTGCCTGTCCCACCCTGCCCCTGCAGCCTGATCTCCTAACCCTC	53	Long Reads (vamos)	16bp+	3	2.77419	0.176718
chr10:110727399:AAAAAAAATAAAT	13	Long Reads (vamos)	7-15bp	3	3.08462	0.57418
chr10:110747752:AAAGAGAAAACTTTTTAGAAAGTTTTCTTTCTG	33	Long Reads (vamos)	16bp+	5	4.63115	0.267782
chr10:1107489:CCCACAAACCCTTCACCTAGGTTCGCCTGTTGTATTGCAGCACTGCTGTCTCTTTACACATGTGTACACACCTCTCTCTGAAACACACG	89	Long Reads (vamos)	16bp+	6	6	0
chr10:110761097:AAAAGAAAAA	10	Long Reads (vamos)	7-15bp	4	3.83582	0.694647
chr10:110766309:TTTGTTT	7	Long Reads (vamos)	7-15bp	5	5.32593	0.624323
chr10:110766844:CCTCCCGGACTGGGTGGCTGGCCGGGCAGAGGGGCTCCTCACTTCCCAGTAGGGGCGGCCGGGCAGAGGTGCCCCTCACCTCCCGGACGGGGCGGCTAGCCGGGTGGGGGGCTGACCCCCCCACCTC	127	Long Reads (vamos)	16bp+	16	15.8443	2.0334
chr10:110768226:GGGAGA	6	Long Reads (vamos)	4-6bp	8	8.29412	1.20174
chr10:110768904:TGACCCTTTGTGGACTTG	18	Long Reads (vamos)	16bp+	2	2	0
chr10:110774651:TGTTTTTTGTTGTT	14	Long Reads (vamos)	7-15bp	4	4.21138	0.168066
chr10:110785053:CCAAAGTGCTAGGATTACAGGTG	23	Long Reads (vamos)	16bp+	2	1.98649	0.0135135
chr10:110791156:TTGCTATCTGCATGATAGGTTCAAAATCAACATC	34	Long Reads (vamos)	16bp+	2	2	0
chr10:110791461:TTATTTGAACTCGGGCCTC	19	Long Reads (vamos)	16bp+	3	2.86667	0.116854
chr10:110792133:TCTA	4	Long Reads (vamos)	4-6bp	14	13.697	2.21282
chr10:110810794:TGTGTGTGCGTGTGTGTGTG	20	Long Reads (vamos)	16bp+	3	3.02542	0.0762712
chr10:110816241:TCAACACCCCAACCCACTCTTCTCCCTCCCCGCCACTGCAGACCATC	47	Long Reads (vamos)	16bp+	7	6.84375	0.154276
chr10:110828419:GCTGCCTGGTA	11	Long Reads (vamos)	7-15bp	3	2.78824	0.168908
chr10:110828804:TTTG	4	Long Reads (vamos)	4-6bp	5	5.46281	3.26736
chr10:110831666:AAAAAAAAAAAA	12	Long Reads (vamos)	7-15bp	2	1.93878	0.346728
chr10:110835306:TTTTCTTTTTT	11	Long Reads (vamos)	7-15bp	4	4.2	0.672868
chr10:110844955:TCTTTTTTTTTTT	13	Long Reads (vamos)	7-15bp	2	2.125	0.194328
chr10:110852795:ATAACTTTGTTTCATT	16	Long Reads (vamos)	16bp+	4	3.97849	0.0212716
chr10:110857161:AAAGTATAAAAAAAAAAAA	19	Long Reads (vamos)	16bp+	2	1.95349	0.12282
chr10:110860287:TGTATGTGTGTGGTGTATGGCATGTA	26	Long Reads (vamos)	16bp+	3	2.90667	0.0857658
chr10:110875316:AAAAAAGGATTTCTCATATAAATAATATTATC	32	Long Reads (vamos)	16bp+	2	2	0
chr10:110878824:CTAATAGGTACCAGGTAGTGTGGAA	25	Long Reads (vamos)	16bp+	2	1.9759	0.0238025
chr10:110885598:AATTTATAAAATATAATTTT	20	Long Reads (vamos)	16bp+	4	3.82759	0.144346
chr10:110890070:ATTTAGTATAATTAATATGAT	21	Long Reads (vamos)	16bp+	2	2	0
chr10:110925438:TTTTTG	6	Long Reads (vamos)	4-6bp	7	6.62295	0.633518
chr10:110929403:TTTCATATCAAAGCTTCTGATGTGGGAATCTTA	33	Long Reads (vamos)	16bp+	2	2	0
chr10:110939591:TTGATGTTAGATTATGACGTATGTCAACT	29	Long Reads (vamos)	16bp+	2	1.99	0.01
chr10:110953589:TCTGTGAACATAGTTTT	17	Long Reads (vamos)	16bp+	2	1.98667	0.0133333
chr10:110969890:ATGAGAAATAATA	13	Long Reads (vamos)	7-15bp	2	1.98571	0.0142857
chr10:110970112:AGAACAGATAGAATT	15	Long Reads (vamos)	7-15bp	2	1.98684	0.0131579
chr10:110975745:GCTTCTCCACA	11	Long Reads (vamos)	7-15bp	2	2.05128	0.127206
chr10:110980940:TTTCATGTAGATGGAAACTTGTTTCATTTCCTGCACTGTTGAATC	45	Long Reads (vamos)	16bp+	2	1.98667	0.0133333
chr10:110981843:TTAT	4	Long Reads (vamos)	4-6bp	12	11.7177	0.952203
chr10:110990229:TCTGGTGGGGACGTGGAGAGTCTTTATGTCTAGCTCAGGGATTGTAAATACACCAATCAGCACCCTGTGTTTAGCTCAAGGTTTGTGAGTGCACCAATGGACACTCTGTATCTAGGTGC	119	Long Reads (vamos)	16bp+	2	2	0
chr10:11100203:AAAT	4	Long Reads (vamos)	4-6bp	11	10.8548	0.417781
chr10:111014631:TTCCTTTTTTTTT	13	Long Reads (vamos)	7-15bp	2	1.99138	0.0781859
chr10:111022006:TTA	3	Long Reads (vamos)	2-3bp	14	13.3471	3.66185
chr10:111029265:TATGTCCTAGTCTCGAGAATG	21	Long Reads (vamos)	16bp+	2	2	0
chr10:111037159:ACACACATATATATACACACACAC	24	Long Reads (vamos)	16bp+	5	5.09756	0.433027
chr10:11104199:CTGATGTATTTATTTGCATT	20	Long Reads (vamos)	16bp+	2	2	0
chr10:111049275:AAGAAATACAAAGGATTGT	19	Long Reads (vamos)	16bp+	2	2	0
chr10:111053021:CTGAGAAGTTAAAGAGCAACC	21	Long Reads (vamos)	16bp+	2	2	0
chr10:111057162:TACTAATTTGTTATAACATGTCTGAACAAGATCTAGTTTGAGG	43	Long Reads (vamos)	16bp+	2	2	0
chr10:111058172:TTTTGTTTCCTTTTAAGTC	19	Long Reads (vamos)	16bp+	2	1.97436	0.0512821
chr10:111058247:AAAACAAAAACCA	13	Long Reads (vamos)	7-15bp	3	2.93548	0.142145
chr10:111060679:TATATATACACATACATACA	20	Long Reads (vamos)	16bp+	2	1.98876	0.0339632
chr10:11106187:TTTA	4	Long Reads (vamos)	4-6bp	16	15.7388	4.51021
chr10:111070909:TTTATTTT	8	Long Reads (vamos)	7-15bp	4	4.1453	0.176982
chr10:11107793:TCCTCTGCCCCCT	13	Long Reads (vamos)	7-15bp	3	2.95604	0.0424908
chr10:11107855:TCCCTTCTCCCATCTCC	17	Long Reads (vamos)	16bp+	4	4.45902	5.27517
chr10:11107988:CTCCCCACTCCCTCCCT	17	Long Reads (vamos)	16bp+	7	11.2132	83.6209
chr10:111086516:CTTCTTTTGTTGGGGGAGAGCTTTTTATTTTGTGAGGGGGAGAACTT	47	Long Reads (vamos)	16bp+	4	4	0
chr10:111097035:GAGGGAGAGACAGAGAGATG	20	Long Reads (vamos)	16bp+	2	1.95745	0.0411805
chr10:111112747:CCTAGGCCTCTGCCCTGCCCAA	22	Long Reads (vamos)	16bp+	2	1.98649	0.0135135
chr10:111125769:GTTTTTTTTTTTT	13	Long Reads (vamos)	7-15bp	2	1.77679	0.28306
chr10:11112804:CATGAGTAAACACAGTGCATTTCCACATGCGTAGCCTATATCTGAAGCTTGTGTCCTGACTGAGT	65	Long Reads (vamos)	16bp+	4	3.98837	0.0116279
chr10:111129368:AGAAAGAAAGAAAT	14	Long Reads (vamos)	7-15bp	3	3	0.0208333
chr10:111137910:TGGAGGATGAGTAGAAGCTTATAATATGCAGAAATGGAAGATTAATGTGGGAAGTGGC	58	Long Reads (vamos)	16bp+	2	2	0
chr10:111160784:TATT	4	Long Reads (vamos)	4-6bp	10	10.7459	1.87705
chr10:111165416:AAAAC	5	Long Reads (vamos)	4-6bp	6	6.04032	0.93332
chr10:111177003:TTTCTGTCCCATTGTTCT	18	Long Reads (vamos)	16bp+	2	2	0
chr10:111179298:ACTAATAATAAATA	14	Long Reads (vamos)	7-15bp	3	2.83908	0.136594
chr10:111180255:CCTCCCTTCCTCCTTT	16	Long Reads (vamos)	16bp+	6	5.56452	0.361657
chr10:111182935:TTTGTTTTTT	10	Long Reads (vamos)	7-15bp	4	4.06716	0.363876
chr10:111195977:TTTTCT	6	Long Reads (vamos)	4-6bp	9	8.69925	2.40886
chr10:111197584:TATACACATATACACA	16	Long Reads (vamos)	16bp+	11	11.0227	0.40406
chr10:111207806:TTGTCAAATGTA	12	Long Reads (vamos)	7-15bp	2	1.9881	0.0119048
chr10:111217079:TTTTGGTTATGTA	13	Long Reads (vamos)	7-15bp	2	2	0
chr10:111230211:ATA	3	Long Reads (vamos)	2-3bp	10	9.94444	2.26089
chr10:111241920:TATGATATATTATATATGATATAATATATCATATATATTATA	42	Long Reads (vamos)	16bp+	24	30.5	655.055
chr10:111247428:CTGGGACATTGAAGCTCCTG	20	Long Reads (vamos)	16bp+	2	2	0
[truncated: 638,481+ more rows]

## Sheet: README
Supplemental Table 2	Tandem Repeats Expansions genotyped in UDN and related statistics
Column Name	Description
ID	Tandem Repeat ID, chromosome:position:repeat_sequence
RS	Tandem Repeat Sequence Length
Technology	Sequencing Tech (Tandem repeat genotyper)
bin	Category by RS length bin
median_RL	median repeat length inferred across individuals
mean_RL	mean repeat length inferred across individuals
var_RL	variance repeat length inferred across individuals
