# Supplementary material for: Integration of transcriptomics and long-read genomics prioritizes structural variants in rare disease
Source: HighWire-hosted journal article supplement (doi:10.1101/gr.279323.124), 2025-03-20
Supplement: Supplemental_Table_S4.xlsx [file Supplemental_Table_S4.xlsx]

## Sheet: Supp_Table4_SV_coordinates_AFs
chrom	start	end	type	length	AF
chr1	10233	10233	INS	33	0.176692
chr1	10343	10411	DEL	68	0.0135338
chr1	10356	10356	INS	41	0.176692
chr1	10466	10466	INS	390	0.00601504
chr1	10683	10683	INS	65	0.176692
chr1	10713	10713	INS	171	0.00601504
chr1	10786	10786	INS	32	0.176692
chr1	10817	10864	DEL	47	0.00150376
chr1	10890	10890	INS	45	0.176692
chr1	19337	19405	DEL	68	0.00300752
chr1	20850	20850	INS	2016	0.00075188
chr1	30907	30945	DEL	38	0.00150376
chr1	34045	34045	INS	3056	0.00225564
chr1	43177	43466	DEL	289	0.00451128
chr1	50942	51057	DEL	115	0.0488722
chr1	54712	54712	INS	38	0.00300752
chr1	54718	54753	DEL	35	0.00827068
chr1	59602	59602	INS	309	0.00150376
chr1	66225	66276	DEL	51	0.199248
chr1	66251	66251	INS	222	0.00451128
chr1	66398	66398	INS	33	0.0075188
chr1	66507	66507	INS	36	0.0075188
chr1	67901	68337	DEL	436	0.0180451
chr1	71498	71538	DEL	40	0.00676692
chr1	83793	84015	DEL	222	0.00075188
chr1	83965	83995	DEL	30	0.00601504
chr1	83965	83965	INS	73	0.00902256
chr1	90160	90160	INS	114	0.0736842
chr1	90259	90259	INS	118	0.0736842
chr1	90427	90427	INS	57	0.0736842
chr1	95085	95085	INS	107	0.00827068
chr1	136347	137031	DEL	684	0.0135338
chr1	136522	136522	INS	182	0.00075188
chr1	136566	136566	INS	1104	0.00150376
chr1	136592	136592	INS	48	0.00676692
chr1	136760	136760	INS	48	0.00676692
chr1	136810	136810	INS	290	0.00075188
chr1	136945	136945	INS	229	0.00075188
chr1	136959	136959	INS	93	0.00676692
chr1	136977	136977	INS	140	0.00075188
chr1	137097	137097	INS	91	0.00676692
chr1	138065	139245	DEL	1180	0.00075188
chr1	157350	157350	INS	143	0.00150376
chr1	180216	180391	DEL	175	0.00827068
chr1	180488	180488	INS	77	0.00075188
chr1	180500	180540	DEL	40	0.0172932
chr1	180631	180704	DEL	73	0.00902256
chr1	180823	180823	INS	36	0.00075188
chr1	180897	180965	DEL	68	0.0233083
chr1	180923	180923	INS	62	0.00075188
chr1	180953	180953	INS	297	0.081203
chr1	181037	181037	INS	32	0.00075188
chr1	181158	181158	INS	72	0.00075188
chr1	181162	181278	DEL	116	0.0105263
chr1	181181	181181	INS	233	0.00075188
chr1	181190	181278	DEL	88	0.0165414
chr1	181218	181457	DEL	239	0.0992481
chr1	181256	181380	DEL	124	0.0992481
chr1	181323	181323	INS	87	0.00075188
chr1	191366	191366	INS	2051	0.062406
chr1	196065	196103	DEL	38	0.0037594
chr1	204562	204562	INS	3073	0.00225564
chr1	257970	257970	INS	88	0.0180451
chr1	261400	261400	INS	39	0.00601504
chr1	264178	265595	DEL	1417	0.00526316
chr1	264579	264649	DEL	70	0.00075188
chr1	264910	267346	DEL	2436	0.00075188
chr1	266903	266963	DEL	60	0.00601504
chr1	269223	269254	DEL	31	0.00075188
chr1	271431	271431	INS	31	0.00075188
chr1	271663	271663	INS	109	0.00075188
chr1	273188	275268	DEL	2080	0.0172932
chr1	275666	275666	INS	34	0.00300752
chr1	279214	279214	INS	61	0.00075188
chr1	350806	350806	INS	40	0.00150376
chr1	356937	375980	DEL	19043	0.00150376
chr1	369468	369468	INS	90	0.00075188
chr1	381524	381524	INS	66	0.00075188
chr1	434686	434686	INS	72	0.00150376
chr1	492196	492196	INS	1119	0.0744361
chr1	503140	503140	INS	30	0.0240602
chr1	596728	596827	DEL	99	0.0451128
chr1	597849	597849	INS	1239	0.00676692
chr1	597887	597887	INS	43	0.0172932
chr1	597955	597955	INS	455	0.0120301
chr1	598001	598001	INS	47	0.012782
chr1	598074	598074	INS	228	0.0120301
chr1	598182	598182	INS	231	0.0120301
chr1	598247	598247	INS	358	0.0120301
chr1	598411	598411	INS	44	0.0172932
chr1	598417	598417	INS	248	0.0120301
chr1	598470	598654	DEL	184	0.00075188
chr1	598551	598551	INS	249	0.0120301
chr1	598583	598628	DEL	45	0.00526316
chr1	598588	598588	INS	43	0.0172932
chr1	598669	598669	INS	621	0.00676692
chr1	598675	598675	INS	46	0.0172932
chr1	598681	598681	INS	242	0.0120301
chr1	600750	600750	INS	234	0.00601504
chr1	601010	601010	INS	130	0.00601504
chr1	602280	602280	INS	171	0.00150376
chr1	606611	606642	DEL	31	0.0270677
chr1	609389	609455	DEL	66	0.00300752
chr1	609404	609404	INS	347	0.00075188
chr1	609430	609430	INS	67	0.0150376
chr1	609508	609577	DEL	69	0.0421053
chr1	609517	609852	DEL	335	0.0037594
chr1	609664	609664	INS	200	0.00601504
chr1	609706	609706	INS	63	0.201504
chr1	609815	609815	INS	127	0.00601504
chr1	609983	609983	INS	190	0.00601504
chr1	609988	610323	DEL	335	0.00526316
chr1	610106	610374	DEL	268	0.00075188
chr1	610180	610180	INS	133	0.00601504
chr1	610307	610307	INS	66	0.00601504
chr1	610315	610586	DEL	271	0.0105263
chr1	610316	610316	INS	199	0.00601504
chr1	610340	610470	DEL	130	0.0105263
chr1	610363	610363	INS	133	0.00526316
chr1	610461	610593	DEL	132	0.0233083
chr1	610470	610470	INS	131	0.00075188
chr1	610549	610549	INS	204	0.00526316
chr1	610583	610583	INS	63	0.00075188
chr1	610748	610748	INS	66	0.00601504
chr1	611335	612059	DEL	724	0.0533835
chr1	611434	611434	INS	198	0.00150376
chr1	611588	611588	INS	101	0.00300752
chr1	611630	611630	INS	614	0.00150376
chr1	611671	611671	INS	202	0.00150376
chr1	611794	611794	INS	104	0.00300752
chr1	611914	611914	INS	103	0.00300752
chr1	612048	612048	INS	194	0.00300752
chr1	612073	612175	DEL	102	0.0037594
chr1	612300	612300	INS	98	0.00300752
chr1	653665	653665	INS	49	0.00075188
chr1	667983	667983	INS	40	0.0120301
chr1	668007	668042	DEL	35	0.00225564
chr1	668423	668423	INS	228	0.0195489
chr1	668433	668433	INS	75	0.0195489
chr1	668537	668537	INS	75	0.106015
chr1	668752	668752	INS	74	0.219549
chr1	668774	668774	INS	367	0.00676692
chr1	668782	669549	DEL	767	0.0037594
chr1	668845	668920	DEL	75	0.0150376
chr1	668910	668910	INS	73	0.00827068
chr1	669021	669021	INS	66	0.00827068
chr1	669151	669151	INS	364	0.00150376
chr1	669160	669160	INS	139	0.00150376
chr1	669255	669483	DEL	228	0.00451128
chr1	669374	669374	INS	74	0.00827068
chr1	669393	669545	DEL	152	0.0330827
chr1	669444	669444	INS	385	0.00150376
chr1	669466	669466	INS	74	0.00827068
chr1	669469	669469	INS	232	0.00150376
chr1	669653	669653	INS	76	0.00827068
chr1	669674	669674	INS	226	0.00150376
chr1	669883	669883	INS	69	0.00827068
chr1	710581	710581	INS	325	0.895489
chr1	711956	712045	DEL	89	0.0135338
chr1	712050	712050	INS	39	0.00827068
chr1	714347	714395	DEL	48	0.984211
chr1	724995	725549	DEL	554	0.00225564
chr1	725045	726062	DEL	1017	0.00075188
chr1	725658	727176	DEL	1518	0.00150376
chr1	726155	727133	DEL	978	0.00150376
chr1	727193	727193	INS	1896	0.0533835
chr1	727216	727216	INS	975	0.0533835
chr1	727288	727288	INS	95	0.00075188
chr1	727329	727329	INS	186	0.00075188
chr1	728182	729364	DEL	1182	0.00601504
chr1	729529	729560	DEL	31	0.0857143
chr1	732311	739132	DEL	6821	0.00150376
chr1	733260	914835	DUP	181575	0.00451128
chr1	735309	738715	DEL	3406	0.00526316
chr1	740746	740746	INS	5669	0.0105263
chr1	744887	744887	INS	28	0.375188
chr1	748216	748216	INS	333	0.188722
chr1	762754	762811	DEL	57	0.00075188
chr1	770508	770508	INS	30	0.0533835
chr1	778698	778698	INS	50	0.0541353
chr1	789483	789483	INS	2363	0.585714
chr1	790150	790150	INS	30	0.00601504
chr1	790470	790554	DEL	84	0.00075188
chr1	790735	790735	INS	40	0.00902256
chr1	791429	791429	INS	1099	0.00075188
chr1	791546	791546	INS	30	0.00902256
chr1	806366	806366	INS	102	0.0466165
chr1	810332	810370	DEL	38	0.00075188
chr1	814551	814551	INS	99	0.15188
chr1	820245	820277	DEL	32	0.0451128
chr1	820881	820881	INS	245	0.00075188
chr1	820906	820941	DEL	35	0.152632
chr1	821004	821004	INS	442	0.00075188
chr1	821384	821384	INS	121	0.00075188
chr1	822338	822968	DEL	630	0.00075188
chr1	822428	822463	DEL	35	0.790226
chr1	822683	822683	INS	35	0.00451128
chr1	823387	823387	INS	31	0.00451128
chr1	823556	823556	INS	145	0.00601504
chr1	831214	833733	DEL	2519	0.0165414
chr1	841395	856499	DEL	15104	0.00150376
chr1	853482	853528	DEL	46	0.0075188
chr1	853605	853653	DEL	48	0.805263
chr1	860178	860209	DEL	31	0.0706767
chr1	866590	866590	INS	47	0.0203008
chr1	866623	866623	INS	144	0.00075188
chr1	866774	866774	INS	101	0.00075188
chr1	866802	866802	INS	49	0.0203008
chr1	866809	866955	DEL	146	0.0037594
chr1	866960	866960	INS	41	0.0203008
chr1	868472	868472	INS	2542	0.0699248
chr1	872685	872685	INS	407	0.0120301
chr1	872688	872895	DEL	207	0.0210526
chr1	872813	872914	DEL	101	0.00150376
chr1	872882	872882	INS	204	0.0120301
chr1	872886	872886	INS	414	0.0120301
chr1	875367	876045	DUP	678	0.0120301
chr1	875831	876434	DUP	603	0.0270677
chr1	875848	875848	INS	322	0.0112782
chr1	875956	875956	INS	159	0.0195489
chr1	875992	875992	INS	2031	0.484962
chr1	875993	875993	INS	1388	0.484962
chr1	876077	876077	INS	41	0.0225564
chr1	876094	876094	INS	316	0.0112782
chr1	876104	876104	INS	2676	0.484962
chr1	876122	876122	INS	74	0.0225564
chr1	876303	876303	INS	139	0.0195489
chr1	877749	877749	INS	30	0.0406015
chr1	878422	878422	INS	1077	0.468421
chr1	879385	879417	DEL	32	0.00075188
chr1	880272	880306	DEL	34	0.00075188
chr1	882645	882732	DEL	87	0.484211
chr1	886226	886226	INS	30	0.748872
chr1	888522	888522	INS	82	0.00451128
chr1	893792	893828	DEL	36	0.97594
chr1	893803	893803	INS	62	0.00075188
chr1	899079	899129	DEL	50	0.00075188
chr1	904489	904586	DEL	97	0.228571
chr1	904504	904504	INS	310	0.00150376
chr1	904593	904593	INS	60	0.00300752
chr1	904638	904638	INS	421	0.00150376
chr1	904658	904658	INS	79	0.00300752
chr1	905047	905078	DEL	31	0.0924812
chr1	907837	907837	INS	32	0.36391
chr1	908686	908732	DEL	46	0.106767
chr1	908961	909269	DEL	308	0.135338
chr1	909042	909175	DEL	133	0.00676692
chr1	909117	909197	DEL	80	0.00676692
chr1	909123	909515	DEL	392	0.00451128
chr1	909132	909445	DEL	313	0.00451128
chr1	909234	909273	DEL	39	0.0105263
chr1	909328	909328	INS	84	0.00150376
chr1	909374	909635	DEL	261	0.0518797
chr1	909423	909423	INS	94	0.00150376
chr1	909471	909555	DEL	84	0.0157895
chr1	909769	909810	DEL	41	0.0075188
chr1	934003	934217	DEL	214	0.0105263
chr1	934015	934015	INS	2549	0.00225564
chr1	934066	934906	DEL	840	0.0037594
chr1	934219	934219	INS	365	0.00902256
chr1	934258	934258	INS	97	0.0210526
chr1	934303	934527	DEL	224	0.00075188
chr1	934306	934887	DEL	581	0.0037594
chr1	934374	934374	INS	263	0.00902256
chr1	934488	934488	INS	159	0.00526316
chr1	934530	934694	DEL	164	0.0120301
chr1	934550	934605	DEL	55	0.00676692
chr1	934671	934671	INS	595	0.00902256
chr1	934699	934866	DEL	167	0.0037594
chr1	934704	934704	INS	203	0.00902256
chr1	934730	934730	INS	51	0.0210526
chr1	934847	934931	DEL	84	0.0120301
chr1	934922	934922	INS	465	0.00902256
chr1	936279	936317	DEL	38	0.67218
chr1	936305	936305	INS	43	0.062406
chr1	939431	939478	DEL	47	0.0609023
chr1	948713	948713	INS	41	0.926316
chr1	964632	964632	INS	408	0.00150376
chr1	964664	964664	INS	75	0.00225564
chr1	964670	964820	DEL	150	0.0646617
chr1	970044	970097	DEL	53	0.00300752
chr1	976756	976756	INS	176	0.00300752
chr1	976778	976995	DEL	217	0.0105263
chr1	976805	976805	INS	809	0.0195489
chr1	976817	976817	INS	55	0.0308271
chr1	976828	976828	INS	328	0.00300752
chr1	976882	976996	DEL	114	0.0120301
chr1	976964	976964	INS	212	0.00676692
chr1	977123	977311	DEL	188	0.111278
chr1	977146	977146	INS	296	0.00225564
chr1	977196	977196	INS	98	0.0443609
chr1	977208	977298	DEL	90	0.111278
chr1	977366	977860	DEL	494	0.0112782
chr1	977392	977392	INS	55	0.0443609
chr1	977461	977461	INS	317	0.00225564
chr1	977642	977642	INS	56	0.0443609
chr1	977643	977643	INS	598	0.0195489
chr1	977779	977865	DEL	86	0.0233083
chr1	977817	977817	INS	151	0.00225564
chr1	977917	977917	INS	56	0.0443609
chr1	977921	977981	DEL	60	0.165414
chr1	979947	979947	INS	45	0.00075188
chr1	984612	984612	INS	30	0.0954887
chr1	988821	988821	INS	46	0.00150376
chr1	992960	992960	INS	127	0.00075188
chr1	996338	996338	INS	193	0.018797
chr1	996344	996344	INS	63	0.0323308
chr1	996404	996404	INS	456	0.00300752
chr1	996535	996535	INS	322	0.00300752
chr1	996547	996547	INS	124	0.018797
chr1	996655	996655	INS	147	0.018797
chr1	996672	996672	INS	79	0.018797
chr1	996780	996780	INS	139	0.018797
chr1	998766	998766	INS	42	0.531579
chr1	1007747	1007779	DEL	32	0.00526316
chr1	1028478	1029089	DEL	611	0.179699
chr1	1028650	1029078	DEL	428	0.179699
chr1	1028655	1028655	INS	104	0.100752
chr1	1029393	1029393	INS	31	0.0120301
chr1	1029637	1029785	DEL	148	0.00601504
chr1	1029663	1029663	INS	113	0.0120301
chr1	1029827	1029858	DEL	31	0.00150376
chr1	1029834	1029834	INS	43	0.00075188
chr1	1030038	1030038	INS	342	0.00075188
chr1	1030041	1030041	INS	102	0.00075188
chr1	1030130	1030130	INS	174	0.00075188
chr1	1030201	1030201	INS	45	0.00075188
chr1	1030358	1030358	INS	37	0.0120301
chr1	1030482	1030482	INS	149	0.00075188
chr1	1030612	1030684	DEL	72	0.00150376
chr1	1030854	1030854	INS	183	0.00075188
chr1	1030890	1030928	DEL	38	0.561654
chr1	1041779	1041826	DEL	47	0.905263
chr1	1049126	1049126	INS	327	0.00075188
chr1	1053216	1053265	DEL	49	0.0112782
chr1	1056613	1056715	DEL	102	0.00075188
chr1	1062058	1062089	DEL	31	0.0308271
chr1	1065028	1065028	INS	27	0.0308271
chr1	1065046	1065315	DEL	269	0.00075188
chr1	1065057	1065057	INS	238	0.00526316
chr1	1065057	1065116	DEL	59	0.208271
chr1	1065180	1065210	DEL	30	0.0661654
chr1	1065186	1065186	INS	30	0.00676692
chr1	1068826	1068826	INS	78	0.747368
chr1	1075629	1075629	INS	130	0.0172932
chr1	1075635	1075679	DEL	44	0.0157895
chr1	1076039	1076098	DEL	59	0.00827068
chr1	1076125	1076445	DEL	320	0.0857143
chr1	1076250	1076509	DEL	259	0.0172932
chr1	1076270	1076302	DEL	32	0.00075188
chr1	1076284	1076790	DEL	506	0.117293
chr1	1076312	1077749	DEL	1437	0.0285714
chr1	1076414	1076499	DEL	85	0.0398496
chr1	1076591	1076591	INS	89	0.0142857
chr1	1076770	1076770	INS	91	0.00150376
chr1	1076797	1077189	DEL	392	0.00526316
chr1	1076812	1077013	DEL	201	0.00075188
chr1	1076997	1076997	INS	79	0.0142857
chr1	1077139	1078334	DEL	1195	0.00526316
chr1	1077147	1077354	DEL	207	0.00676692
chr1	1077332	1077332	INS	195	0.00150376
chr1	1077382	1077382	INS	60	0.0180451
chr1	1077557	1077557	INS	59	0.0300752
chr1	1077761	1078027	DEL	266	0.00225564
chr1	1077878	1077878	INS	88	0.0270677
chr1	1078035	1078346	DEL	311	0.0157895
chr1	1078280	1078280	INS	57	0.00902256
chr1	1078425	1078425	INS	101	0.00902256
chr1	1078564	1078564	INS	123	0.00902256
chr1	1078571	1078571	INS	378	0.0037594
chr1	1078675	1079084	DEL	409	0.00225564
chr1	1078722	1078722	INS	94	0.00902256
chr1	1078739	1079273	DEL	534	0.012782
chr1	1078773	1078773	INS	478	0.0037594
chr1	1078880	1078880	INS	57	0.075188
chr1	1078895	1078982	DEL	87	0.0368421
chr1	1079026	1079026	INS	163	0.0037594
chr1	1079081	1079081	INS	33	0.075188
chr1	1079155	1079335	DEL	180	0.00150376
chr1	1079231	1079231	INS	162	0.0037594
chr1	1079327	1079327	INS	32	0.075188
chr1	1080651	1080651	INS	864	0.00601504
chr1	1080676	1080676	INS	124	0.0706767
chr1	1080714	1080714	INS	332	0.00451128
chr1	1080736	1080736	INS	128	0.0706767
chr1	1080801	1080928	DEL	127	0.0037594
chr1	1080822	1080822	INS	385	0.00451128
chr1	1080871	1080871	INS	212	0.00451128
chr1	1080954	1080954	INS	95	0.0706767
chr1	1080979	1080979	INS	398	0.00451128
chr1	1098167	1099065	DUP	898	0.0684211
chr1	1099107	1099107	INS	5056	0.0157895
chr1	1099149	1099149	INS	143	0.0150376
chr1	1099163	1099163	INS	565	0.0458647
chr1	1099216	1099905	DUP	689	0.0157895
chr1	1099240	1099240	INS	70	0.0150376
chr1	1099432	1099432	INS	652	0.0458647
chr1	1099487	1099487	INS	230	0.00150376
chr1	1099496	1099496	INS	80	0.00225564
chr1	1099521	1099521	INS	2355	0.0157895
chr1	1099594	1099594	INS	332	0.00150376
chr1	1099640	1099640	INS	70	0.00225564
chr1	1102619	1102652	DEL	33	0.0270677
chr1	1108320	1108408	DEL	88	0.0037594
chr1	1108599	1108599	INS	34	0.00150376
chr1	1109109	1109140	DEL	31	0.162406
chr1	1115561	1115601	DEL	40	0.00075188
chr1	1115622	1115622	INS	154	0.0037594
chr1	1123519	1123600	DEL	81	0.0240602
chr1	1124017	1124017	INS	57	0.00977444
chr1	1124046	1124096	DEL	50	0.00526316
chr1	1124144	1124144	INS	32	0.00977444
chr1	1131437	1131437	INS	35	0.00977444
chr1	1134547	1134675	DEL	128	0.00075188
chr1	1134750	1134750	INS	58	0.234586
chr1	1134839	1134874	DEL	35	0.00075188
chr1	1135356	1135356	INS	269	0.00075188
chr1	1139065	1139240	DEL	175	0.0684211
chr1	1139092	1139092	INS	362	0.00075188
chr1	1139132	1139496	DEL	364	0.00601504
chr1	1139139	1139139	INS	125	0.00676692
chr1	1139269	1139453	DEL	184	0.0225564
chr1	1139365	1140092	DEL	727	0.00827068
chr1	1139377	1139377	INS	176	0.00075188
chr1	1139393	1139635	DEL	242	0.00977444
chr1	1139480	1139480	INS	58	0.0105263
chr1	1139505	1139505	INS	245	0.00075188
chr1	1139550	1139731	DEL	181	0.00902256
chr1	1139594	1139594	INS	58	0.0105263
chr1	1139606	1139843	DEL	237	0.0142857
chr1	1139676	1140063	DEL	387	0.0165414
chr1	1139680	1139680	INS	237	0.00225564
chr1	1139817	1140019	DEL	202	0.0165414
chr1	1139851	1139913	DEL	62	0.0270677
chr1	1139892	1140314	DEL	422	0.0330827
chr1	1139952	1139952	INS	58	0.0105263
chr1	1140008	1140617	DEL	609	0.00075188
chr1	1140131	1140352	DEL	221	0.0157895
chr1	1140205	1140266	DEL	61	0.0676692
chr1	1140260	1140260	INS	691	0.00451128
chr1	1140328	1140328	INS	62	0.00676692
chr1	1140378	1140683	DEL	305	0.00300752
chr1	1140480	1140663	DEL	183	0.00300752
chr1	1140581	1140637	DEL	56	0.0947368
chr1	1140635	1140635	INS	118	0.0285714
chr1	1141365	1141365	INS	59	0.00526316
chr1	1145549	1145549	INS	30	0.00150376
chr1	1147244	1147244	INS	140	0.00075188
chr1	1147365	1147365	INS	152	0.00075188
chr1	1148934	1148934	INS	181	0.0240602
chr1	1149612	1149693	DEL	81	0.0278195
chr1	1151438	1151644	DEL	206	0.00902256
chr1	1152627	1152627	INS	86	0.00075188
chr1	1152636	1152678	DEL	42	0.00075188
chr1	1152908	1152908	INS	43	0.00225564
chr1	1153084	1153127	DEL	43	0.0278195
chr1	1157297	1157336	DEL	39	0.370677
chr1	1168050	1168084	DEL	34	0.854135
chr1	1170507	1170545	DEL	38	0.00225564
chr1	1175822	1175822	INS	320	0.00150376
chr1	1175846	1175846	INS	46	0.0037594
chr1	1176130	1176130	INS	100	0.0037594
chr1	1176299	1176299	INS	81	0.0037594
chr1	1184685	1184685	INS	1064	0.00601504
chr1	1184696	1184910	DEL	214	0.0270677
chr1	1184772	1184772	INS	311	0.00075188
chr1	1184794	1184794	INS	208	0.00827068
chr1	1184819	1184819	INS	103	0.00827068
chr1	1184902	1184902	INS	214	0.0984962
chr1	1190035	1190065	DEL	30	0.00075188
chr1	1192448	1192448	INS	68	0.0586466
chr1	1192649	1192649	INS	68	0.0586466
chr1	1192751	1192751	INS	96	0.0586466
chr1	1195865	1195865	INS	268	0.00075188
chr1	1201780	1201780	INS	38	0.00300752
chr1	1201867	1201867	INS	336	0.00451128
chr1	1201944	1201944	INS	75	0.00300752
chr1	1201976	1201976	INS	730	0.00300752
chr1	1202047	1202047	INS	161	0.00451128
chr1	1202155	1202155	INS	371	0.00451128
chr1	1202175	1202175	INS	75	0.00300752
chr1	1202258	1202258	INS	135	0.0105263
chr1	1202267	1202267	INS	34	0.00300752
chr1	1202318	1202318	INS	65	0.00300752
chr1	1202366	1202366	INS	217	0.00451128
chr1	1202462	1202462	INS	297	0.00451128
chr1	1202475	1202475	INS	227	0.00451128
chr1	1202529	1202529	INS	39	0.00300752
chr1	1207340	1207761	DEL	421	0.155639
chr1	1211108	1211149	DEL	41	0.00225564
chr1	1212607	1212607	INS	35	0.0842105
chr1	1225732	1225763	DEL	31	0.0360902
chr1	1226339	1226401	DEL	62	0.0924812
chr1	1227301	1227473	DEL	172	0.0924812
chr1	1240650	1240650	INS	43	0.851128
chr1	1244746	1244746	INS	161	0.00601504
chr1	1244997	1244997	INS	222	0.00601504
chr1	1245061	1245147	DEL	86	0.00225564
chr1	1245078	1245078	INS	154	0.00601504
chr1	1245160	1245160	INS	452	0.788722
chr1	1248053	1248313	DEL	260	0.103759
chr1	1248646	1248974	DEL	328	0.0037594
chr1	1248763	1248896	DEL	133	0.00977444
chr1	1248907	1248971	DEL	64	0.0142857
chr1	1248921	1248921	INS	589	0.00676692
chr1	1248951	1249081	DEL	130	0.0105263
chr1	1248995	1249323	DEL	328	0.056391
chr1	1249036	1249036	INS	65	0.00300752
chr1	1249039	1249039	INS	401	0.00225564
chr1	1249079	1249079	INS	311	0.00225564
chr1	1249186	1249186	INS	199	0.00225564
chr1	1249259	1249565	DEL	306	0.00902256
chr1	1249263	1249263	INS	66	0.00300752
chr1	1249274	1249274	INS	257	0.00225564
chr1	1249335	1249335	INS	62	0.00300752
chr1	1249418	1249418	INS	63	0.00300752
chr1	1249452	1249452	INS	281	0.00225564
chr1	1249645	1249645	INS	61	0.00300752
chr1	1272641	1272641	INS	40	0.0180451
chr1	1282753	1282791	DEL	38	0.00075188
chr1	1284104	1284104	INS	736	0.178195
chr1	1284169	1284169	INS	209	0.178195
chr1	1284181	1284181	INS	128	0.585714
chr1	1284181	1284181	INS	402	0.178195
chr1	1288092	1288092	INS	31	0.0150376
chr1	1288161	1288852	DEL	691	0.00902256
chr1	1288220	1288371	DEL	151	0.0526316
chr1	1288261	1290004	DEL	1743	0.0278195
chr1	1288273	1288273	INS	71	0.00676692
chr1	1288275	1288532	DEL	257	0.0165414
chr1	1288277	1288277	INS	1059	0.00526316
chr1	1288369	1288404	DEL	35	0.0796992
chr1	1288388	1288388	INS	38	0.0150376
chr1	1288472	1289428	DEL	956	0.024812
chr1	1288502	1288502	INS	401	0.0105263
chr1	1288620	1288620	INS	264	0.00150376
chr1	1288666	1289194	DEL	528	0.018797
chr1	1288727	1288727	INS	49	0.0120301
chr1	1288843	1288921	DEL	78	0.0172932
chr1	1288980	1288980	INS	330	0.00676692
chr1	1288998	1288998	INS	142	0.00676692
chr1	1289033	1289164	DEL	131	0.00300752
chr1	1289189	1289302	DEL	113	0.0157895
chr1	1289361	1289361	INS	70	0.00902256
chr1	1289371	1289965	DEL	594	0.0150376
chr1	1289460	1289762	DEL	302	0.00075188
chr1	1289497	1289579	DEL	82	0.0195489
chr1	1289603	1289603	INS	90	0.00225564
chr1	1289641	1289908	DEL	267	0.0105263
chr1	1289716	1289882	DEL	166	0.0105263
chr1	1289775	1289775	INS	62	0.00902256
chr1	1289819	1289909	DEL	90	0.0345865
chr1	1289845	1290133	DEL	288	0.00075188
chr1	1289908	1289908	INS	36	0.00902256
chr1	1290032	1290032	INS	190	0.00225564
chr1	1290104	1290177	DEL	73	0.0240602
chr1	1290147	1290147	INS	576	0.0037594
chr1	1290186	1290186	INS	38	0.00902256
chr1	1293733	1293733	INS	40	0.0383459
chr1	1293766	1293766	INS	158	0.0744361
chr1	1296794	1296854	DEL	60	0.0195489
chr1	1296944	1297441	DEL	497	0.0639098
chr1	1297160	1297431	DEL	271	0.0639098
chr1	1297273	1297273	INS	220	0.00075188
chr1	1297358	1297715	DEL	357	0.0526316
chr1	1297555	1297758	DEL	203	0.0330827
chr1	1297627	1297758	DEL	131	0.0330827
chr1	1299433	1299463	DEL	30	0.00225564
chr1	1307994	1308047	DEL	53	0.00075188
chr1	1310891	1310891	INS	49	0.00526316
chr1	1315754	1315795	DEL	41	0.190977
chr1	1316838	1317136	DEL	298	0.0150376
chr1	1324139	1324139	INS	198	0.00902256
chr1	1324145	1324178	DEL	33	0.0075188
chr1	1324174	1324174	INS	72	0.00451128
chr1	1324790	1324790	INS	79	0.00451128
chr1	1339886	1339886	INS	156	0.00075188
chr1	1339886	1339886	INS	39	0.952632
chr1	1341167	1341197	DEL	30	0.00075188
chr1	1345001	1345038	DEL	37	0.00075188
chr1	1350070	1350070	INS	124	0.00075188
chr1	1350082	1350732	DEL	650	0.827068
chr1	1350111	1351187	DEL	1076	0.00526316
chr1	1350231	1350231	INS	109	0.00075188
chr1	1350336	1350377	DEL	41	0.00526316
chr1	1350388	1351186	DEL	798	0.00526316
chr1	1350398	1350398	INS	39	0.0037594
chr1	1350947	1350947	INS	29	0.0120301
chr1	1351016	1351016	INS	33	0.0120301
chr1	1351071	1351346	DEL	275	0.0203008
chr1	1351091	1351249	DEL	158	0.00902256
chr1	1351252	1351252	INS	76	0.0120301
chr1	1351429	1351429	INS	34	0.0120301
chr1	1358759	1358816	DEL	57	0.00902256
chr1	1366913	1367033	DEL	120	0.180451
chr1	1367091	1367134	DEL	43	0.0112782
chr1	1368182	1368212	DEL	30	0.0172932
chr1	1371964	1373346	DEL	1382	0.00075188
chr1	1381774	1382598	DUP	824	0.248872
chr1	1382003	1382554	DUP	551	0.0315789
chr1	1382046	1382211	DEL	165	0.00075188
chr1	1382110	1382437	DUP	327	0.0315789
chr1	1382311	1382311	INS	132	0.0135338
chr1	1382454	1382454	INS	199	0.0135338
chr1	1382456	1382456	INS	43	0.0443609
chr1	1382576	1382576	INS	144	0.0135338
chr1	1382612	1382651	DEL	39	0.00827068
chr1	1382742	1382742	INS	309	0.0135338
chr1	1382768	1382768	INS	77	0.0345865
chr1	1385440	1385440	INS	86	0.00075188
chr1	1385555	1385555	INS	87	0.00075188
chr1	1412066	1412106	DEL	40	0.0466165
chr1	1426941	1427379	DUP	438	0.0706767
chr1	1427323	1427520	DUP	197	0.0383459
chr1	1427443	1427443	INS	55	0.0233083
chr1	1427460	1427460	INS	650	0.502256
chr1	1427469	1427469	INS	1436	0.175188
chr1	1427470	1427470	INS	1920	0.175188
chr1	1427470	1427470	INS	1136	0.175188
chr1	1428016	1428016	INS	138	0.00075188
chr1	1428046	1428046	INS	403	0.00075188
chr1	1428094	1428094	INS	271	0.00075188
chr1	1428125	1428125	INS	41	0.0233083
chr1	1442857	1442857	INS	32	0.927068
chr1	1443674	1443706	DEL	32	0.440602
chr1	1443785	1443819	DEL	34	0.00075188
chr1	1461623	1461623	INS	39	0.0195489
chr1	1461693	1461731	DEL	38	0.0345865
chr1	1469100	1469133	DEL	33	0.0654135
chr1	1475513	1475547	DEL	34	0.00075188
chr1	1477881	1477881	INS	134	0.0210526
chr1	1479431	1479483	DEL	52	0.0586466
chr1	1480309	1480824	DEL	515	0.0766917
chr1	1481936	1481987	DEL	51	0.018797
chr1	1494680	1494680	INS	445	0.00075188
chr1	1497099	1497099	INS	83	0.00225564
chr1	1497158	1497189	DEL	31	0.00225564
chr1	1499588	1499588	INS	30	0.00075188
chr1	1508184	1510385	DEL	2201	0.00451128
chr1	1509968	1516179	DUP	6211	0.00075188
chr1	1511335	1511335	INS	38	0.00150376
chr1	1516347	1516347	INS	39	0.00075188
chr1	1528365	1528404	DEL	39	0.00225564
chr1	1530533	1530852	DEL	319	0.0781955
chr1	1543679	1543679	INS	199	0.27594
chr1	1543749	1543749	INS	195	0.27594
chr1	1543765	1543765	INS	48	0.00225564
chr1	1546905	1546905	INS	134	0.100752
chr1	1554197	1554241	DEL	44	0.043609
chr1	1565686	1565686	INS	96	0.380451
chr1	1571245	1571281	DEL	36	0.0345865
chr1	1585975	1585975	INS	30	0.0383459
chr1	1593706	1593738	DEL	32	0.00075188
chr1	1595091	1595091	INS	1274	0.0195489
chr1	1595094	1595094	INS	42	0.00601504
chr1	1595096	1595096	INS	225	0.0135338
chr1	1595116	1595180	DEL	64	0.0263158
chr1	1595267	1595307	DEL	40	0.0195489
chr1	1595277	1595277	INS	172	0.00075188
chr1	1595397	1595397	INS	476	0.00150376
chr1	1595545	1595545	INS	158	0.00075188
chr1	1595732	1595732	INS	267	0.00075188
chr1	1595832	1595832	INS	79	0.00225564
chr1	1595859	1595927	DEL	68	0.0496241
chr1	1595968	1596018	DEL	50	0.00601504
chr1	1605517	1605517	INS	558	0.0879699
chr1	1605539	1605578	DEL	39	0.16015
chr1	1605599	1605599	INS	269	0.0150376
chr1	1605657	1605657	INS	110	0.00225564
chr1	1605723	1605723	INS	174	0.00225564
chr1	1606066	1606066	INS	44	0.00601504
chr1	1606325	1606385	DEL	60	0.00075188
chr1	1606386	1606386	INS	106	0.00225564
chr1	1606468	1606513	DEL	45	0.018797
chr1	1627482	1627532	DEL	50	0.0112782
chr1	1643218	1643218	INS	3322	0.0105263
chr1	1650270	1650270	INS	35	0.00075188
chr1	1651425	1651477	DEL	52	0.315789
chr1	1658174	1658174	INS	32	0.00150376
chr1	1660559	1660627	DEL	68	0.00075188
chr1	1660761	1660761	INS	576	0.0037594
chr1	1666975	1667142	DEL	167	0.938346
chr1	1679570	1679877	DEL	307	0.0037594
chr1	1681989	1682022	DEL	33	0.241353
chr1	1693936	1694966	DEL	1030	0.0390977
chr1	1694689	1694720	DEL	31	0.0157895
chr1	1696502	1696502	INS	459	0.0353383
chr1	1716811	1716843	DEL	32	0.00902256
chr1	1717624	1717676	DEL	52	0.91203
chr1	1719636	1719636	INS	33	0.0195489
chr1	1724968	1726925	DEL	1957	0.00075188
chr1	1741960	1742281	DEL	321	0.012782
chr1	1748747	1749206	DEL	459	0.00601504
chr1	1749607	1749607	INS	50	0.900752
chr1	1759305	1759361	DEL	56	0.0037594
chr1	1760683	1760683	INS	48	0.00075188
chr1	1766411	1766445	DEL	34	0.0406015
chr1	1811739	1811739	INS	369	0.00075188
chr1	1845825	1845855	DEL	30	0.220301
chr1	1885907	1885907	INS	328	0.00300752
chr1	1924230	1924230	INS	102	0.781955
chr1	1928253	1928253	INS	33	0.0511278
chr1	1928267	1928298	DEL	31	0.0112782
chr1	1929386	1929386	INS	566	0.00150376
chr1	1929386	1929386	INS	1034	0.00150376
chr1	1932067	1932098	DEL	31	0.00075188
chr1	1934262	1934262	INS	34	0.00075188
chr1	1934640	1934672	DEL	32	0.281955
chr1	1934892	1935092	DEL	200	0.245113
chr1	1934902	1935319	DEL	417	0.243609
chr1	1934994	1935585	DEL	591	0.273684
chr1	1935190	1935585	DEL	395	0.273684
chr1	1935430	1935467	DEL	37	0.00075188
chr1	1935457	1935583	DEL	126	0.0263158
chr1	1937842	1937873	DEL	31	0.52782
chr1	1938259	1938294	DEL	35	0.00075188
chr1	1948936	1948936	INS	106	0.00075188
chr1	1948939	1948939	INS	200	0.459398
chr1	1949055	1949055	INS	80	0.00075188
chr1	1955082	1955082	INS	36	0.384962
chr1	1968937	1969006	DEL	69	0.255639
chr1	1971353	1971353	INS	40	0.00902256
chr1	1979027	1979201	DEL	174	0.278195
chr1	1979275	1979275	INS	58	0.00075188
chr1	1979330	1979380	DEL	50	0.0150376
chr1	1979518	1979518	INS	296	0.00075188
chr1	1979619	1979901	DEL	282	0.0699248
chr1	1979743	1979916	DEL	173	0.0699248
chr1	1980059	1980276	DEL	217	0.269925
chr1	1980215	1980215	INS	222	0.00075188
chr1	1980305	1980376	DEL	71	0.0473684
chr1	1981432	1981432	INS	102	0.179699
chr1	1981438	1981614	DEL	176	0.0112782
chr1	1981538	1981538	INS	34	0.0105263
chr1	1981703	1981703	INS	36	0.0105263
chr1	1981822	1981822	INS	70	0.0233083
chr1	1981962	1981962	INS	202	0.00075188
chr1	1981988	1982092	DEL	104	0.00977444
chr1	1981995	1981995	INS	34	0.0105263
chr1	1982198	1982198	INS	230	0.00075188
chr1	1993706	1993706	INS	152	0.993985
chr1	2005927	2005959	DEL	32	0.0315789
chr1	2019222	2019222	INS	223	0.996992
chr1	2028356	2028356	INS	40	0.00225564
chr1	2031616	2031651	DEL	35	0.166165
chr1	2060458	2060523	DEL	65	0.192481
chr1	2071053	2071053	INS	65	0.00601504
chr1	2080327	2080327	INS	36	0.00977444
chr1	2085635	2085635	INS	55	0.23985
chr1	2085762	2085762	INS	109	0.23985
chr1	2094483	2094531	DEL	48	0.0037594
chr1	2094669	2094669	INS	43	0.00150376
chr1	2106434	2106606	DEL	172	0.0661654
chr1	2106467	2106582	DEL	115	0.0661654
chr1	2106490	2106490	INS	58	0.0195489
chr1	2106547	2106547	INS	180	0.0218045
chr1	2106603	2106776	DEL	173	0.0774436
chr1	2106629	2106629	INS	412	0.0218045
chr1	2106629	2106629	INS	708	0.0819549
chr1	2106653	2106653	INS	59	0.0195489
chr1	2106682	2106682	INS	234	0.0218045
chr1	2106769	2106769	INS	55	0.0195489
chr1	2106812	2106870	DEL	58	0.0654135
chr1	2106856	2106856	INS	159	0.0218045
chr1	2110023	2110023	INS	95	0.00300752
chr1	2110118	2110215	DEL	97	0.845865
chr1	2118000	2118000	INS	30	0.00451128
chr1	2118727	2118757	DEL	30	0.00300752
chr1	2121521	2121521	INS	33	0.00676692
chr1	2121527	2121581	DEL	54	0.117293
chr1	2121530	2121635	DEL	105	0.0255639
chr1	2121673	2121673	INS	219	0.00150376
chr1	2121710	2121710	INS	887	0.0135338
chr1	2121713	2121749	DEL	36	0.0135338
chr1	2121734	2121734	INS	48	0.00601504
chr1	2121782	2121814	DEL	32	0.0180451
chr1	2121952	2121952	INS	400	0.00225564
chr1	2121992	2123068	DEL	1076	0.0037594
chr1	2121996	2122060	DEL	64	0.0075188
chr1	2122052	2122052	INS	40	0.00601504
chr1	2122127	2122250	DEL	123	0.024812
chr1	2122189	2122189	INS	48	0.0233083
chr1	2122345	2122345	INS	155	0.00300752
chr1	2122481	2122481	INS	336	0.00451128
chr1	2122546	2122546	INS	50	0.0112782
chr1	2122600	2122818	DEL	218	0.081203
chr1	2122669	2122761	DEL	92	0.0157895
chr1	2122711	2122711	INS	45	0.0473684
chr1	2122839	2123602	DEL	763	0.00225564
chr1	2122927	2122927	INS	83	0.0120301
chr1	2123014	2123053	DEL	39	0.0210526
chr1	2123048	2123048	INS	238	0.00601504
chr1	2123092	2123208	DEL	116	0.00075188
chr1	2123093	2123093	INS	351	0.00451128
chr1	2123171	2123578	DEL	407	0.00225564
chr1	2123201	2123201	INS	41	0.0120301
chr1	2123220	2123278	DEL	58	0.0135338
chr1	2123255	2123255	INS	116	0.0729323
chr1	2123350	2123350	INS	318	0.0225564
chr1	2123354	2123354	INS	91	0.0729323
chr1	2123425	2123546	DEL	121	0.101504
chr1	2123461	2123461	INS	55	0.0195489
chr1	2123539	2123539	INS	211	0.0225564
chr1	2123661	2123661	INS	71	0.0195489
chr1	2123693	2123693	INS	243	0.0225564
chr1	2123710	2124235	DEL	525	0.00526316
chr1	2123750	2123750	INS	41	0.0195489
chr1	2123765	2123765	INS	763	0.012782
chr1	2123838	2123838	INS	77	0.0195489
chr1	2123957	2124207	DEL	250	0.0210526
chr1	2123995	2124067	DEL	72	0.0894737
chr1	2124011	2124011	INS	131	0.00451128
chr1	2124011	2124011	INS	317	0.0225564
chr1	2124175	2124175	INS	244	0.0225564
chr1	2124196	2124196	INS	53	0.0195489
chr1	2124292	2124292	INS	403	0.0225564
chr1	2124294	2124294	INS	133	0.00451128
chr1	2124352	2124352	INS	228	0.0225564
chr1	2124357	2124393	DEL	36	0.0556391
chr1	2142148	2142232	DEL	84	0.00827068
chr1	2142149	2142149	INS	72	0.0804511
chr1	2142371	2142455	DEL	84	0.600752
chr1	2142380	2142380	INS	41	0.0804511
chr1	2147687	2147721	DEL	34	0.00225564
chr1	2147722	2147722	INS	162	0.370677
chr1	2181687	2181724	DEL	37	0.00075188
chr1	2189621	2189651	DEL	30	0.0172932
chr1	2199822	2206578	DEL	6756	0.00075188
chr1	2211902	2211902	INS	467	0.166917
chr1	2212078	2212078	INS	455	0.166917
chr1	2261958	2262034	DEL	76	0.0105263
chr1	2262063	2262132	DEL	69	0.0736842
chr1	2277659	2277659	INS	71	0.00075188
chr1	2280646	2281012	DEL	366	0.00150376
chr1	2280707	2280923	DEL	216	0.075188
chr1	2280713	2280713	INS	262	0.00225564
chr1	2280730	2280730	INS	80	0.00225564
chr1	2280732	2280819	DEL	87	0.0601504
chr1	2280800	2280800	INS	311	0.00225564
chr1	2280801	2281830	DEL	1029	0.0428571
chr1	2280833	2281026	DEL	193	0.00150376
chr1	2280866	2280866	INS	105	0.0105263
chr1	2280968	2280968	INS	64	0.0105263
chr1	2280991	2280991	INS	196	0.00300752
chr1	2281038	2281760	DEL	722	0.0150376
chr1	2281049	2281049	INS	42	0.0105263
chr1	2281165	2281315	DEL	150	0.018797
chr1	2281167	2281631	DEL	464	0.0150376
chr1	2281272	2281337	DEL	65	0.00902256
chr1	2281299	2281299	INS	247	0.00150376
chr1	2281370	2281370	INS	38	0.0676692
chr1	2281410	2281474	DEL	64	0.00601504
chr1	2281421	2281421	INS	224	0.00150376
chr1	2281441	2281686	DEL	245	0.012782
chr1	2281458	2281458	INS	100	0.00150376
chr1	2281464	2281964	DEL	500	0.012782
chr1	2281531	2281601	DEL	70	0.0270677
chr1	2281635	2281635	INS	103	0.00601504
chr1	2281700	2281700	INS	120	0.00601504
chr1	2281760	2281802	DEL	42	0.0571429
chr1	2281773	2281773	INS	589	0.00225564
chr1	2281878	2281878	INS	81	0.00601504
chr1	2281896	2281896	INS	37	0.0676692
chr1	2281899	2282180	DEL	281	0.00300752
chr1	2281910	2281910	INS	163	0.00601504
chr1	2281935	2282064	DEL	129	0.00977444
chr1	2282045	2282045	INS	128	0.00601504
chr1	2282109	2282410	DEL	301	0.0315789
chr1	2282227	2282227	INS	119	0.00601504
chr1	2282235	2282405	DEL	170	0.0120301
chr1	2282302	2282302	INS	84	0.00601504
chr1	2282405	2282451	DEL	46	0.0428571
chr1	2282502	2282502	INS	106	0.00601504
chr1	2289469	2289469	INS	124	0.00075188
chr1	2289504	2289584	DEL	80	0.00075188
chr1	2289586	2289586	INS	32	0.55188
chr1	2309709	2309745	DEL	36	0.0488722
chr1	2309720	2309720	INS	115	0.00075188
chr1	2325105	2325105	INS	1677	0.00075188
chr1	2325122	2325122	INS	2593	0.0481203
chr1	2325142	2325142	INS	3401	0.0481203
chr1	2325156	2325156	INS	7287	0.155639
chr1	2327152	2327152	INS	68	0.184962
chr1	2327241	2327241	INS	38	0.184962
chr1	2331825	2331825	INS	35	0.0781955
chr1	2331990	2331990	INS	32	0.0781955
chr1	2335836	2335836	INS	30	0.00300752
chr1	2342869	2342869	INS	35	0.0308271
chr1	2348740	2348802	DEL	62	0.0037594
chr1	2388787	2388821	DEL	34	0.00075188
chr1	2390754	2390754	INS	43	0.00300752
chr1	2393036	2393036	INS	42	0.955639
chr1	2401259	2401259	INS	167	0.433835
chr1	2401282	2401282	INS	507	0.0736842
chr1	2401331	2401331	INS	227	0.0736842
chr1	2401414	2401414	INS	151	0.0879699
chr1	2435446	2436337	DUP	891	0.00827068
chr1	2435930	2436603	DUP	673	0.0308271
chr1	2436033	2436033	INS	48	0.00300752
chr1	2436246	2436246	INS	92	0.00300752
chr1	2436324	2436324	INS	51	0.00300752
chr1	2436328	2436328	INS	2028	0.00075188
chr1	2436372	2436448	DEL	76	0.00451128
chr1	2436390	2436506	DEL	116	0.262406
chr1	2436498	2436552	DEL	54	0.0406015
chr1	2436505	2436505	INS	66	0.00300752
chr1	2437507	2437555	DEL	48	0.00150376
chr1	2440014	2440394	DUP	380	0.043609
chr1	2440391	2440391	INS	1355	0.518797
chr1	2440393	2440734	DUP	341	0.152632
chr1	2440395	2440395	INS	2673	0.518797
chr1	2440438	2440438	INS	618	0.0578947
chr1	2440446	2440446	INS	133	0.00075188
chr1	2440613	2440613	INS	67	0.0195489
chr1	2440629	2440697	DEL	68	0.0736842
chr1	2440696	2440696	INS	870	0.518797
chr1	2450678	2450678	INS	377	0.0165414
chr1	2450685	2450685	INS	167	0.0165414
chr1	2459301	2459508	DEL	207	0.00300752
chr1	2459345	2459345	INS	270	0.00075188
chr1	2459370	2459370	INS	63	0.00075188
chr1	2459395	2459491	DEL	96	0.0714286
chr1	2459451	2459643	DEL	192	0.00526316
chr1	2459491	2459491	INS	47	0.00075188
chr1	2459514	2459610	DEL	96	0.00526316
chr1	2459641	2459672	DEL	31	0.216541
chr1	2462252	2462252	INS	62	0.130075
chr1	2468471	2468518	DEL	47	0.118045
chr1	2483886	2483928	DEL	42	0.0902256
chr1	2483902	2483902	INS	35	0.00075188
chr1	2500797	2500836	DEL	39	0.284962
chr1	2514582	2514582	INS	35	0.0233083
chr1	2519404	2519434	DEL	30	0.00451128
chr1	2522784	2522784	INS	372	0.946617
chr1	2522793	2522793	INS	555	0.946617
chr1	2530944	2530974	DEL	30	0.0233083
chr1	2581433	2581468	DEL	35	0.00075188
chr1	2592310	2592310	INS	43	0.00225564
chr1	2592356	2592566	DEL	210	0.369173
chr1	2592389	2592471	DEL	82	0.012782
chr1	2592611	2592611	INS	47	0.00225564
chr1	2595826	2595865	DEL	39	0.0240602
chr1	2595848	2595848	INS	38	0.00150376
chr1	2602117	2602117	INS	80	0.374436
chr1	2618419	2618454	DEL	35	0.00075188
chr1	2628686	2628717	DEL	31	0.00075188
chr1	2634770	2635171	DEL	401	0.194737
chr1	2635045	2635045	INS	66	0.401504
chr1	2649068	2649068	INS	42	0.00150376
chr1	2649967	2649967	INS	40	0.00601504
chr1	2650148	2650229	DEL	81	0.0353383
chr1	2650791	2650791	INS	31	0.00225564
chr1	2650967	2650967	INS	29	0.00075188
chr1	2651388	2651430	DEL	42	0.00300752
chr1	2651584	2651584	INS	40	0.0443609
chr1	2651843	2651892	DEL	49	0.0330827
chr1	2652077	2652077	INS	38	0.00526316
chr1	2652081	2652081	INS	152	0.00075188
chr1	2652308	2652308	INS	36	0.00075188
chr1	2652464	2652464	INS	152	0.00075188
chr1	2652541	2652581	DEL	40	0.0233083
chr1	2652541	2652541	INS	40	0.00225564
chr1	2652832	2652900	DEL	68	0.0150376
chr1	2652854	2652854	INS	78	0.00676692
chr1	2653421	2653421	INS	39	0.0293233
chr1	2653530	2653530	INS	60	0.00451128
chr1	2653607	2653607	INS	82	0.00451128
chr1	2653863	2653863	INS	116	0.00075188
chr1	2653951	2653951	INS	232	0.00075188
chr1	2654216	2654216	INS	38	0.00977444
chr1	2654690	2654690	INS	37	0.0150376
chr1	2655030	2655030	INS	37	0.00225564
chr1	2655106	2655388	DEL	282	0.00075188
chr1	2655215	2655215	INS	38	0.0150376
chr1	2655339	2655339	INS	40	0.00451128
chr1	2655411	2655448	DEL	37	0.00075188
chr1	2655651	2655651	INS	38	0.0157895
chr1	2655793	2656032	DEL	239	0.00150376
chr1	2656388	2656388	INS	77	0.00225564
chr1	2656695	2656695	INS	75	0.00225564
chr1	2657181	2657181	INS	42	0.0075188
chr1	2657695	2657695	INS	37	0.00075188
chr1	2657821	2657821	INS	71	0.00300752
chr1	2658223	2658223	INS	39	0.00451128
chr1	2658459	2658459	INS	117	0.00300752
chr1	2658488	2658526	DEL	38	0.00300752
chr1	2658654	2658694	DEL	40	0.00075188
chr1	2658707	2658841	DEL	134	0.00075188
chr1	2658938	2659013	DEL	75	0.00075188
chr1	2659044	2659044	INS	30	0.00451128
chr1	2659316	2659316	INS	41	0.024812
chr1	2659349	2659589	DEL	240	0.00075188
chr1	2660228	2660228	INS	42	0.00526316
chr1	2660344	2660344	INS	36	0.0218045
chr1	2660564	2660564	INS	39	0.0218045
chr1	2660572	2660572	INS	199	0.00150376
chr1	2660745	2660745	INS	79	0.0165414
chr1	2660982	2660982	INS	82	0.0165414
chr1	2661184	2661184	INS	70	0.00676692
chr1	2661815	2661815	INS	37	0.00300752
chr1	2662344	2662344	INS	40	0.00526316
chr1	2662359	2662359	INS	1708	0.00300752
chr1	2662752	2662752	INS	36	0.00150376
chr1	2662807	2662807	INS	899	0.00300752
chr1	2662817	2662817	INS	559	0.00075188
chr1	2662818	2662818	INS	340	0.00075188
chr1	2662985	2662985	INS	38	0.00225564
chr1	2663447	2663447	INS	40	0.00075188
chr1	2664862	2664862	INS	40	0.0037594
chr1	2664983	2665208	DEL	225	0.00075188
chr1	2665185	2665185	INS	42	0.0037594
chr1	2665424	2665424	INS	523	0.00075188
chr1	2665873	2665873	INS	40	0.00150376
chr1	2666072	2666072	INS	41	0.0766917
chr1	2666200	2666200	INS	85	0.00075188
chr1	2666956	2666956	INS	39	0.00150376
chr1	2667425	2667425	INS	82	0.0075188
chr1	2667454	2667454	INS	559	0.0240602
chr1	2667531	2667531	INS	37	0.00225564
chr1	2667639	2670725	DEL	3086	0.00300752
chr1	2667646	2667646	INS	2072	0.00526316
chr1	2667852	2667852	INS	40	0.00977444
chr1	2668290	2668290	INS	40	0.00526316
chr1	2668422	2668422	INS	40	0.00526316
chr1	2668688	2668688	INS	37	0.00225564
chr1	2669241	2669241	INS	43	0.0037594
chr1	2669511	2669511	INS	81	0.0037594
chr1	2669628	2669628	INS	35	0.024812
chr1	2669767	2669767	INS	34	0.00075188
chr1	2669807	2669807	INS	198	0.00075188
chr1	2669929	2670482	DEL	553	0.00300752
chr1	2670024	2670024	INS	37	0.0142857
chr1	2670302	2670302	INS	1512	0.00526316
chr1	2670501	2670501	INS	40	0.00075188
chr1	2670861	2670981	DEL	120	0.00300752
chr1	2670981	2670981	INS	38	0.00300752
chr1	2671572	2671572	INS	33	0.00150376
chr1	2671738	2671738	INS	38	0.0037594
chr1	2671865	2671865	INS	326	0.0263158
chr1	2671882	2671882	INS	77	0.0796992
chr1	2672096	2672096	INS	109	0.00225564
chr1	2672192	2672192	INS	321	0.0263158
chr1	2672383	2672383	INS	357	0.0263158
chr1	2672576	2672576	INS	38	0.00150376
chr1	2673116	2673116	INS	38	0.00150376
chr1	2673239	2673279	DEL	40	0.00526316
chr1	2673596	2673671	DEL	75	0.00451128
chr1	2673628	2673628	INS	35	0.0037594
chr1	2673743	2673743	INS	81	0.00300752
chr1	2674579	2674579	INS	41	0.00225564
chr1	2675015	2678223	DEL	3208	0.00150376
chr1	2675045	2675045	INS	78	0.0142857
chr1	2675107	2675147	DEL	40	0.0165414
chr1	2675124	2675124	INS	520	0.266165
chr1	2675713	2675713	INS	41	0.00676692
chr1	2676244	2676244	INS	38	0.00150376
chr1	2677326	2677326	INS	37	0.00150376
chr1	2677895	2677895	INS	405	0.00075188
chr1	2677920	2677920	INS	1434	0.00225564
chr1	2677952	2677952	INS	172	0.00075188
chr1	2678889	2678889	INS	41	0.00526316
chr1	2679267	2679305	DEL	38	0.0037594
chr1	2679854	2679854	INS	35	0.0037594
chr1	2679978	2679978	INS	34	0.00075188
chr1	2680208	2680208	INS	39	0.0578947
chr1	2680327	2680327	INS	34	0.0105263
chr1	2680404	2680404	INS	183	0.0180451
chr1	2680527	2680527	INS	42	0.00526316
chr1	2680631	2680631	INS	32	0.00526316
chr1	2680943	2680943	INS	41	0.0285714
chr1	2681287	2681287	INS	114	0.00601504
chr1	2681422	2681422	INS	36	0.0037594
chr1	2681532	2681568	DEL	36	0.00225564
chr1	2681825	2681905	DEL	80	0.00150376
chr1	2681879	2681879	INS	40	0.0233083
chr1	2682000	2682000	INS	39	0.0233083
chr1	2682405	2682405	INS	40	0.0105263
chr1	2682802	2682802	INS	40	0.0037594
chr1	2682914	2682914	INS	113	0.00075188
chr1	2683093	2683093	INS	40	0.00300752
chr1	2683178	2683257	DEL	79	0.00300752
chr1	2683398	2683398	INS	78	0.0172932
chr1	2683415	2683415	INS	438	0.0255639
chr1	2683962	2683962	INS	80	0.0172932
chr1	2684453	2684453	INS	41	0.383459
chr1	2684707	2684707	INS	37	0.383459
chr1	2684915	2684915	INS	37	0.00225564
chr1	2685222	2685222	INS	41	0.00225564
chr1	2685628	2685628	INS	33	0.00451128
chr1	2685787	2685787	INS	37	0.0037594
chr1	2685948	2685948	INS	117	0.00451128
chr1	2686123	2686123	INS	120	0.00451128
chr1	2686264	2686264	INS	39	0.0037594
chr1	2686405	2686405	INS	116	0.00902256
chr1	2686479	2686613	DEL	134	0.00075188
chr1	2686716	2686716	INS	36	0.0037594
chr1	2686840	2686840	INS	39	0.00075188
chr1	2687028	2687028	INS	39	0.0037594
chr1	2687407	2687407	INS	235	0.00676692
chr1	2687927	2687927	INS	31	0.00150376
chr1	2688281	2688281	INS	84	0.00300752
chr1	2688388	2688388	INS	79	0.00300752
chr1	2688478	2688478	INS	444	0.00300752
chr1	2688901	2688901	INS	80	0.00451128
chr1	2689169	2689169	INS	38	0.00150376
chr1	2689387	2689387	INS	38	0.00451128
chr1	2689933	2689933	INS	75	0.00827068
chr1	2690706	2690706	INS	38	0.0165414
chr1	2690709	2690746	DEL	37	0.00902256
chr1	2690906	2690906	INS	39	0.00150376
chr1	2691005	2691163	DEL	158	0.0037594
chr1	2691223	2691223	INS	37	0.00075188
chr1	2691375	2691375	INS	32	0.00225564
chr1	2692029	2692029	INS	39	0.00075188
chr1	2692332	2692332	INS	3145	0.0601504
chr1	2692458	2692458	INS	1528	0.00075188
chr1	2692472	2692472	INS	148	0.00075188
chr1	2693256	2693256	INS	39	0.00526316
chr1	2693694	2693694	INS	39	0.00075188
chr1	2694147	2694147	INS	38	0.0037594
chr1	2694244	2694244	INS	82	0.00075188
chr1	2694752	2694752	INS	42	0.00827068
chr1	2695075	2695152	DEL	77	0.00075188
chr1	2695384	2695664	DEL	280	0.00300752
chr1	2695454	2695454	INS	40	0.00300752
chr1	2695733	2695733	INS	33	0.00150376
chr1	2695778	2695818	DEL	40	0.00300752
chr1	2696164	2696164	INS	40	0.00451128
chr1	2696193	2696395	DEL	202	0.00300752
chr1	2696216	2696216	INS	183	0.00225564
chr1	2696258	2696338	DEL	80	0.0488722
chr1	2696357	2696357	INS	38	0.00150376
chr1	2696606	2696963	DEL	357	0.00075188
chr1	2696670	2696670	INS	40	0.075188
chr1	2696725	2696844	DEL	119	0.00225564
chr1	2696945	2696945	INS	34	0.00827068
chr1	2697257	2697257	INS	36	0.0075188
chr1	2697381	2697381	INS	110	0.00075188
chr1	2697631	2697631	INS	37	0.0180451
chr1	2697762	2697762	INS	39	0.00300752
chr1	2697787	2697946	DEL	159	0.0120301
chr1	2698148	2698308	DEL	160	0.00075188
chr1	2698188	2698188	INS	36	0.00150376
chr1	2698223	2698304	DEL	81	0.00075188
chr1	2698301	2698301	INS	39	0.00225564
chr1	2698437	2698437	INS	94	0.00075188
chr1	2698553	2698592	DEL	39	0.00902256
chr1	2698742	2698796	DEL	54	0.00676692
chr1	2698937	2698937	INS	42	0.00150376
chr1	2699089	2699089	INS	72	0.00150376
chr1	2699388	2699388	INS	36	0.00075188
chr1	2699494	2699494	INS	39	0.00225564
chr1	2699618	2699653	DEL	35	0.0112782
chr1	2700131	2700171	DEL	40	0.00902256
chr1	2700168	2700168	INS	35	0.00150376
chr1	2700515	2700515	INS	38	0.00150376
chr1	2700692	2700808	DEL	116	0.0075188
chr1	2701100	2701100	INS	161	0.0075188
chr1	2701662	2701662	INS	38	0.00150376
chr1	2701828	2701987	DEL	159	0.00075188
chr1	2701906	2701944	DEL	38	0.0120301
chr1	2702116	2702189	DEL	73	0.00150376
chr1	2702481	2702481	INS	43	0.00150376
chr1	2746636	2746636	INS	114	0.00075188
chr1	2746909	2747146	DEL	237	0.00075188
chr1	2747161	2747161	INS	41	0.00075188
chr1	2747270	2747309	DEL	39	0.00075188
chr1	2748080	2748200	DEL	120	0.00601504
chr1	2749471	2749549	DEL	78	0.00902256
chr1	2749534	2749576	DEL	42	0.0165414
chr1	2750127	2750609	DEL	482	0.0481203
chr1	2750457	2750457	INS	43	0.00075188
chr1	2750478	2750518	DEL	40	0.0969925
chr1	2750730	2753419	DEL	2689	0.0601504
chr1	2750785	2750822	DEL	37	0.0135338
chr1	2750880	2750880	INS	38	0.00451128
chr1	2750895	2751096	DEL	201	0.00225564
chr1	2751061	2751099	DEL	38	0.00601504
chr1	2751217	2751295	DEL	78	0.00075188
chr1	2751475	2751716	DEL	241	0.00300752
chr1	2751586	2751628	DEL	42	0.0180451
chr1	2751866	2751866	INS	36	0.00827068
chr1	2751895	2752137	DEL	242	0.0180451
chr1	2751967	2751967	INS	39	0.00827068
chr1	2752242	2752282	DEL	40	0.0270677
chr1	2752734	2753074	DEL	340	0.00300752
chr1	2753266	2753540	DEL	274	0.00526316
chr1	2753269	2753417	DEL	148	0.00075188
chr1	2753309	2753346	DEL	37	0.00075188
chr1	2753410	2753449	DEL	39	0.00676692
chr1	2753696	2754058	DEL	362	0.00977444
chr1	2753967	2754648	DEL	681	0.00601504
chr1	2754043	2755167	DEL	1124	0.00601504
chr1	2754068	2754146	DEL	78	0.00827068
chr1	2754186	2754453	DEL	267	0.0150376
chr1	2754257	2754377	DEL	120	0.0112782
chr1	2754319	2754319	INS	36	0.00451128
chr1	2754707	2755108	DEL	401	0.00075188
chr1	2755259	2755379	DEL	120	0.0112782
chr1	2755400	2755439	DEL	39	0.0180451
chr1	2755729	2755729	INS	38	0.00225564
chr1	2756246	2756246	INS	38	0.00225564
chr1	2756336	2756616	DEL	280	0.00150376
chr1	2756603	2756603	INS	39	0.00075188
chr1	2756695	2756735	DEL	40	0.0225564
chr1	2756714	2760811	DEL	4097	0.00300752
chr1	2756903	2756903	INS	2607	0.00150376
chr1	2757100	2757100	INS	390	0.00075188
chr1	2757226	2757307	DEL	81	0.0887218
chr1	2757536	2757615	DEL	79	0.00225564
chr1	2757648	2757648	INS	39	0.00451128
chr1	2757770	2758051	DEL	281	0.00075188
chr1	2758033	2758033	INS	121	0.00075188
chr1	2758073	2758109	DEL	36	0.0037594
chr1	2758285	2758404	DEL	119	0.018797
chr1	2758303	2758303	INS	160	0.00075188
chr1	2758640	2758680	DEL	40	0.00676692
chr1	2758959	2758991	DEL	32	0.00601504
chr1	2759180	2759180	INS	1511	0.00075188
chr1	2759277	2759277	INS	74	0.0157895
chr1	2759319	2759359	DEL	40	0.00075188
chr1	2759684	2759723	DEL	39	0.00150376
chr1	2759786	2759826	DEL	40	0.00451128
chr1	2759886	2759886	INS	38	0.00676692
chr1	2760002	2760043	DEL	41	0.00150376
chr1	2760528	2760528	INS	41	0.00075188
chr1	2761287	2761407	DEL	120	0.0105263
chr1	2761332	2761332	INS	36	0.00075188
chr1	2761898	2763384	DEL	1486	0.00300752
chr1	2761955	2764247	DEL	2292	0.00300752
chr1	2761956	2761956	INS	1491	0.00225564
chr1	2761961	2771513	DEL	9552	0.00300752
chr1	2761970	2761970	INS	397	0.00075188
chr1	2762017	2762176	DEL	159	0.448872
chr1	2762095	2762095	INS	75	0.00300752
chr1	2762265	2762265	INS	259	0.00075188
chr1	2762325	2762445	DEL	120	0.00300752
chr1	2762425	2762425	INS	35	0.00150376
chr1	2762468	2762667	DEL	199	0.00601504
chr1	2762971	2763012	DEL	41	0.00601504
chr1	2763883	2764084	DEL	201	0.52782
chr1	2763980	2763980	INS	3315	0.00225564
chr1	2763990	2763990	INS	820	0.00075188
chr1	2764083	2764083	INS	1809	0.00225564
chr1	2764085	2764166	DEL	81	0.00526316
chr1	2764495	2764495	INS	118	0.00150376
chr1	2765311	2765351	DEL	40	0.0075188
chr1	2765593	2765674	DEL	81	0.00601504
chr1	2765741	2765741	INS	155	0.00225564
chr1	2765761	2765761	INS	40	0.00300752
chr1	2765836	2765836	INS	164	0.00075188
chr1	2766262	2766342	DEL	80	0.00075188
chr1	2767227	2767227	INS	1117	0.00827068
chr1	2767437	2767437	INS	202	0.00075188
chr1	2767477	2767477	INS	3534	0.00225564
chr1	2767532	2769190	DEL	1658	0.00150376
chr1	2767544	2771424	DEL	3880	0.00075188
chr1	2767619	2767755	DEL	136	0.00300752
chr1	2767650	2767650	INS	197	0.00075188
chr1	2767957	2768403	DEL	446	0.00075188
chr1	2767959	2767995	DEL	36	0.00225564
chr1	2768208	2768364	DEL	156	0.0428571
chr1	2768511	2768722	DEL	211	0.00075188
chr1	2768676	2768676	INS	123	0.00075188
chr1	2768776	2768816	DEL	40	0.00075188
chr1	2768904	2770197	DEL	1293	0.00225564
chr1	2769029	2867919	DEL	98890	0.00075188
chr1	2769183	2769183	INS	85	0.0075188
chr1	2769273	2771250	DEL	1977	0.00075188
chr1	2769331	2769623	DEL	292	0.00150376
chr1	2769405	2769405	INS	72	0.0075188
chr1	2769648	2776982	DEL	7334	0.00676692
chr1	2769887	2770811	DEL	924	0.00300752
chr1	2769889	2769924	DEL	35	0.00150376
chr1	2769918	2769918	INS	77	0.0075188
chr1	2770853	2770892	DEL	39	0.00225564
chr1	2770962	2770999	DEL	37	0.0887218
chr1	2771136	2771338	DEL	202	0.111278
chr1	2771268	2771431	DEL	163	0.00150376
chr1	2771281	2771281	INS	76	0.00075188
chr1	2771291	2775031	DEL	3740	0.00676692
chr1	2772521	2772521	INS	319	0.00075188
chr1	2772567	2772769	DEL	202	0.00075188
chr1	2772679	2772841	DEL	162	0.0849624
chr1	2772701	2772742	DEL	41	0.00902256
chr1	2773115	2773155	DEL	40	0.00526316
chr1	2773379	2773418	DEL	39	0.0781955
chr1	2774849	2775052	DEL	203	0.00827068
chr1	2776082	2776122	DEL	40	0.00150376
chr1	2776328	2776448	DEL	120	0.0676692
chr1	2776956	2776956	INS	195	0.00150376
chr1	2776960	2776960	INS	392	0.037594
chr1	2777015	2777015	INS	408	0.037594
chr1	2777296	2777296	INS	406	0.037594
chr1	2788291	2788353	DEL	62	0.00150376
chr1	2798207	2798255	DEL	48	0.409774
chr1	2798786	2798826	DEL	40	0.00827068
chr1	2820268	2820268	INS	414	0.024812
chr1	2820312	2820363	DEL	51	0.012782
chr1	2820362	2820362	INS	34	0.00075188
chr1	2838278	2838316	DEL	38	0.00075188
chr1	2848622	2849411	DUP	789	0.117293
chr1	2848793	2849740	DUP	947	0.00075188
chr1	2849051	2849051	INS	1198	0.00300752
chr1	2849158	2849158	INS	2013	0.00300752
chr1	2849171	2849171	INS	246	0.00451128
chr1	2849239	2849239	INS	117	0.00451128
chr1	2849368	2849368	INS	408	0.00451128
chr1	2849559	2849559	INS	155	0.00451128
chr1	2852021	2852021	INS	104	0.00075188
chr1	2852145	2852344	DEL	199	0.0135338
chr1	2852178	2852229	DEL	51	0.0218045
chr1	2852244	2852451	DEL	207	0.0360902
chr1	2852479	2852632	DEL	153	0.00300752
chr1	2852698	2852800	DEL	102	0.331579
chr1	2852770	2852820	DEL	50	0.0962406
chr1	2859018	2859562	DUP	544	0.0669173
chr1	2859238	2859316	DEL	78	0.0909774
chr1	2859251	2859251	INS	510	0.108271
chr1	2859272	2859272	INS	1286	0.11203
chr1	2859286	2859286	INS	732	0.108271
chr1	2859439	2859439	INS	75	0.0669173
chr1	2859448	2859448	INS	172	0.0338346
chr1	2859515	2859515	INS	197	0.0338346
chr1	2859521	2859521	INS	3883	0.0526316
chr1	2859545	2859545	INS	1190	0.11203
chr1	2863185	2863185	INS	48	0.978947
chr1	2873008	2873062	DEL	54	0.00075188
chr1	2877545	2877545	INS	49	0.559398
chr1	2889905	2889945	DEL	40	0.00902256
chr1	2896797	2896832	DEL	35	0.00676692
chr1	2896984	2897054	DEL	70	0.00977444
chr1	2899690	2899724	DEL	34	0.00075188
chr1	2902528	2902528	INS	85	0.0172932
chr1	2902861	2902917	DEL	56	0.0075188
chr1	2905552	2905588	DEL	36	0.00075188
chr1	2907889	2907889	INS	31	0.00526316
chr1	2921270	2921338	DEL	68	0.0428571
chr1	2921417	2921417	INS	85	0.0195489
chr1	2921572	2921572	INS	122	0.0195489
chr1	2921636	2921676	DEL	40	0.00075188
chr1	2921681	2921681	INS	87	0.0195489
chr1	2921881	2921881	INS	40	0.0661654
chr1	2921887	2921925	DEL	38	0.0112782
chr1	2926791	2926791	INS	35	0.00977444
chr1	2938504	2938504	INS	28	0.00300752
chr1	2944710	2944776	DEL	66	0.00977444
chr1	2945033	2945065	DEL	32	0.00526316
chr1	2947440	2947485	DEL	45	0.018797
chr1	2949628	2949872	DEL	244	0.630827
chr1	2949682	2949827	DEL	145	0.630827
chr1	2949687	2949687	INS	43	0.00150376
chr1	2949829	2949829	INS	48	0.00150376
chr1	2949964	2949964	INS	46	0.00150376
chr1	2960009	2960128	DEL	119	0.638346
chr1	2960125	2960125	INS	59	0.0210526
chr1	2965081	2965081	INS	78	0.0142857
chr1	2974644	2974708	DEL	64	0.611278
chr1	2974696	2974696	INS	267	0.0037594
chr1	2974696	2974696	INS	44	0.0917293
chr1	2976592	2976592	INS	206	0.184211
chr1	2976765	2976765	INS	84	0.00300752
chr1	2976779	2977042	DEL	263	0.396241
chr1	2976841	2976841	INS	499	0.00075188
chr1	2976855	2976855	INS	144	0.00300752
chr1	2976903	2977326	DEL	423	0.0879699
chr1	2976985	2977181	DEL	196	0.0300752
chr1	2977072	2977072	INS	213	0.00300752
chr1	2977079	2977285	DEL	206	0.0037594
chr1	2977335	2977413	DEL	78	0.0180451
chr1	2977463	2977463	INS	68	0.0105263
chr1	2977518	2977518	INS	139	0.00300752
chr1	2980995	2980995	INS	75	0.00075188
chr1	2994973	2995287	DEL	314	0.179699
chr1	2997726	2997726	INS	523	0.00300752
chr1	2997743	2997743	INS	220	0.00300752
chr1	3002044	3002122	DEL	78	0.0210526
chr1	3002468	3002803	DEL	335	0.145865
chr1	3016399	3016500	DEL	101	0.00225564
chr1	3016428	3016428	INS	93	0.0150376
chr1	3016573	3016573	INS	846	0.87218
chr1	3016685	3016685	INS	37	0.00075188
chr1	3016688	3016688	INS	332	0.87218
chr1	3016688	3016688	INS	580	0.87218
chr1	3026040	3026040	INS	415	0.958647
chr1	3026185	3026185	INS	63	0.00902256
chr1	3029241	3029304	DEL	63	0.00451128
chr1	3037786	3037786	INS	71	0.231579
chr1	3042654	3042654	INS	38	0.210526
chr1	3087231	3087262	DEL	31	0.00451128
chr1	3104583	3104583	INS	82	0.109023
chr1	3105928	3105958	DEL	30	0.112782
chr1	3110413	3110491	DEL	78	0.115789
chr1	3111468	3111468	INS	39	0.971429
chr1	3120037	3120037	INS	47	0.0293233
chr1	3128657	3128700	DEL	43	0.00075188
chr1	3129310	3129341	DEL	31	0.0879699
chr1	3146435	3146859	DEL	424	0.0150376
chr1	3146918	3147040	DEL	122	0.0165414
chr1	3150874	3150874	INS	243	0.00075188
chr1	3162854	3162854	INS	1216	0.00676692
chr1	3162861	3162861	INS	537	0.0383459
chr1	3162880	3162880	INS	40	0.024812
chr1	3162889	3163250	DUP	361	0.0112782
chr1	3162910	3162910	INS	255	0.0142857
chr1	3163058	3163058	INS	82	0.0142857
chr1	3163065	3163159	DEL	94	0.00150376
chr1	3163250	3163250	INS	84	0.0142857
chr1	3163253	3163253	INS	201	0.0142857
chr1	3165373	3165657	DEL	284	0.0165414
chr1	3165406	3165406	INS	1055	0.00225564
chr1	3165438	3165556	DEL	118	0.203008
chr1	3165526	3165595	DEL	69	0.0293233
chr1	3165602	3165602	INS	264	0.00150376
chr1	3165634	3165724	DEL	90	0.00075188
chr1	3165652	3165915	DEL	263	0.142105
chr1	3165731	3165899	DEL	168	0.142105
chr1	3165738	3165785	DEL	47	0.0691729
chr1	3165760	3165760	INS	47	0.00150376
chr1	3165898	3165947	DEL	49	0.00075188
chr1	3167630	3167630	INS	118	0.00451128
chr1	3167742	3167742	INS	398	0.00150376
chr1	3167763	3167763	INS	177	0.00451128
chr1	3167863	3167919	DEL	56	0.0368421
chr1	3167983	3167983	INS	58	0.0406015
chr1	3168179	3168179	INS	172	0.00451128
chr1	3168206	3168206	INS	56	0.0406015
chr1	3168259	3168259	INS	174	0.00451128
chr1	3176154	3176154	INS	239	0.854887
chr1	3176287	3176483	DEL	196	0.00902256
chr1	3180723	3180723	INS	34	0.00225564
chr1	3181025	3181025	INS	78	0.0270677
chr1	3181089	3181089	INS	366	0.00075188
chr1	3181251	3181251	INS	883	0.00902256
chr1	3181282	3181282	INS	446	0.00075188
chr1	3181289	3181289	INS	81	0.0345865
chr1	3181304	3181304	INS	36	0.0270677
chr1	3181335	3181335	INS	101	0.00150376
chr1	3181413	3181413	INS	634	0.00075188
chr1	3181530	3181530	INS	33	0.0270677
chr1	3181660	3181660	INS	51	0.0270677
chr1	3181692	3181692	INS	835	0.00902256
chr1	3181847	3181847	INS	584	0.00075188
chr1	3181912	3181912	INS	37	0.0270677
chr1	3194659	3194720	DEL	61	0.0120301
chr1	3212591	3212591	INS	453	0.136842
chr1	3212591	3212591	INS	175	0.136842
chr1	3212644	3212644	INS	104	0.0947368
chr1	3212661	3212695	DEL	34	0.00451128
chr1	3215371	3215371	INS	306	0.00225564
chr1	3215418	3215418	INS	123	0.160902
chr1	3231393	3231393	INS	43	0.157895
chr1	3240040	3240073	DEL	33	0.0406015
chr1	3255873	3255873	INS	32	0.33609
chr1	3260744	3260744	INS	855	0.978947
chr1	3269699	3269699	INS	72	0.103008
chr1	3269792	3269792	INS	41	0.118045
chr1	3270705	3270705	INS	28	0.118045
chr1	3276692	3276692	INS	27	0.0323308
chr1	3286839	3286839	INS	38	0.0203008
chr1	3286981	3286981	INS	41	0.0203008
chr1	3287242	3287334	DEL	92	0.00300752
chr1	3287247	3287247	INS	40	0.0203008
chr1	3287269	3287269	INS	492	0.00075188
chr1	3287272	3287272	INS	138	0.0037594
chr1	3287394	3287441	DEL	47	0.0443609
chr1	3287479	3287479	INS	166	0.0037594
chr1	3287506	3287844	DEL	338	0.00075188
chr1	3287507	3287650	DEL	143	0.429323
chr1	3287580	3287628	DEL	48	0.018797
chr1	3287620	3287620	INS	43	0.0203008
chr1	3287754	3287754	INS	139	0.0037594
chr1	3297971	3297971	INS	41	0.00827068
chr1	3299295	3299717	DEL	422	0.062406
chr1	3299301	3299423	DEL	122	0.44812
chr1	3299492	3299613	DEL	121	0.0609023
chr1	3299534	3299595	DEL	61	0.147368
chr1	3299768	3300376	DEL	608	0.0714286
chr1	3299984	3300289	DEL	305	0.0714286
chr1	3300256	3300439	DEL	183	0.00225564
chr1	3300372	3300433	DEL	61	0.210526
chr1	3303808	3303980	DEL	172	0.0165414
chr1	3316689	3316689	INS	73	0.0413534
chr1	3326004	3326004	INS	30	0.00150376
chr1	3326033	3326093	DEL	60	0.366165
chr1	3345770	3345835	DEL	65	0.268421
chr1	3351526	3351526	INS	638	0.971429
chr1	3357570	3357570	INS	97	0.0037594
chr1	3361811	3361845	DEL	34	0.00902256
chr1	3379292	3379292	INS	180	0.00075188
chr1	3379449	3379449	INS	55	0.0037594
chr1	3379456	3379456	INS	225	0.00075188
chr1	3379649	3379649	INS	149	0.00075188
chr1	3379838	3379838	INS	50	0.00451128
chr1	3403039	3403039	INS	30	0.0120301
chr1	3403050	3403080	DEL	30	0.270677
chr1	3408665	3408665	INS	169	0.0172932
chr1	3422144	3422209	DEL	65	0.00451128
chr1	3428148	3428148	INS	144	0.0150376
chr1	3428209	3428255	DEL	46	0.0075188
chr1	3428266	3428266	INS	49	0.191729
chr1	3428303	3428303	INS	141	0.0150376
chr1	3433572	3433572	INS	39	0.0804511
chr1	3443279	3443315	DEL	36	0.857143
chr1	3450456	3450456	INS	175	0.00075188
chr1	3450456	3450456	INS	70	0.00075188
chr1	3450520	3450520	INS	123	0.00075188
chr1	3470864	3470916	DEL	52	0.0233083
chr1	3475027	3475027	INS	59	0.00676692
chr1	3475044	3475044	INS	181	0.00526316
chr1	3475102	3475102	INS	54	0.00676692
chr1	3475196	3475255	DEL	59	0.012782
chr1	3475310	3475310	INS	114	0.00676692
chr1	3475464	3475464	INS	111	0.00676692
chr1	3475562	3475562	INS	59	0.00676692
chr1	3475694	3475694	INS	61	0.00676692
chr1	3477305	3477305	INS	1371	0.626316
chr1	3477308	3477308	INS	2980	0.626316
chr1	3477309	3477309	INS	3622	0.626316
chr1	3477319	3477319	INS	548	0.0526316
chr1	3482490	3482490	INS	39	0.0105263
chr1	3483082	3483126	DEL	44	0.00300752
chr1	3485932	3485965	DEL	33	0.00676692
chr1	3487133	3487164	DEL	31	0.00150376
chr1	3493164	3493226	DEL	62	0.0954887
chr1	3493194	3493194	INS	84	0.00225564
chr1	3493381	3493381	INS	61	0.00225564
chr1	3502002	3502113	DUP	111	0.0669173
chr1	3502019	3502019	INS	916	0.17594
chr1	3502019	3502019	INS	494	0.0796992
chr1	3502030	3502030	INS	3123	0.17594
chr1	3502040	3502040	INS	5123	0.0233083
chr1	3502046	3502046	INS	1490	0.17594
chr1	3502046	3502046	INS	1593	0.17594
chr1	3510344	3510344	INS	74	0.0308271
chr1	3510559	3510559	INS	36	0.163158
chr1	3538746	3538746	INS	32	0.00075188
chr1	3544270	3544270	INS	142	0.00300752
chr1	3546619	3546664	DEL	45	0.00451128
chr1	3546885	3546956	DEL	71	0.0218045
chr1	3546932	3546932	INS	71	0.00150376
chr1	3568360	3568360	INS	31	0.0511278
chr1	3571721	3571777	DEL	56	0.0398496
chr1	3571812	3571812	INS	95	0.00075188
chr1	3571984	3572082	DEL	98	0.00150376
chr1	3578747	3578747	INS	91	0.0135338
chr1	3578813	3578813	INS	264	0.0037594
chr1	3578853	3578853	INS	91	0.0135338
chr1	3578874	3578874	INS	185	0.0037594
chr1	3583003	3583730	DUP	727	0.075188
chr1	3583261	3583261	INS	343	0.0353383
chr1	3583295	3583295	INS	132	0.0308271
chr1	3583302	3583407	DEL	105	0.0571429
chr1	3583330	3583330	INS	523	0.0353383
chr1	3583360	3583810	DUP	450	0.075188
chr1	3583376	3583376	INS	57	0.0345865
chr1	3583377	3583377	INS	1206	0.0172932
chr1	3583402	3583402	INS	805	0.0353383
chr1	3583528	3583563	DEL	35	0.0293233
chr1	3583547	3583547	INS	191	0.0308271
chr1	3583556	3583556	INS	424	0.0353383
chr1	3583636	3583636	INS	74	0.0345865
chr1	3583651	3583817	DEL	166	0.0330827
chr1	3583749	3583749	INS	331	0.0353383
chr1	3583756	3583833	DEL	77	0.0774436
chr1	3583857	3583857	INS	130	0.0308271
chr1	3583898	3583898	INS	200	0.0308271
chr1	3585037	3585255	DEL	218	0.0203008
chr1	3585546	3585594	DEL	48	0.0233083
chr1	3585954	3585984	DEL	30	0.0112782
chr1	3587859	3587859	INS	367	0.00075188
chr1	3587879	3587879	INS	150	0.00150376
chr1	3587893	3587893	INS	267	0.00150376
chr1	3587903	3587903	INS	56	0.00225564
chr1	3588069	3588486	DEL	417	0.00075188
chr1	3588212	3588212	INS	87	0.0902256
chr1	3588337	3588337	INS	49	0.00225564
chr1	3588465	3588465	INS	40	0.00225564
chr1	3590827	3590827	INS	315	0.0210526
chr1	3591632	3591763	DEL	131	0.0233083
chr1	3591801	3591866	DEL	65	0.866917
chr1	3596438	3596438	INS	68	0.0390977
chr1	3596486	3596486	INS	660	0.00225564
chr1	3596505	3596505	INS	263	0.00225564
chr1	3596511	3596554	DEL	43	0.00902256
chr1	3596599	3596599	INS	45	0.0390977
chr1	3596637	3596637	INS	130	0.00601504
chr1	3596645	3596688	DEL	43	0.00601504
chr1	3619601	3619632	DEL	31	0.466917
chr1	3640483	3640631	DEL	148	0.00451128
chr1	3640514	3640514	INS	37	0.00150376
chr1	3643677	3643825	DEL	148	0.0210526
chr1	3643797	3643797	INS	48	0.00300752
chr1	3643848	3644000	DEL	152	0.0578947
chr1	3643901	3644409	DEL	508	0.0255639
chr1	3643918	3643918	INS	45	0.00300752
chr1	3643978	3644179	DEL	201	0.0556391
chr1	3644035	3644186	DEL	151	0.0556391
chr1	3644065	3644422	DEL	357	0.0834586
chr1	3644066	3644066	INS	49	0.00300752
chr1	3644204	3644407	DEL	203	0.0834586
chr1	3644370	3644421	DEL	51	0.0556391
chr1	3645533	3645533	INS	78	0.00902256
chr1	3658816	3658851	DEL	35	0.384211
chr1	3658908	3658908	INS	109	0.00300752
chr1	3674991	3674991	INS	360	0.00075188
chr1	3674991	3674991	INS	168	0.00075188
chr1	3675034	3675249	DEL	215	0.439098
chr1	3675103	3675103	INS	134	0.00075188
chr1	3675259	3675259	INS	48	0.0142857
chr1	3675304	3675304	INS	213	0.00075188
chr1	3679678	3679718	DEL	40	0.00225564
chr1	3679834	3679866	DEL	32	0.00451128
chr1	3681855	3681928	DEL	73	0.198496
chr1	3693767	3693767	INS	2515	0.00526316
chr1	3693801	3693801	INS	35	0.0323308
chr1	3693804	3693804	INS	176	0.0233083
chr1	3693948	3693948	INS	104	0.0533835
chr1	3694030	3694030	INS	792	0.0210526
chr1	3694114	3694114	INS	1427	0.00526316
chr1	3694132	3694166	DEL	34	0.00902256
chr1	3694155	3694155	INS	67	0.143609
chr1	3694228	3694228	INS	197	0.0541353
chr1	3694236	3694236	INS	32	0.143609
chr1	3694402	3694402	INS	167	0.0541353
chr1	3694516	3694516	INS	434	0.0541353
chr1	3694552	3694552	INS	34	0.143609
chr1	3694556	3694556	INS	137	0.0541353
chr1	3694764	3694764	INS	142	0.0541353
chr1	3694834	3694834	INS	35	0.143609
chr1	3694859	3694859	INS	709	0.0210526
chr1	3694882	3694882	INS	276	0.0541353
chr1	3697147	3697183	DEL	36	0.177444
chr1	3706370	3706370	INS	176	0.00451128
chr1	3706381	3706381	INS	403	0.00977444
chr1	3706427	3706427	INS	87	0.00451128
chr1	3706513	3706513	INS	138	0.00451128
chr1	3722679	3722710	DEL	31	0.0315789
chr1	3732510	3732510	INS	62	0.0105263
chr1	3739348	3739348	INS	35	0.00601504
chr1	3739374	3739478	DEL	104	0.0203008
chr1	3739492	3739492	INS	35	0.00601504
chr1	3739778	3739778	INS	335	0.00075188
chr1	3795055	3795055	INS	30	0.00075188
chr1	3797711	3797711	INS	49	0.087218
chr1	3797729	3797729	INS	129	0.1
chr1	3799554	3799586	DEL	32	0.0135338
chr1	3800443	3800593	DEL	150	0.191729
chr1	3820496	3820496	INS	49	0.56015
chr1	3825022	3825085	DEL	63	0.0037594
chr1	3832422	3832422	INS	81	0.209774
chr1	3834288	3834339	DEL	51	0.414286
chr1	3844700	3844700	INS	32	0.0180451
chr1	3868624	3868624	INS	160	0.965414
chr1	3868665	3868665	INS	768	0.00601504
chr1	3868666	3868666	INS	260	0.965414
chr1	3874087	3874321	DEL	234	0.00300752
chr1	3874337	3874490	DEL	153	0.129323
chr1	3874464	3874622	DEL	158	0.00827068
chr1	3874669	3874748	DEL	79	0.00451128
chr1	3880892	3880929	DEL	37	0.00075188
chr1	3891925	3892152	DEL	227	0.0157895
chr1	3891930	3892021	DEL	91	0.00977444
chr1	3891942	3892354	DEL	412	0.0977444
chr1	3892126	3892538	DEL	412	0.125564
chr1	3892150	3892150	INS	39	0.00225564
chr1	3892154	3892378	DEL	224	0.0278195
chr1	3892267	3892358	DEL	91	0.126316
chr1	3892319	3892548	DEL	229	0.00150376
chr1	3892358	3892446	DEL	88	0.103008
chr1	3895541	3895584	DEL	43	0.131579
chr1	3900759	3916506	DUP	15747	0.00150376
chr1	3908461	3908492	DEL	31	0.0142857
chr1	3920275	3920275	INS	127	0.0157895
chr1	3920396	3920396	INS	163	0.0157895
chr1	3920557	3920557	INS	144	0.0157895
chr1	3927491	3927491	INS	31	0.00150376
chr1	3929499	3929499	INS	281	0.0157895
chr1	3946233	3946233	INS	30	0.00075188
chr1	3973538	3973538	INS	133	0.150376
chr1	3973652	3973652	INS	90	0.150376
chr1	3986095	3986125	DEL	30	0.406015
chr1	3992269	3992301	DEL	32	0.00526316
chr1	3999699	3999699	INS	168	0.118797
chr1	3999759	3999759	INS	1530	0.0203008
chr1	3999765	3999882	DEL	117	0.552632
chr1	3999787	3999787	INS	531	0.0075188
chr1	3999921	3999921	INS	59	0.0180451
chr1	4007170	4007217	DEL	47	0.00225564
chr1	4016929	4016929	INS	50	0.00075188
chr1	4016941	4016941	INS	266	0.0105263
chr1	4016941	4016941	INS	192	0.927068
chr1	4016970	4016970	INS	455	0.0105263
chr1	4017060	4017060	INS	39	0.00075188
chr1	4043887	4043887	INS	31	0.012782
chr1	4064927	4065334	DEL	407	0.0180451
chr1	4064994	4065049	DEL	55	0.0496241
chr1	4065139	4065462	DEL	323	0.0037594
chr1	4065168	4065311	DEL	143	0.00075188
chr1	4065282	4065481	DEL	199	0.0037594
chr1	4065498	4065606	DEL	108	0.0315789
chr1	4065630	4065738	DEL	108	0.00300752
chr1	4065757	4065917	DEL	160	0.0037594
chr1	4065812	4066366	DEL	554	0.00827068
chr1	4065986	4066368	DEL	382	0.00827068
chr1	4077291	4077291	INS	187	0.0285714
chr1	4077293	4077698	DEL	405	0.00526316
chr1	4077305	4077305	INS	395	0.00150376
chr1	4077306	4077476	DEL	170	0.00225564
chr1	4077402	4077402	INS	58	0.0285714
chr1	4077407	4077407	INS	1504	0.00150376
chr1	4077472	4077472	INS	175	0.0172932
chr1	4077567	4077740	DEL	173	0.00150376
chr1	4077595	4077650	DEL	55	0.0225564
chr1	4077629	4077629	INS	56	0.308271
chr1	4077671	4077671	INS	444	0.0172932
chr1	4077776	4077948	DEL	172	0.00451128
chr1	4077822	4077822	INS	216	0.00225564
chr1	4077869	4077869	INS	184	0.00225564
chr1	4077915	4077915	INS	58	0.00225564
chr1	4077972	4077972	INS	274	0.0172932
chr1	4078021	4078098	DEL	77	0.0421053
chr1	4078034	4078034	INS	513	0.0172932
chr1	4078063	4078063	INS	38	0.308271
chr1	4078088	4078088	INS	156	0.00225564
chr1	4078096	4078096	INS	277	0.0172932
chr1	4078245	4078245	INS	114	0.00225564
chr1	4078373	4078373	INS	307	0.0172932
chr1	4078439	4078494	DEL	55	0.0075188
chr1	4078457	4078457	INS	56	0.00225564
chr1	4078474	4078474	INS	115	0.00225564
chr1	4078485	4078485	INS	523	0.0172932
chr1	4078498	4078498	INS	1654	0.00225564
chr1	4095087	4095401	DEL	314	0.286466
chr1	4100001	4100001	INS	114	0.00075188
chr1	4100112	4100112	INS	150	0.120301
chr1	4100234	4100234	INS	218	0.120301
chr1	4127041	4127096	DEL	55	0.00075188
chr1	4129846	4129906	DEL	60	0.0511278
chr1	4136525	4136525	INS	309	0.0210526
chr1	4136552	4136552	INS	46	0.00225564
chr1	4136720	4136720	INS	344	0.0210526
chr1	4136745	4136745	INS	42	0.0233083
chr1	4136777	4136777	INS	179	0.0210526
chr1	4144359	4144923	DUP	564	0.00150376
chr1	4144467	4144467	INS	122	0.221805
chr1	4144596	4144648	DEL	52	0.0293233
chr1	4144621	4144621	INS	77	0.221805
chr1	4144630	4144630	INS	1515	0.760902
chr1	4144630	4144630	INS	1015	0.760902
chr1	4144653	4144653	INS	394	0.00451128
chr1	4150047	4150047	INS	50	0.0037594
chr1	4162722	4162722	INS	297	0.992481
chr1	4178272	4178303	DEL	31	0.196992
chr1	4202972	4203011	DEL	39	0.00075188
chr1	4211139	4211421	DEL	282	0.0218045
chr1	4220839	4221215	DEL	376	0.00075188
chr1	4224547	4225884	DEL	1337	0.00075188
chr1	4228400	4228400	INS	321	0.110526
chr1	4266188	4266219	DEL	31	0.00075188
chr1	4274168	4274204	DEL	36	0.332331
chr1	4296102	4296137	DEL	35	0.0203008
chr1	4302981	4302981	INS	40	0.342857
chr1	4303256	4303287	DEL	31	0.390226
chr1	4318396	4318437	DEL	41	0.321053
chr1	4327176	4327176	INS	34	0.0796992
chr1	4327238	4327238	INS	40	0.0796992
chr1	4331794	4331794	INS	40	0.00601504
chr1	4331837	4331837	INS	268	0.0135338
chr1	4331926	4331926	INS	135	0.00676692
chr1	4332085	4332085	INS	68	0.012782
chr1	4332093	4332093	INS	172	0.00150376
chr1	4332403	4332403	INS	108	0.0165414
chr1	4332432	4332489	DEL	57	0.0225564
chr1	4332497	4332497	INS	1268	0.0150376
chr1	4332600	4332773	DEL	173	0.00902256
chr1	4332777	4332777	INS	80	0.00451128
chr1	4332998	4332998	INS	83	0.00451128
chr1	4333074	4333074	INS	538	0.0150376
chr1	4333094	4333094	INS	115	0.0165414
chr1	4333173	4333207	DEL	34	0.00075188
chr1	4333331	4333331	INS	115	0.0165414
chr1	4333578	4333578	INS	1876	0.102256
chr1	4336503	4336503	INS	617	0.00075188
chr1	4336617	4336617	INS	88	0.00075188
chr1	4343548	4343626	DEL	78	0.206767
chr1	4352738	4352798	DEL	60	0.00075188
chr1	4375992	4376286	DEL	294	0.00676692
chr1	4381421	4381471	DEL	50	0.0428571
chr1	4398516	4398552	DEL	36	0.00451128
chr1	4412787	4412821	DEL	34	0.00075188
chr1	4413895	4413895	INS	30	0.0503759
chr1	4420298	4420356	DEL	58	0.828571
chr1	4428063	4428163	DEL	100	0.0518797
chr1	4444423	4444469	DEL	46	0.00075188
chr1	4471984	4471984	INS	334	0.00225564
chr1	4508575	4508608	DEL	33	0.0842105
chr1	4508885	4508885	INS	37	0.329323
chr1	4520725	4520725	INS	48	0.364662
chr1	4520816	4520961	DEL	145	0.117293
chr1	4522913	4522943	DEL	30	0.180451
chr1	4531706	4531751	DEL	45	0.00225564
chr1	4538250	4538287	DEL	37	0.00075188
chr1	4539845	4539845	INS	30	0.374436
chr1	4543683	4543683	INS	146	0.834586
chr1	4560222	4560252	DEL	30	0.00075188
chr1	4583044	4583044	INS	34	0.00300752
chr1	4583850	4583883	DEL	33	0.0120301
chr1	4583873	4583873	INS	40	0.00300752
chr1	4600171	4600171	INS	35	0.293233
chr1	4616437	4616582	DEL	145	0.0669173
chr1	4616483	4616483	INS	39	0.0827068
chr1	4632576	4632649	DEL	73	0.0165414
chr1	4632605	4632605	INS	148	0.00075188
chr1	4632631	4632631	INS	40	0.0225564
chr1	4632702	4632736	DEL	34	0.0263158
chr1	4632737	4632737	INS	74	0.152632
chr1	4632742	4633005	DEL	263	0.166165
chr1	4632856	4633147	DEL	291	0.166165
chr1	4632899	4633024	DEL	125	0.018797
chr1	4632932	4632932	INS	45	0.0225564
chr1	4632960	4632992	DEL	32	0.0353383
chr1	4632984	4632984	INS	323	0.00075188
chr1	4633013	4633013	INS	169	0.00075188
chr1	4633118	4633118	INS	62	0.0225564
chr1	4633231	4633231	INS	34	0.0225564
chr1	4633344	4633400	DEL	56	0.243609
chr1	4633364	4633364	INS	46	0.0225564
chr1	4636368	4636368	INS	29	0.0195489
chr1	4639232	4639262	DEL	30	0.0150376
chr1	4649304	4649345	DEL	41	0.54812
chr1	4649563	4649563	INS	137	0.0135338
chr1	4649593	4649639	DEL	46	0.673684
chr1	4649666	4649666	INS	139	0.0135338
chr1	4666173	4666222	DEL	49	0.00075188
chr1	4666216	4666216	INS	53	0.00225564
chr1	4666525	4666556	DEL	31	0.470677
chr1	4666709	4666709	INS	62	0.00225564
chr1	4682683	4682683	INS	87	0.0172932
chr1	4705395	4705426	DEL	31	0.0285714
chr1	4724671	4724703	DEL	32	0.062406
chr1	4726140	4726140	INS	36	0.0616541
chr1	4729587	4729587	INS	34	0.458647
chr1	4740371	4740371	INS	167	0.996992
chr1	4778587	4778587	INS	41	0.00075188
chr1	4778614	4778644	DEL	30	0.00451128
chr1	4811226	4811256	DEL	30	0.0398496
chr1	4822291	4822977	DEL	686	0.0112782
chr1	4835032	4835032	INS	36	0.358647
chr1	4885567	4885567	INS	38	0.0578947
chr1	4888322	4888322	INS	33	0.00300752
chr1	4939192	4939552	DUP	360	0.00676692
chr1	4939371	4939745	DUP	374	0.00150376
chr1	4939478	4939478	INS	1855	0.963158
chr1	4939500	4939543	DEL	43	0.0834586
chr1	4939559	4939559	INS	78	0.00300752
chr1	4943723	4943758	DEL	35	0.0135338
chr1	4969197	4969197	INS	34	0.182707
chr1	5075709	5075709	INS	48	0.865414
chr1	5081000	5081000	INS	30	0.00225564
chr1	5083072	5083148	DEL	76	0.00451128
chr1	5104125	5104125	INS	30	0.00075188
chr1	5112402	5113471	DEL	1069	0.00225564
chr1	5112461	5112461	INS	83	0.0315789
chr1	5112465	5112465	INS	491	0.985714
chr1	5160275	5160275	INS	628	0.00075188
chr1	5160287	5160287	INS	64	0.0203008
chr1	5175519	5175553	DEL	34	0.00075188
chr1	5199086	5199131	DEL	45	0.242857
chr1	5214527	5214527	INS	35	0.0639098
chr1	5214674	5214674	INS	29	0.0639098
chr1	5225282	5225282	INS	33	0.196992
chr1	5246239	5246239	INS	30	0.00451128
chr1	5246617	5246617	INS	66	0.062406
chr1	5246622	5246692	DEL	70	0.440602
chr1	5276675	5276716	DEL	41	0.00225564
chr1	5290833	5290879	DEL	46	0.0932331
chr1	5290855	5291221	DEL	366	0.0263158
chr1	5304000	5304102	DEL	102	0.423308
chr1	5332803	5332803	INS	30	0.00075188
chr1	5333195	5333227	DEL	32	0.00225564
chr1	5334118	5334118	INS	58	0.0293233
chr1	5334231	5334231	INS	201	0.0879699
chr1	5334263	5334263	INS	32	0.0541353
chr1	5334339	5334339	INS	207	0.0879699
chr1	5334396	5334396	INS	88	0.0293233
chr1	5334508	5334593	DEL	85	0.00225564
chr1	5334525	5334525	INS	59	0.0293233
chr1	5334527	5334527	INS	159	0.0293233
chr1	5334548	5334548	INS	89	0.0293233
chr1	5334691	5334691	INS	185	0.0879699
chr1	5348905	5348905	INS	84	0.00075188
chr1	5386937	5386937	INS	3287	0.886466
chr1	5387171	5387171	INS	5216	0.886466
chr1	5387305	5387337	DEL	32	0.00526316
chr1	5387325	5387325	INS	224	0.0142857
chr1	5404567	5404600	DEL	33	0.0601504
chr1	5404930	5404930	INS	59	0.281203
chr1	5404941	5405001	DEL	60	0.0142857
chr1	5414190	5414228	DEL	38	0.515038
chr1	5414229	5414229	INS	36	0.0330827
chr1	5430476	5430476	INS	36	0.199248
chr1	5474559	5474625	DEL	66	0.00451128
chr1	5499431	5499431	INS	32	0.00300752
chr1	5500771	5500801	DEL	30	0.00601504
chr1	5523588	5523588	INS	29	0.00601504
chr1	5584075	5584108	DEL	33	0.0278195
chr1	5593290	5593290	INS	63	0.455639
chr1	5596457	5596487	DEL	30	0.00075188
chr1	5604450	5604450	INS	48	0.0593985
chr1	5609345	5609379	DEL	34	0.00075188
chr1	5618522	5618576	DEL	54	0.00075188
chr1	5633776	5633776	INS	96	0.0142857
chr1	5633852	5633945	DEL	93	0.00150376
chr1	5633905	5633905	INS	91	0.0142857
chr1	5639379	5639413	DEL	34	0.0180451
chr1	5653002	5653002	INS	36	0.00075188
chr1	5655874	5655910	DEL	36	0.31203
chr1	5656068	5656115	DEL	47	0.00300752
chr1	5667676	5667871	DEL	195	0.0150376
chr1	5667705	5667705	INS	227	0.00676692
chr1	5668172	5668172	INS	99	0.24812
chr1	5674345	5674345	INS	31	0.0037594
chr1	5688400	5688431	DEL	31	0.00075188
chr1	5701780	5701780	INS	46	0.0105263
chr1	5701873	5701873	INS	32	0.0105263
chr1	5713525	5713525	INS	198	0.310526
chr1	5713525	5713525	INS	125	0.0383459
chr1	5713577	5713577	INS	303	0.310526
chr1	5722408	5722438	DEL	30	0.00526316
chr1	5722416	5722416	INS	34	0.0548872
chr1	5733530	5733530	INS	27	0.0037594
chr1	5736369	5736413	DEL	44	0.429323
chr1	5744133	5744232	DEL	99	0.976692
chr1	5747531	5747916	DEL	385	0.00075188
chr1	5747614	5747614	INS	34	0.0142857
chr1	5757944	5757944	INS	32	0.00075188
chr1	5777158	5777191	DEL	33	0.0285714
chr1	5802856	5802856	INS	444	0.998496
chr1	5811402	5811402	INS	35	0.235338
chr1	5816839	5816839	INS	274	0.385714
chr1	5816896	5816944	DEL	48	0.00451128
chr1	5816957	5816957	INS	48	0.00300752
chr1	5817129	5817173	DEL	44	0.012782
chr1	5817138	5817138	INS	152	0.0150376
chr1	5817273	5817273	INS	690	0.018797
chr1	5817273	5817273	INS	311	0.385714
chr1	5817275	5817275	INS	73	0.00300752
chr1	5821424	5821424	INS	45	0.190977
chr1	5829846	5829846	INS	349	0.97594
chr1	5832282	5832282	INS	749	0.907519
chr1	5832289	5832289	INS	77	0.00676692
chr1	5832294	5832294	INS	443	0.00075188
chr1	5832304	5832304	INS	1182	0.907519
chr1	5868714	5868744	DEL	30	0.0105263
chr1	5874230	5874230	INS	281	0.208271
chr1	5882323	5882354	DEL	31	0.00526316
chr1	5922749	5922749	INS	33	0.00075188
chr1	5949345	5949345	INS	34	0.0413534
chr1	5957489	5957489	INS	52	0.00075188
chr1	5957573	5957678	DEL	105	0.0037594
chr1	5958858	5958858	INS	30	0.00601504
chr1	5964943	5964943	INS	31	0.120301
chr1	5971740	5971845	DEL	105	0.00150376
chr1	5977905	5977905	INS	1354	0.545865
chr1	5977906	5977906	INS	785	0.545865
chr1	5988807	5988807	INS	49	0.00150376
chr1	6001312	6001352	DEL	40	0.00075188
chr1	6004949	6004949	INS	485	0.00300752
chr1	6004956	6004956	INS	2094	0.00225564
chr1	6004962	6004962	INS	37	0.0413534
chr1	6004964	6005081	DEL	117	0.105263
chr1	6005005	6005005	INS	196	0.00902256
chr1	6005050	6005166	DEL	116	0.163158
chr1	6005085	6005329	DEL	244	0.0037594
chr1	6005112	6005112	INS	34	0.0165414
chr1	6005216	6005216	INS	159	0.00601504
chr1	6005238	6005435	DEL	197	0.215038
chr1	6005242	6005320	DEL	78	0.0255639
chr1	6005265	6005265	INS	72	0.00827068
chr1	6005319	6005440	DEL	121	0.0796992
chr1	6005399	6005399	INS	734	0.00300752
chr1	6005407	6005407	INS	229	0.00601504
chr1	6005422	6005422	INS	356	0.00827068
chr1	6005436	6005436	INS	38	0.00977444
chr1	6005489	6006313	INV	824	0.00300752
chr1	6005916	6005916	INS	678	0.00827068
chr1	6005923	6005923	INS	200	0.0037594
chr1	6005942	6006518	DEL	576	0.154887
chr1	6005952	6006028	DEL	76	0.0706767
chr1	6006015	6006015	INS	1060	0.00300752
chr1	6006021	6006403	DEL	382	0.154887
chr1	6006022	6006022	INS	56	0.0157895
chr1	6006049	6006049	INS	154	0.0037594
chr1	6006105	6006105	INS	353	0.0037594
chr1	6006176	6006254	DEL	78	0.0203008
chr1	6006226	6006600	DEL	374	0.154887
chr1	6006270	6006306	DEL	36	0.0270677
chr1	6006295	6006556	DEL	261	0.11203
[truncated: 363,919+ more rows]

## Sheet: Sheet1
Supplemental Table 4	UDN LR-GS SV Allele Frequency Table
Column Name	Description
chrom	chromosome of SV
start	Start of SV
end	End of SV
type	SV type
length	SV length
AF	Allele frequency based on LR-GS
