# Supplementary material for: Integration of transcriptomics and long-read genomics prioritizes structural variants in rare disease
Source: HighWire-hosted journal article supplement (doi:10.1101/gr.279323.124), 2025-03-20
Supplement: Supplemental_Table_S6.xlsx [file Supplemental_Table_S6.xlsx]

## Sheet: Watershed-SV
Alias	Clinical Diagnosis	Sex	Site of biopsy	Previous NGS testing	Status of genetic diagnosis before RNA-seq	Status of genetic diagnosis after RNA-seq splicing screening	2023 Outlier calls	SV candidate description	Watershed-SV posterior	WGS-only posterior
N10	Limb-girdle muscular dystrophy	F	Deltoid	Gene panel, WES, WGS	No strong candidates	NA	PIP5K1C underexpression	PIP5K1C, 3' exon deletion, heterozygous	0.99	0.78
N18	Congenital myopathy	F	Deltoid/Quadriceps	WES, WGS	No strong candidates	NA	KCND2 overexpression	KCND2, upstream noncoding deletion, heterozygous	0.52	0.05
N26	Nemaline myopathy	M	Deltoid/Quadriceps	Gene panel, WES, WGS	No strong candidates	NA	NARS2 underexpression	NARS2, whole gene deletion, heterozygous	0.97	0.39
X1	muscle weakness, slowly progressive, with bilateral elbow contractures and high CK	N/A	Muscle, unknown	WGS	No strong candidates	NA	SNRPN underexpression	SNRPN, whole gene inversion, heterozyous	0.94	0.11
C3	Duchenne muscular dystrophy	M	Muscle, unknown	WES	Strong candidate gene	MLPA, targeted sequencing of DMD, performed prior to WES	DMD underexpression	DMD, single exon deletion, homozygous	0.99	0.93
C4	Duchenne muscular dystrophy	M	Muscle, unknown	WES	Strong candidate gene	MLPA, targeted sequencing of DMD, performed prior to WES	DMD underexpression	DMD, 5' exons inversion, heterozygous	0.99	0.98

## Sheet: Aliases
Candidate extended splice site	E1
Strong candidate gene	C1
Previously diagnosed	D1
No strong candidates from previous sequencing	A1
No diagnosis after Cummings et al. 2017	N1
additional undiagnosed individual from CMG	X1

## Sheet: README
Supplemental Table 6	CMG Muscular Disorder Patients Metadata
Column Name	Description
Alias	DE-identified Patient ID
Clinical Diagnosis	Diagnosis from clinicians
Sex	biological sex
Site of biopsy	where the RNA-seq tissue is extracted
Previous NGS testing	Types of NGS testing prior to Cummings et al. 2017
Status of genetic diagnosis before RNA-seq	whether there's diagnosis before RNA-seq
Status of genetic diagnosis after RNA-seq splicing screening	whether there's diagnosis after RNA-seq splicing analysis
2023 Outlier calls	new outlier calls performed in this paper
SV candidate description	Gene name, SV type, and where the SV is by major annotation categories
Watershed-SV posterior	Watershed-SV posterior probability
WGS-only posterior	WGS-only posterior probability
